# Supplementary material
Source: PubMed Central journal article supplement (PMC5674796)
Supplement: NIHMS915640-supplement-Supporting_Information.pdf [file NIHMS915640-supplement-Supporting_Information.pdf]

## Table of Contents

|                                                                                                         |     |
|---------------------------------------------------------------------------------------------------------|-----|
| Materials and Methods                                                                                   | S1  |
| Representative Procedures for the Synthesis of Electrophiles                                            | S3  |
| Spectroscopic Data for the Synthesis of Electrophiles                                                   | S4  |
| General Procedure for Optimization of the Ir-Catalyzed Allylic Alkylation                               | S7  |
| General Procedure for the Enantioenriched Carboxylic Acid Synthesis                                     | S8  |
| Spectroscopic Data for the Enantioenriched Carboxylic Acids                                             | S9  |
| Determination of Enantiomeric Excess                                                                    | S15 |
| Experimental Procedures and Spectroscopic Data for the One-Pot Syntheses of Carboxylic Acid Derivatives | S17 |
| Experimental Procedures and Spectroscopic Data for the Product Transformations                          | S20 |
| Crystal Structure Data for Carboxylic Acid <b>7h</b>                                                    | S22 |
| References                                                                                              | S27 |
| <sup>1</sup> H NMR, <sup>13</sup> C NMR, and IR Spectra                                                 | S29 |

## Materials and Methods

Unless otherwise stated, reactions were performed in flame-dried glassware under an argon or nitrogen atmosphere using dry, deoxygenated solvents. Solvents were dried by passage through an activated alumina column under argon. Commercially obtained reagents were used as received. Chemicals were purchased from Sigma Aldrich/Strem/Alfa Aesar/Oakwood Chemicals and used as received. Reaction temperatures were controlled by an IKAmag temperature modulator. Glove box manipulations were performed under a nitrogen atmosphere. Thin-layer chromatography (TLC) and preparatory TLC was

performed using E. Merck silica gel 60 F254 precoated plates (0.25 mm) and visualized by UV fluorescence quenching, KMnO<sub>4</sub>, or *p*-anisaldehyde staining. SiliaFlash P60 Academic Silica gel (particle size 0.040–0.063 mm) was used for flash chromatography. Analytical chiral HPLC was performed with an Agilent 1100 Series HPLC utilizing a Chiralpak IC column (4.6 mm x 25 cm) or a Chiralpak AD-H column (4.6 mm x 25 cm), both obtained from Daicel Chemical Industries, Ltd. with visualization at 210 nm. Analytical SFC was performed with a Mettler SFC supercritical CO<sub>2</sub> analytical chromatography system utilizing a Chiralpak AD-H column (4.6 mm x 25 cm) obtained from Daicel Chemical Industries, Ltd. with visualization at 210 nm. Preparatory HPLC was performed with an Agilent 1200 Series HPLC equipped with a Viridis SFC 2-Ethylpyridine 5 μm column (4.6 x 250 mm). <sup>1</sup>H NMR spectra were recorded on a Bruker Avance HD 400 MHz spectrometer and are reported relative to residual CHCl<sub>3</sub> (δ 7.26 ppm). <sup>13</sup>C NMR spectra were recorded on a Bruker Avance HD 400 MHz spectrometer and are reported relative to residual CDCl<sub>3</sub> (δ 77.16 ppm). Data for <sup>1</sup>H NMR are reported as follows: s = singlet, d = doublet, t = triplet, q = quartet, p = pentet, sept = septuplet, m = multiplet, br s = broad singlet. Data for <sup>13</sup>C NMR are reported in terms of chemical shifts (δ ppm). Some reported spectra include minor solvent impurities of benzene (δ 7.36 ppm), water (δ 1.56 ppm), ethyl acetate (δ 4.12, 2.05, 1.26 ppm), methylene chloride (δ 5.30 ppm), grease (δ 1.26, 0.86 ppm), and/or silicon grease (δ 0.07 ppm), which do not impact product assignments. IR spectra were obtained using a Perkin Elmer Paragon 1000 spectrometer using thin films deposited on NaCl plates and reported in frequency of absorption (cm<sup>-1</sup>). High resolution mass spectra (HRMS) were obtained from the Caltech Mass Spectral Facility using a JEOL JMS-600H High Resolution Mass Spectrometer in fast atom bombardment (FAB+) or electron ionization (EI+) mode, or an Agilent 6200 Series TOF with an Agilent G1978A Multimode source in electrospray ionization (ESI+), atmospheric pressure chemical ionization (APCI+), or mixed ionization mode (MM: ESI-APCI+). Optical rotations were measured with a Jasco P-2000 polarimeter operating on the sodium D-line (589 nm), using a 100 mm pathlength cell and are reported as: [α]<sub>D</sub><sup>1</sup> (concentration in g/100 mL, solvent).

**List of Abbreviations:** ee – enantiomeric excess, HPLC – high-performance liquid chromatography, TLC – thin-layer chromatography, EtOAc – ethyl acetate, THF – tetrahydrofuran, MeOH – methanol, Et<sub>2</sub>O – diethyl ether, IPA – isopropanol, AcOH – acetic acid, DME – dimethoxyethane, TBD – 1,5,7-triazabicyclo[4.4.0]dec-5-ene, cod – *cis,cis*-1,5-cyclooctadiene, DIBAL – diisobutylaluminium hydride, dppp – 1,3-bis(diphenylphosphino)propane, MAC – masked acyl cyanide, CSA – camphorsulfonic acid

**Preparation of Known Compounds:** Previously reported methods were used to prepare ligands (*S,S*<sub>a</sub>)-L1<sup>1</sup> and (*S*<sub>a</sub>)-L3<sup>2</sup> as well as starting materials **1**<sup>3</sup>, **2**<sup>5</sup>, **5**<sup>4</sup>, **6a**<sup>5</sup>, **6b**<sup>6</sup>, **6d**<sup>6</sup>, **6e**<sup>6</sup>, **6j**<sup>6</sup>, **6l**<sup>6</sup>, **8a**<sup>6</sup>, **8d**<sup>6</sup>, and **8f**<sup>6</sup>.

**Representative Procedures for the Synthesis of Electrophiles****Representative Procedure #1: Oxidative Heck Reaction<sup>7</sup>**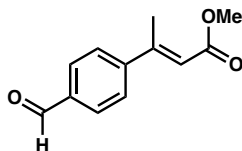

**Methyl (E)-3-(4-formylphenyl)but-2-enoate (SI-1).** To a solution of (4-formylphenyl)boronic acid (0.75 g, 5.0 mmol, 1 equiv), Pd(OAc)<sub>2</sub> (23 mg, 0.10 mmol, 0.02 equiv), dppp (62 mg, 0.15 mmol, 0.03 equiv) in acetone (8 mL) was added methyl crotonate (1.1 mL, 10.0 mmol, 2 equiv) followed by trifluoroacetic acid (0.12 mL, 1.5 mmol, 0.3 equiv). The resulting slurry was heated under reflux for 48 h, whereupon the reaction was cooled to ambient temperature and concentrated under reduced pressure. The crude product was purified by silica gel flash column chromatography (5% EtOAc/hexanes) to give carbonate **SI-1** as a colorless oil (0.17 g, 17% yield): <sup>1</sup>H NMR (400 MHz, CDCl<sub>3</sub>) δ 10.06 (s, 1H), 7.97 – 7.78 (m, 2H), 7.74 – 7.58 (m, 2H), 6.22 (q, *J* = 1.3 Hz, 1H), 3.80 (s, 3H), 2.62 (d, *J* = 1.4 Hz, 3H); <sup>13</sup>C NMR (101 MHz, CDCl<sub>3</sub>) δ 191.8, 167.0, 154.4, 148.2, 136.5, 130.1, 127.1, 119.0, 51.5, 18.1; IR (Neat Film, NaCl) 2950, 2839, 1704, 1631, 1605, 1434, 1349, 1273, 1214, 1171, 1036, 828 cm<sup>-1</sup>; HRMS (FAB+) *m/z* calc'd for C<sub>12</sub>H<sub>13</sub>O<sub>3</sub> [M+H]<sup>+</sup>: 205.0865, found 205.0860.

**Representative Procedure #2: Reduction & Acylation**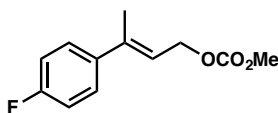

**(E)-3-(4-Fluorophenyl)but-2-en-1-yl methyl carbonate (6c).** To a solution of methyl (E)-3-(4-fluorophenyl)but-2-enoate<sup>8</sup> (0.30 g, 1.6 mmol, 1 equiv) in THF (3.1 mL) at -78 °C was added DIBAL (0.85 mL, 4.8 mmol, 3 equiv) dropwise. The resulting reaction mixture was stirred at -78 °C for 2.5 h, whereupon the reaction was quenched with a saturated aqueous Rochelle's salt solution (5 mL). The cooling bath was then removed and the reaction was stirred for 18 h at ambient temperature. The aqueous layer was extracted with CH<sub>2</sub>Cl<sub>2</sub> (3 x 20 mL) and the combined organic layers were washed with brine (20 mL), dried over Na<sub>2</sub>SO<sub>4</sub>, and concentrated under reduced pressure.

The crude material was then dissolved in CH<sub>2</sub>Cl<sub>2</sub> (6.4 mL) and cooled to 0 °C. Pyridine (1.1 mL, 13 mmol, 8.3 equiv) was added followed by methyl chloroformate (0.28 mL, 3.7 mmol, 2.3 equiv) dropwise. The resulting solution was allowed to warm to ambient temperature and stirred for 18 h. The reaction was quenched with the addition of 1 M HCl (5 mL) and the aqueous layer was extracted with CH<sub>2</sub>Cl<sub>2</sub> (3 x 20 mL). The combined organic layers were washed with brine (20 mL), dried over Na<sub>2</sub>SO<sub>4</sub>, and concentrated under reduced pressure. The crude product was purified by silica gel flash column chromatography (5% EtOAc/hexanes) to give carbonate **6c** as a colorless solid (0.14 g,

38% yield): <sup>1</sup>H NMR (400 MHz, CDCl<sub>3</sub>) δ 7.40 – 7.33 (m, 2H), 7.05 – 6.96 (m, 2H), 5.87 (tq, *J* = 7.0, 1.4 Hz, 1H), 4.84 (dd, *J* = 7.1, 0.8 Hz, 2H), 3.80 (s, 3H), 2.11 (dd, *J* = 1.4, 0.7 Hz, 3H); <sup>13</sup>C NMR (101 MHz, CDCl<sub>3</sub>) δ 163.7, 161.3, 156.0, 140.2, 138.6 (d, *J* = 3.3 Hz), 127.6 (d, *J* = 8.0 Hz), 120.7 (d, *J* = 1.3 Hz), 115.4, 115.1, 65.0, 55.0, 16.5; IR (Neat Film, NaCl) 2961, 1896, 1742, 1649, 1589, 1468, 1442, 1379, 1334, 1252, 1110, 994, 960, 945, 825, 794 cm<sup>-1</sup>; HRMS (FAB+) *m/z* calc'd for C<sub>12</sub>H<sub>13</sub>FO<sub>3</sub> [M]<sup>+</sup>: 224.0849, found 224.0850.

### Spectroscopic Data for the Synthesis of Electrophiles

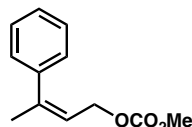

**(Z)-methyl (3-phenylbut-2-en-1-yl) carbonate (4).** Carbonate **4** was prepared from ethyl (*Z*)-3-phenylbut-2-enoate<sup>9</sup> according to Representative Procedure #2 and isolated by silica gel flash column chromatography (5% EtOAc/hexanes) as a colorless oil (0.18 g, 49% yield): <sup>1</sup>H NMR (400 MHz, CDCl<sub>3</sub>) δ 7.41 – 7.18 (m, 5H), 5.76 – 5.68 (m, 1H), 4.58 (dd, *J* = 7.2, 1.1 Hz, 2H), 3.79 (s, 3H), 2.13 (q, *J* = 1.2 Hz, 3H); <sup>13</sup>C NMR (101 MHz, CDCl<sub>3</sub>) δ 155.8, 143.8, 140.3, 128.4, 127.8, 127.6, 120.5, 65.8, 54.8, 25.6; IR (Neat Film, NaCl) 3023, 2956, 1748, 1494, 1441, 1382, 1350, 1263, 1024, 944, 792, 765, 702 cm<sup>-1</sup>; HRMS (FAB+) *m/z* calc'd for C<sub>12</sub>H<sub>15</sub>O<sub>3</sub> [M+H]<sup>+</sup>: 207.1021, found 207.1011.

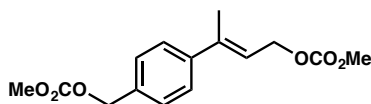

**(E)-3-(4-(((Methoxycarbonyl)oxy)methyl)phenyl)but-2-en-1-yl methyl carbonate (6f).** Carbonate **6f** was prepared from **SI-1** according to Representative Procedure #2 and isolated by silica gel flash column chromatography (5% EtOAc/hexanes) as a colorless solid (0.11 g, 46% yield): <sup>1</sup>H NMR (400 MHz, CDCl<sub>3</sub>) δ 7.44 – 7.31 (m, 4H), 5.98 – 5.88 (m, 1H), 5.15 (s, 2H), 4.85 (dd, *J* = 7.0, 0.9 Hz, 2H), 3.802 (s, 3H), 3.795 (s, 3H), 2.13 – 2.10 (m, 3H); <sup>13</sup>C NMR (101 MHz, CDCl<sub>3</sub>) δ 156.0, 155.9, 142.8, 140.6, 134.7, 128.5, 126.3, 121.2, 69.4, 65.0, 55.1, 55.0, 16.4; IR (Neat Film, NaCl) 2959, 1754, 1443, 1385, 1333, 1288, 958, 909, 794, 731 cm<sup>-1</sup>; HRMS (FAB+) *m/z* calc'd for C<sub>15</sub>H<sub>18</sub>O<sub>6</sub> [M]<sup>+</sup>: 294.1103, found 294.1098.

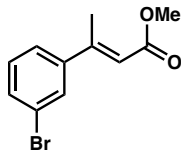

**Methyl (*E*)-3-(3-bromophenyl)but-2-enoate (SI-2).** Ester **SI-2** was prepared from (3-bromophenyl)boronic acid according to Representative Procedure #1 and isolated by silica gel flash column chromatography (3% EtOAc/hexanes) as a colorless oil (0.54 g, 42% yield): <sup>1</sup>H NMR (400 MHz, CDCl<sub>3</sub>) δ 7.65 – 7.59 (m, 1H), 7.51 (ddd, *J* = 7.9, 2.0, 1.0 Hz, 1H), 7.45 – 7.37 (m, 1H), 7.31 – 7.26 (m, 1H), 6.14 (q, *J* = 1.3 Hz, 1H), 3.78 (d, *J* = 1.2 Hz, 3H), 2.57 (d, *J* = 1.4 Hz, 3H); <sup>13</sup>C NMR (101 MHz, CDCl<sub>3</sub>) δ 167.1, 154.3, 144.4, 132.1, 130.2, 129.6, 125.1, 122.8, 117.9, 51.4, 18.1; IR (Neat Film, NaCl) 3062, 2948, 1719, 1631, 1558, 1435, 1346, 1274, 1191, 1168, 1037, 869, 785, 688 cm<sup>-1</sup>; HRMS (FAB+) *m/z* calc'd for C<sub>11</sub>H<sub>12</sub>O<sub>2</sub>Br [M+H]<sup>+</sup>: 255.0021, found 255.0020.

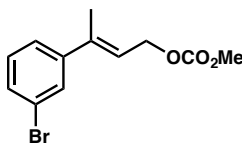

**(*E*)-3-(3-Bromophenyl)but-2-en-1-yl methyl carbonate (6g).** Carbonate **6g** was prepared from **SI-2** according to Representative Procedure #2 and isolated by silica gel flash column chromatography (5% EtOAc/hexanes) as a colorless oil (0.47 g, 78% yield): <sup>1</sup>H NMR (400 MHz, CDCl<sub>3</sub>) δ 7.54 (t, *J* = 1.8 Hz, 1H), 7.40 (ddd, *J* = 7.9, 1.9, 1.0 Hz, 1H), 7.32 (ddd, *J* = 7.8, 1.8, 1.0 Hz, 1H), 7.22 – 7.14 (m, 1H), 5.96 – 5.88 (m, 1H), 4.88 – 4.76 (m, 2H), 3.81 (s, 3H), 2.12 – 2.08 (m, 3H); <sup>13</sup>C NMR (101 MHz, CDCl<sub>3</sub>) δ 155.93, 144.65, 139.74, 130.68, 129.96, 129.18, 124.64, 122.65, 122.08, 64.84, 55.02, 16.38; IR (Neat Film, NaCl) 2955, 1748, 1590, 1558, 1442, 1376, 1332, 1263, 946, 789, 690 cm<sup>-1</sup>; HRMS (FAB+) *m/z* calc'd for C<sub>12</sub>H<sub>13</sub>O<sub>3</sub>Br [M]<sup>+</sup>: 284.0048, found 284.0073.

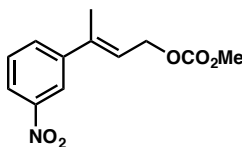

**(*E*)-Methyl (3-(3-nitrophenyl)but-2-en-1-yl) carbonate (6h).** Carbonate **6h** was prepared from methyl (*E*)-3-(3-nitrophenyl)but-2-enoate<sup>8</sup> according to Representative Procedure #2 and isolated by silica gel flash column chromatography (10% EtOAc/hexanes) as a colorless oil (0.47 g, 78% yield): <sup>1</sup>H NMR (400 MHz, CDCl<sub>3</sub>) δ 8.26 (t, *J* = 2.0 Hz, 1H), 8.14 (ddd, *J* = 8.2, 2.3, 1.0 Hz, 1H), 7.73 (ddd, *J* = 7.8, 1.8, 1.1 Hz, 1H), 7.51 (t, *J* = 8.0 Hz, 1H), 6.10 – 5.91 (m, 1H), 4.88 (dt, *J* = 6.9, 0.8 Hz, 2H), 3.82 (s, 3H), 2.18 (dd, *J* = 1.4, 0.7 Hz, 3H); <sup>13</sup>C NMR (101 MHz, CDCl<sub>3</sub>) δ 155.9, 148.5, 144.1, 138.7, 131.9, 129.4, 123.6, 122.5, 121.0, 64.7, 55.1, 16.4; IR (Neat Film, NaCl) 3108, 3026, 2969, 2868, 1750, 1530, 1443, 1384, 1353, 1279, 1096, 994, 949, 930, 876, 788, 736, 682 cm<sup>-1</sup>; HRMS (FAB+) *m/z* calc'd for C<sub>12</sub>H<sub>14</sub>O<sub>5</sub>N [M+H]<sup>+</sup>: 252.0872, found 252.0884.

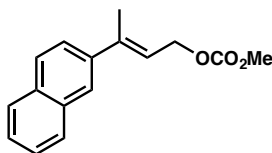

**(E)-methyl (3-(Naphthalen-2-yl)but-2-en-1-yl) carbonate (6i).** Carbonate **6i** was prepared from methyl (*E*)-3-(naphthalen-2-yl)but-2-enoate<sup>10</sup> according to Representative Procedure #2 and isolated by silica gel flash column chromatography (5% EtOAc/hexanes) as a colorless oil (0.26 g, 51% yield): <sup>1</sup>H NMR (400 MHz, CDCl<sub>3</sub>) δ 7.86 – 7.77 (m, 4H), 7.58 (dd, *J* = 8.6, 1.9 Hz, 1H), 7.52 – 7.42 (m, 2H), 6.12 – 6.05 (m, 1H), 4.92 (dq, *J* = 7.0, 0.7 Hz, 2H), 3.82 (s, 3H), 2.29 – 2.22 (m, 3H); <sup>13</sup>C NMR (101 MHz, CDCl<sub>3</sub>) δ 156.0, 140.9, 139.7, 133.4, 133.0, 128.3, 128.0, 127.7, 126.4, 126.1, 124.9, 124.3, 121.3, 65.2, 55.0, 16.5; IR (Neat Film, NaCl) 3057, 2952, 1752, 1740, 1596, 1467, 1442, 1382, 1248, 997, 941, 818, 794, 740 cm<sup>-1</sup>; HRMS (FAB+) *m/z* calc'd for C<sub>16</sub>H<sub>16</sub>O<sub>3</sub> [M]<sup>+</sup>: 256.1100, found 256.1095.

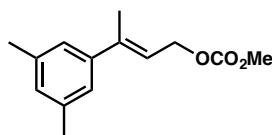

**(E)-3-(3,5-Dimethylphenyl)but-2-en-1-yl methyl carbonate (6k).** Carbonate **6k** was prepared from methyl (*E*)-3-(3,5-dimethylphenyl)but-2-enoate<sup>11</sup> according to Representative Procedure #2 and isolated by silica gel flash column chromatography (5% EtOAc/hexanes) as a colorless oil (0.32 g, 86% yield): <sup>1</sup>H NMR (400 MHz, CDCl<sub>3</sub>) δ 7.02 (dt, *J* = 1.6, 0.8 Hz, 2H), 6.93 (td, *J* = 1.6, 0.8 Hz, 1H), 5.96 – 5.82 (m, 1H), 4.84 (dd, *J* = 7.0, 0.8 Hz, 2H), 3.80 (s, 3H), 2.31 (d, *J* = 0.7 Hz, 6H), 2.15 – 2.06 (m, 3H); <sup>13</sup>C NMR (101 MHz, CDCl<sub>3</sub>) δ 156.0, 142.6, 141.5, 137.9, 129.4, 123.9, 120.4, 65.1, 54.9, 21.5, 16.5; IR (Neat Film, NaCl) 2956, 2918, 2862, 1748, 1601, 1443, 1376, 1335, 1262, 944, 905, 849, 792, 699 cm<sup>-1</sup>; HRMS (FAB+) *m/z* calc'd for C<sub>14</sub>H<sub>18</sub>O<sub>3</sub> [M]<sup>+</sup>: 234.1256, found 234.1252.

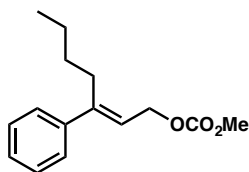

**(E)-Methyl (3-phenylhept-2-en-1-yl) carbonate (8b).** Carbonate **8b** was prepared from ethyl (*E*)-3-phenylhept-2-enoate<sup>12</sup> according to Representative Procedure #2 and isolated by silica gel flash column chromatography (5% EtOAc/hexanes) as a colorless oil (0.31 g, 58% yield): <sup>1</sup>H NMR (400 MHz, CDCl<sub>3</sub>) δ 7.48 – 7.27 (m, 5H), 5.89 – 5.71 (m, 1H), 4.84 (d, *J* = 7.0 Hz, 2H), 3.80 (s, 3H), 2.73 – 2.46 (m, 2H), 1.41 – 1.24 (m, 4H), 1.06 – 0.73 (m, 3H); <sup>13</sup>C NMR (101 MHz, CDCl<sub>3</sub>) δ 156.0, 146.6, 142.0, 128.4, 127.6, 126.6, 121.1, 65.0, 55.0, 31.2, 30.2, 22.7, 14.0; IR (Neat Film, NaCl) 3034, 2957, 2872, 1748, 1644, 1599,

1493, 1444, 1378, 1344, 1262, 1129, 941, 792, 766, 698 cm<sup>-1</sup>; HRMS (FAB+) *m/z* calc'd for C<sub>15</sub>H<sub>20</sub>O<sub>3</sub> [M]<sup>+</sup>: 248.1412, found 248.1424.

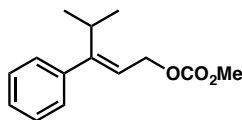

**(E)-Methyl (4-methyl-3-phenylpent-2-en-1-yl) carbonate (8c).** Carbonate **8c** was prepared from ethyl (*E*)-4-methyl-3-phenylpent-2-enoate<sup>13</sup> according to Representative Procedure #2 and isolated by silica gel flash column chromatography (5% EtOAc/hexanes) as a colorless oil (0.17 g, 17% yield): <sup>1</sup>H NMR (400 MHz, CDCl<sub>3</sub>) δ 7.37 – 7.27 (m, 3H), 7.11 – 7.02 (m, 2H), 5.61 (td, *J* = 7.0, 1.3 Hz, 1H), 4.46 (dd, *J* = 7.0, 0.8 Hz, 2H), 3.75 (s, 3H), 2.66 – 2.54 (m, 1H), 1.03 (d, *J* = 6.8 Hz, 6H); <sup>13</sup>C NMR (101 MHz, CDCl<sub>3</sub>) δ 155.8, 154.0, 139.7, 128.5, 128.2, 127.3, 117.8, 66.1, 54.8, 36.0, 21.5; IR (Neat Film, NaCl) 2961, 2872, 1749, 1492, 1442, 1263, 942, 792, 771, 703 cm<sup>-1</sup>; HRMS (FAB+) *m/z* calc'd for C<sub>14</sub>H<sub>19</sub>O<sub>3</sub> [M+H]<sup>+</sup>: 235.1334, found 235.1344.

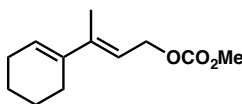

**(E)-3-(Cyclohex-1-en-1-yl)but-2-en-1-yl methyl carbonate (8e).** Carbonate **8e** was prepared from ethyl (*E*)-3-(cyclohex-1-en-1-yl)but-2-enoate<sup>14</sup> according to Representative Procedure #2 and isolated by silica gel flash column chromatography (5% EtOAc/hexanes) as a colorless oil (0.25 g, 73% yield): <sup>1</sup>H NMR (400 MHz, CDCl<sub>3</sub>) δ 6.00 – 5.92 (m, 1H), 5.68 – 5.55 (m, 1H), 4.79 (d, *J* = 7.0 Hz, 2H), 3.78 (s, 3H), 2.16 (ddd, *J* = 12.0, 5.9, 3.7 Hz, 4H), 1.85 (d, *J* = 1.1 Hz, 3H), 1.73 – 1.49 (m, 4H); <sup>13</sup>C NMR (101 MHz, CDCl<sub>3</sub>) δ 156.0, 141.2, 137.0, 126.0, 116.8, 65.5, 54.9, 26.1, 25.8, 23.0, 22.3, 14.1; IR (Neat Film, NaCl) 2929, 2859, 1749, 1638, 1443, 1263, 1119, 940, 792 cm<sup>-1</sup>; HRMS (FAB+) *m/z* calc'd for C<sub>12</sub>H<sub>18</sub>O<sub>3</sub> [M]<sup>+</sup>: 210.1256, found 210.1252.

### General Procedure for Optimization of the Ir-Catalyzed Allylic Alkylation (Table 1)

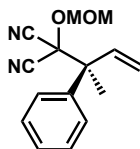

**(S)-2-(Methoxymethoxy)-2-(2-phenylbut-3-en-2-yl)malononitrile (3).** In a nitrogen-filled glove box, to a 1 dram vial (vial A) equipped with a stir bar was added [Ir(cod)Cl]<sub>2</sub> (1.3 mg, 0.0020 mmol, 2 mol %), ligand (*S<sub>a</sub>*)-**L3** (2.5 mg, 0.0042 mmol, 4.2 mol %), TBD (1.4 mg, 0.010 mmol, 10 mol %), and THF (0.5 mL). Vial A was stirred at 25 °C (ca. 10 min) while another 1 dram vial (vial B) was charged with MAC nucleophile **1** (0.10 mmol or 0.20 mmol, as specified), THF (0.5 mL), and the Lewis acid additive (200 mol %). The

pre-formed catalyst solution (vial A) was then transferred to vial B followed immediately by carbonate **2** (0.20 mmol, 0.10 mmol, or 0.12 mmol, as specified). The vial was sealed and stirred at 60 °C. After 18 h, the vial was removed from the glove box and filtered through a pad of silica, rinsing with EtOAc. The crude mixture was concentrated and 1,2,4,5-tetrachloro-3-nitrobenzene (0.10 mmol in 0.5 mL CDCl<sub>3</sub>) was added. The NMR yield (measured in reference to 1,2,4,5-tetrachloro-3-nitrobenzene  $\delta$  7.74 ppm (s, 1H)) was determined by <sup>1</sup>H NMR analysis of the crude mixture. The residue was purified by preparatory TLC (15% EtOAc/hexanes) to afford MAC adduct product **3** as a colorless oil. For the purposes of characterization, product **3** was further purified by preparatory HPLC (20% EtOAc/hexanes, Viridis SFC 2-Ethylpyridine 5  $\mu$ m column, flow rate = 1.5 mL/min;  $\lambda$  = 230 nm): 94% ee (entry 9);  $[\alpha]_D^{25} +11.7$  (c 0.07, CHCl<sub>3</sub>) (entry 9); <sup>1</sup>H NMR (400 MHz, CDCl<sub>3</sub>)  $\delta$  7.61 – 7.54 (m, 2H), 7.42 – 7.32 (m, 3H), 6.51 (dd, *J* = 17.4, 11.0 Hz, 1H), 5.59 – 5.34 (m, 2H), 5.02 (s, 2H), 3.42 (s, 3H), 1.84 (s, 3H); <sup>13</sup>C NMR (101 MHz, CDCl<sub>3</sub>)  $\delta$  138.3, 137.6, 129.0, 128.57, 238.55, 128.3, 125.2, 119.2, 112.8, 112.7, 96.7, 73.9, 57.5, 52.8, 20.9; IR (Neat Film, NaCl) 3062, 2957, 2896, 2242, 2189, 1750, 1492, 1445, 1358, 1268, 1161, 1108, 1030, 930, 751, 698 cm<sup>-1</sup>; HRMS (ESI+) *m/z* calc'd for C<sub>15</sub>H<sub>17</sub>N<sub>2</sub>O<sub>2</sub> [M+H]<sup>+</sup>: 257.1290, found 257.1313; HPLC conditions: 1% IPA, 1.0 mL/min, Chiralpak IC column,  $\lambda$  = 210 nm, *t<sub>R</sub>* (min): major = 13.303, minor = 17.243.

### General Procedure for the Enantioenriched Carboxylic Acid Synthesis

*Please note* that the absolute configuration was determined only for compound **7h** via x-ray crystallographic analysis. The absolute configuration for all other products has been inferred by analogy. For respective HPLC and SFC conditions, please refer to Table S1.

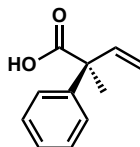

**(S)-2-Methyl-2-phenylbut-3-enoic acid (7a).** In a nitrogen-filled glove box, to a 1 dram vial (vial A) equipped with a stir bar was added [Ir(cod)Cl]<sub>2</sub> (2.7 mg, 0.0040 mmol, 2 mol %), ligand (*S<sub>a</sub>*)-**L3** (4.9 mg, 0.0084 mmol, 4.2 mol %), TBD (2.8 mg, 0.020 mmol, 10 mol %), and THF (1 mL). Vial A was stirred at 25 °C (ca. 10 min) while another 1 dram vial (vial B) was charged with MAC nucleophile **1** (25 mg, 0.20 mmol, 100 mol %), THF (1 mL), and BEt<sub>3</sub> (400  $\mu$ L, 1M in hexanes). The pre-formed catalyst solution (vial A) was then transferred to vial B followed immediately by carbonate **2** (83 mg, 0.40 mmol, 200 mol %). The vial was sealed and stirred at 60 °C. After 18 h or 48 h, the vial was removed from the glove box, transferred to a 20 mL vial with CH<sub>2</sub>Cl<sub>2</sub>, and concentrated. The crude material was heated at 80 °C in 6M HCl (4 mL) for 18 h. Whereupon, the reaction mixture was cooled to 0 °C and basified with 6M NaOH (4.5 mL). The aqueous layer was extracted with CH<sub>2</sub>Cl<sub>2</sub> (4 x 8 mL). The combined organic layers were washed with 2M NaOH (8 mL). The combined aqueous layers were acidified with concentrated HCl, extracted with CH<sub>2</sub>Cl<sub>2</sub> (4 x 8 mL), dried over Na<sub>2</sub>SO<sub>4</sub>, and concentrated under reduced pressure at 0 °C to give the product **7a** as a colorless solid (27 mg, 77% yield): 95% ee;  $[\alpha]_D^{25} +13.5$  (c 1.3,



CHCl<sub>3</sub>); HPLC conditions: 2% IPA, 1.0 mL/min, Chiralpak AD–H column,  $\lambda = 210$  nm,  $t_R$  (min): major = 12.198, minor = 11.426. Characterization data match those reported in the literature.<sup>15</sup> *Please note* Compounds **7i**, **7j**, **7k**, and **9a–9g** were prepared at the same concentration with double catalyst loadings.

### Spectroscopic Data for the Enantioenriched Carboxylic Acids

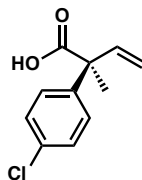

**(S)-2-(4-Chlorophenyl)-2-methylbut-3-enoic acid (7b).** Product **7b** was prepared according to the general procedure to give a pale yellow oil (33 mg, 80% yield): 93% ee;  $[\alpha]_D^{25} +8.1$  ( $c$  1.8, CHCl<sub>3</sub>); <sup>1</sup>H NMR (400 MHz, CDCl<sub>3</sub>)  $\delta$  7.38 – 7.24 (m, 4H), 6.38 (dd,  $J = 17.5, 10.7$  Hz, 1H), 5.44 – 5.16 (m, 2H), 1.66 (s, 3H); <sup>13</sup>C NMR (101 MHz, CDCl<sub>3</sub>)  $\delta$  180.4, 141.1, 140.1, 133.3, 128.7, 128.3, 116.1, 53.3, 23.3; IR (Neat Film, NaCl) 3089, 2987, 2645, 2539, 1705, 1493, 1400, 1282, 1097, 1014, 928, 826, 755 cm<sup>-1</sup>; HRMS (FAB+)  $m/z$  calc'd for C<sub>11</sub>H<sub>12</sub>O<sub>2</sub>Cl [M+H]<sup>+</sup>: 211.0526, found 211.0528; HPLC conditions: 2% IPA, 1.0 mL/min, Chiralpak AD–H column,  $\lambda = 210$  nm,  $t_R$  (min): major = 15.642, minor = 14.104.

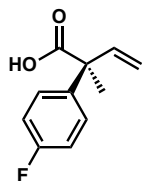

**(S)-2-(4-Fluorophenyl)-2-methylbut-3-enoic acid (7c).** Product **7c** was prepared according to the general procedure to give a pale yellow oil (35 mg, 90% yield): 90% ee;  $[\alpha]_D^{25} +3.4$  ( $c$  1.5, CHCl<sub>3</sub>); <sup>1</sup>H NMR (400 MHz, CDCl<sub>3</sub>)  $\delta$  7.46 – 7.19 (m, 2H), 7.05 (t,  $J = 8.7$  Hz, 2H), 6.39 (dd,  $J = 17.5, 10.7$  Hz, 1H), 5.42 – 5.14 (m, 2H), 1.67 (s, 3H); <sup>13</sup>C NMR (101 MHz, CDCl<sub>3</sub>)  $\delta$  180.6, 163.2, 160.7, 140.4, 138.3 (d,  $J = 3.4$  Hz), 128.5 (d,  $J = 8.1$  Hz), 115.9, 115.5, 115.3, 53.2, 23.5; IR (Neat Film, NaCl) 3088, 2987, 2924, 2642, 1704, 1603, 1510, 1462, 1412, 1277, 1234, 1165, 928, 833, 816, 735 cm<sup>-1</sup>; HRMS (FAB+)  $m/z$  calc'd for C<sub>11</sub>H<sub>12</sub>FO<sub>2</sub> [M+H]<sup>+</sup>: 195.0833, found 195.0841; HPLC conditions: 2% IPA, 1.0 mL/min, Chiralpak AD–H column,  $\lambda = 210$  nm,  $t_R$  (min): major = 15.499, minor = 13.811.

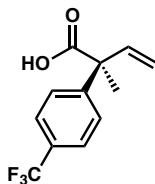

**(S)-2-Methyl-2-(4-(trifluoromethyl)phenyl)but-3-enoic acid (7d).** Product **7d** was prepared according to the general procedure to give a pale yellow oil (41 mg, 83% yield): 92% ee;  $[\alpha]_D^{25} -2.2$  (*c* 2.3, CHCl<sub>3</sub>); <sup>1</sup>H NMR (400 MHz, CDCl<sub>3</sub>) δ 7.60 (dt, *J* = 8.1, 0.8 Hz, 2H), 7.45 (dt, *J* = 8.3, 0.8 Hz, 2H), 6.38 (dd, *J* = 17.5, 10.7 Hz, 1H), 5.48 – 5.09 (m, 2H), 1.68 (s, 3H); <sup>13</sup>C NMR (101 MHz, CDCl<sub>3</sub>) δ 179.0, 146.6, 139.7, 129.6, 130.0, 129.5, 127.2, 125.6 (q, *J* = 3.7 Hz), 122.8, 116.6, 53.7, 29.9, 23.4; IR (Neat Film, NaCl) 2926, 2649, 1707, 1618, 1413, 1328, 1277, 1167, 1126, 1081, 1016, 930, 940 cm<sup>-1</sup>; HRMS (FAB+) *m/z* calc'd for C<sub>12</sub>H<sub>12</sub>O<sub>2</sub>F<sub>3</sub> [M+H]<sup>+</sup>: 245.0789, found 245.0794; SFC conditions: 2% IPA, 2.5 mL/min, Chiralpak AD–H column, λ = 210 nm, *t*<sub>R</sub> (min): major = 13.592, minor = 15.745.

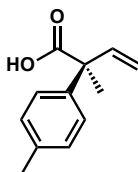

**(S)-2-Methyl-2-(p-tolyl)but-3-enoic acid (7e).** Product **7e** was prepared according to the general procedure to give a pale yellow oil (24 mg, 63% yield): 94% ee;  $[\alpha]_D^{25} +4.6$  (*c* 0.8, CHCl<sub>3</sub>); <sup>1</sup>H NMR (400 MHz, CDCl<sub>3</sub>) δ 7.42 – 7.01 (m, 4H), 6.40 (dd, *J* = 17.5, 10.7 Hz, 1H), 5.59 – 5.08 (m, 2H), 2.34 (s, 3H), 1.64 (s, 3H); <sup>13</sup>C NMR (101 MHz, CDCl<sub>3</sub>) δ 181.0, 140.7, 139.8, 137.0, 129.3, 126.6, 115.4, 53.3, 23.3, 21.1; IR (Neat Film, NaCl) 2986, 1702, 1636, 1512, 1457, 1412, 1276, 1191, 1132, 1077, 1020, 925, 815, 730 cm<sup>-1</sup>; HRMS (ESI-) *m/z* calc'd for C<sub>12</sub>H<sub>13</sub>O<sub>2</sub> [M-H]<sup>-</sup>: 189.0916, found 189.0903; HPLC conditions: 2% IPA, 1.0 mL/min, Chiralpak AD–H column, λ = 210 nm, *t*<sub>R</sub> (min): major = 15.393, minor = 14.288.

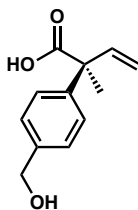

**(S)-2-(4-(Hydroxymethyl)phenyl)-2-methylbut-3-enoic acid (7f).** Product **7f** was prepared according to the general procedure and isolated by preparatory TLC (30% acetone/hexanes) to give a colorless solid (21 mg, 51% yield): 95% ee;  $[\alpha]_D^{25} +3.4$  (*c* 0.5, CHCl<sub>3</sub>); <sup>1</sup>H NMR (400 MHz, CDCl<sub>3</sub>) δ 7.33 (q, *J* = 8.2 Hz, 4H), 6.37 (dd, *J* = 17.5, 10.7 Hz, 1H), 5.39 – 5.10 (m, 2H), 4.57 (s, 2H), 1.63 (s, 3H); <sup>13</sup>C NMR (101 MHz, CDCl<sub>3</sub>) δ

180.1, 143.2, 140.4, 136.4, 128.8, 127.2, 115.8, 53.6, 45.9, 23.4; IR (Neat Film, NaCl) 2985, 2927, 2642, 1703, 1636, 1512, 1460, 1268, 1182, 1076, 926, 836, 731, 683  $\text{cm}^{-1}$ ; HRMS (FAB+)  $m/z$  calc'd for  $\text{C}_{12}\text{H}_{15}\text{O}_3$   $[\text{M}+\text{H}]^+$ : 207.1021, found 207.1025; HPLC conditions: 2% IPA, 1.0 mL/min, Chiralpak AD-H column,  $\lambda = 210$  nm,  $t_{\text{R}}$  (min): major = 15.258, minor = 14.667.

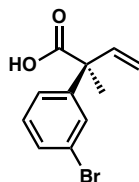

**(S)-2-(3-Bromophenyl)-2-methylbut-3-enoic acid (7g).** Product **7g** was prepared according to the general procedure to give a pale yellow oil (35 mg, 69% yield): 92% ee;  $[\alpha]_{\text{D}}^{25} -2.6$  ( $c$  1.8,  $\text{CHCl}_3$ );  $^1\text{H}$  NMR (400 MHz,  $\text{CDCl}_3$ )  $\delta$  7.47 (t,  $J = 1.9$  Hz, 1H), 7.41 (ddd,  $J = 7.6, 1.9, 1.2$  Hz, 1H), 7.29 – 7.18 (m, 2H), 6.35 (dd,  $J = 17.5, 10.7$  Hz, 1H), 5.42 – 5.09 (m, 2H), 1.65 (s, 3H);  $^{13}\text{C}$  NMR (101 MHz,  $\text{CDCl}_3$ )  $\delta$  179.7, 145.0, 139.8, 130.5, 130.2, 129.9, 125.5, 122.8, 116.4, 53.5, 23.3; IR (Neat Film, NaCl) 2987, 2644, 1705, 1593, 1566, 1475, 1413, 1280, 1129, 1070, 997, 928, 785, 760, 700  $\text{cm}^{-1}$ ; HRMS (ESI-)  $m/z$  calc'd for  $\text{C}_{11}\text{H}_{10}\text{O}_2\text{Br}$   $[\text{M}-\text{H}]^-$ : 252.9864, found 252.9864; HPLC conditions: 2% IPA, 1.0 mL/min, Chiralpak AD-H column,  $\lambda = 210$  nm,  $t_{\text{R}}$  (min): major = 15.217, minor = 14.439.

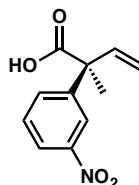

**(S)-2-Methyl-2-(3-nitrophenyl)but-3-enoic acid (7h).** Product **7h** was prepared according to the general procedure to give a colorless solid (41 mg, 93% yield): 87% ee;  $[\alpha]_{\text{D}}^{25} +94.5$  ( $c$  3.4,  $\text{CHCl}_3$ );  $^1\text{H}$  NMR (400 MHz,  $\text{CDCl}_3$ )  $\delta$  8.22 (t,  $J = 2.0$  Hz, 1H), 8.15 (ddd,  $J = 8.2, 2.2, 1.0$  Hz, 1H), 7.69 (ddd,  $J = 7.9, 1.9, 1.1$  Hz, 1H), 7.53 (t,  $J = 8.0$  Hz, 1H), 6.38 (dd,  $J = 17.5, 10.7$  Hz, 1H), 5.59 – 5.11 (m, 2H), 1.72 (s, 3H);  $^{13}\text{C}$  NMR (101 MHz,  $\text{CDCl}_3$ )  $\delta$  179.6, 148.5, 144.7, 139.2, 133.3, 129.6, 122.5, 122.1, 117.2, 53.7, 23.4; IR (Neat Film, NaCl) 3089, 2988, 2924, 2641, 1707, 1530, 1351, 1276, 1106, 929, 808, 738, 688  $\text{cm}^{-1}$ ; HRMS (FAB+)  $m/z$  calc'd for  $\text{C}_{11}\text{H}_{12}\text{O}_4\text{N}$   $[\text{M}+\text{H}]^+$ : 222.0766, found 222.0769; HPLC conditions: 3% IPA, 1.0 mL/min, Chiralpak AD-H column,  $\lambda = 210$  nm,  $t_{\text{R}}$  (min): major = 24.060, minor = 20.907.

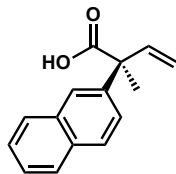

**(S)-2-Methyl-2-(naphthalen-2-yl)but-3-enoic acid (7i).** Product **7i** was prepared according to the general procedure to give a pale yellow oil (30 mg, 66% yield): 92% ee;  $[\alpha]_D^{25} +7.8$  (*c* 0.6, CHCl<sub>3</sub>); <sup>1</sup>H NMR (400 MHz, CDCl<sub>3</sub>) δ 7.91 – 7.72 (m, 4H), 7.55 – 7.39 (m, 3H), 6.52 (dd, *J* = 17.5, 10.7 Hz, 1H), 5.57 – 5.11 (m, 2H), 1.77 (s, 3H); <sup>13</sup>C NMR (101 MHz, CDCl<sub>3</sub>) δ 180.9, 140.5, 140.0, 133.3, 132.5, 128.3, 128.2, 127.6, 126.3, 126.2, 125.3, 125.2, 116.0, 53.9, 23.4; IR (Neat Film, NaCl) 3057, 2984, 1701, 1506, 1458, 1411, 1274, 1182, 1128, 1102, 925, 856, 816, 747 cm<sup>-1</sup>; HRMS (FAB+) *m/z* calc'd for C<sub>15</sub>H<sub>14</sub>O<sub>2</sub> [M]<sup>+</sup>: 226.0994, found 226.0992; HPLC conditions: 2% IPA, 1.0 mL/min, Chiralpak AD–H column, λ = 210 nm, *t<sub>R</sub>* (min): major = 28.272, minor = 24.870.

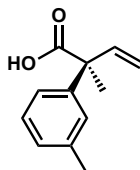

**(S)-2-Methyl-2-(*m*-tolyl)but-3-enoic acid (7j).** Product **7j** was prepared according to the general procedure to give a pale yellow oil (26 mg, 68% yield): 93% ee;  $[\alpha]_D^{25} +5.2$  (*c* 1.6, CHCl<sub>3</sub>); <sup>1</sup>H NMR (400 MHz, CDCl<sub>3</sub>) δ 7.25 – 7.04 (m, 4H), 6.40 (dd, *J* = 17.5, 10.7 Hz, 1H), 5.45 – 5.08 (m, 2H), 2.44 – 2.20 (m, 3H), 1.65 (s, 3H); <sup>13</sup>C NMR (101 MHz, CDCl<sub>3</sub>) δ 180.2, 142.7, 140.6, 138.3, 128.5, 128.1, 127.3, 123.7, 115.6, 53.6, 23.3, 21.7; IR (Neat Film, NaCl) 2984, 2923, 2648, 1703, 1606, 1459, 1411, 1275, 1178, 1127, 1002, 926, 785, 703 cm<sup>-1</sup>; HRMS (FAB+) *m/z* calc'd for C<sub>12</sub>H<sub>15</sub>O<sub>2</sub> [M+H]<sup>+</sup>: 191.1072, found 191.1074; HPLC conditions: 2% IPA, 1.0 mL/min, Chiralpak AD–H column, λ = 210 nm, *t<sub>R</sub>* (min): major = 13.800, minor = 12.388.

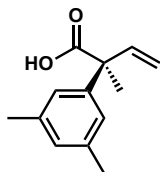

**(S)-2-(3,5-Dimethylphenyl)-2-methylbut-3-enoic acid (7k).** Product **7k** was prepared according to the general procedure and isolated by preparatory TLC (30% acetone/hexanes) to give a colorless oil (13 mg, 32% yield): 85% ee;  $[\alpha]_D^{25} -40.6$  (*c* 0.1, CHCl<sub>3</sub>); <sup>1</sup>H NMR (400 MHz, CDCl<sub>3</sub>) δ 6.94 (d, *J* = 8.5 Hz, 3H), 6.42 (dd, *J* = 17.4, 10.6 Hz, 1H), 5.45 – 5.08 (m, 2H), 2.33 (s, 6H), 1.65 (s, 3H); <sup>13</sup>C NMR (101 MHz, CDCl<sub>3</sub>) δ 180.5, 142.8, 140.8, 138.1, 129.0, 124.4, 115.3, 53.6, 23.3, 21.6; IR (Neat Film, NaCl) 2983, 2919, 2639, 1700, 1602, 1411, 1279, 1125, 923, 848, 708 cm<sup>-1</sup>; HRMS (FAB+) *m/z*

calc'd for C<sub>13</sub>H<sub>17</sub>O<sub>2</sub> [M+H]<sup>+</sup>: 205.1229, found 205.1233; HPLC conditions: 2% IPA, 1.0 mL/min, Chiralpak AD–H column, λ = 210 nm, t<sub>R</sub> (min): major = 11.107, minor = 10.064. Please note an HMBC has been included due to the low intensity of the carbonyl <sup>13</sup>C shift at δ 180.5.

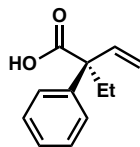

**(S)-2-Ethyl-2-phenylbut-3-enoic acid (9a).** Product **9a** was prepared according to the general procedure and isolated by preparatory TLC (30% acetone/hexanes) to give a colorless oil (23 mg, 61% yield): 92% ee; [α]<sub>D</sub><sup>25</sup> +17.4 (*c* 0.4, CHCl<sub>3</sub>); <sup>1</sup>H NMR (400 MHz, CDCl<sub>3</sub>) δ 7.38 – 7.22 (m, 5H), 6.36 (dd, *J* = 17.7, 10.9 Hz, 1H), 5.35 (d, *J* = 10.7 Hz, 1H), 5.09 (d, *J* = 17.6 Hz, 1H), 2.36 – 2.00 (m, 2H), 0.87 (t, *J* = 7.2 Hz, 3H); <sup>13</sup>C NMR (101 MHz, CDCl<sub>3</sub>) δ 180.1, 141.3, 139.1, 128.4, 127.6, 127.2, 116.9, 58.0, 29.4, 9.4; IR (Neat Film, NaCl) 3060, 2970, 2928, 2636, 1702, 1495, 1448, 1407, 1381, 1261, 1083, 924, 761, 700 cm<sup>-1</sup>; HRMS (FAB+) *m/z* calc'd for C<sub>12</sub>H<sub>15</sub>O<sub>2</sub> [M+H]<sup>+</sup>: 191.1072, found 191.1071; HPLC conditions: 1.5% IPA, 1.0 mL/min, two Chiralpak AD–H columns in series, λ = 210 nm, t<sub>R</sub> (min): major = 46.253, minor = 47.271.

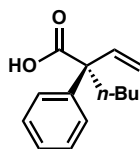

**(S)-2-Phenyl-2-vinylhexanoic acid (9b).** Product **9b** was prepared according to the general procedure and isolated by preparatory TLC (30% acetone/hexanes) to give a colorless oil (6 mg, 14% yield): 95% ee; [α]<sub>D</sub><sup>25</sup> –106.0 (*c* 0.07, CHCl<sub>3</sub>); <sup>1</sup>H NMR (400 MHz, CDCl<sub>3</sub>) δ 7.40 – 7.29 (m, 5H), 6.38 (dd, *J* = 17.6, 10.9 Hz, 1H), 5.32 (dd, *J* = 10.9, 0.9 Hz, 1H), 5.06 (dd, *J* = 17.6, 0.9 Hz, 1H), 2.28 – 1.98 (m, 2H), 1.44 – 1.14 (m, 4H), 0.87 (t, *J* = 7.2 Hz, 3H); <sup>13</sup>C NMR (101 MHz, CDCl<sub>3</sub>) δ 178.4, 141.6, 139.7, 128.4, 127.5, 127.1, 116.6, 57.5, 36.5, 27.0, 23.4, 14.1; IR (Neat Film, NaCl) 2956, 2920, 2851, 1734, 1706, 1466, 1378, 1260, 1098, 925, 800, 722, 700 cm<sup>-1</sup>; HRMS (FAB+) *m/z* calc'd for C<sub>14</sub>H<sub>19</sub>O<sub>2</sub> [M+H]<sup>+</sup>: 219.1385, found 219.1291; SFC conditions: 5% IPA, 2.5 mL/min, Chiralpak AD–H column, λ = 210 nm, t<sub>R</sub> (min): major = 10.646, minor = 11.952.

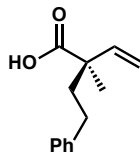

**(R)-2-Methyl-2-phenethylbut-3-enoic acid (9f).** Product **9f** was prepared according to the general procedure and isolated by preparatory TLC (33% acetone/hexanes) to give a colorless oil (13 mg, 32% yield): 3% ee;  $[\alpha]_D^{25} -12.1$  (*c* 0.7, CHCl<sub>3</sub>); <sup>1</sup>H NMR (400 MHz, CDCl<sub>3</sub>) δ 7.44 – 7.04 (m, 5H), 6.10 (dd, *J* = 17.6, 10.7 Hz, 1H), 5.21 (dd, *J* = 14.0, 3.3 Hz, 2H), 2.60 (dt, *J* = 11.0, 4.9 Hz, 2H), 2.33 – 1.79 (m, 2H), 1.40 (s, 3H); <sup>13</sup>C NMR (101 MHz, CDCl<sub>3</sub>) δ 182.0, 142.0, 140.9, 128.54, 128.49, 126.1, 114.7, 48.7, 41.1, 31.2, 20.7; IR (Neat Film, NaCl) 3026, 2927, 1702, 1496, 1454, 1380, 1264, 1097, 925, 748, 700 cm<sup>-1</sup>; HRMS (FAB+) *m/z* calc'd for C<sub>13</sub>H<sub>17</sub>O<sub>2</sub> [M+H]<sup>+</sup>: 267.1385, found 267.1376; HPLC conditions: 2% IPA, 1.0 mL/min, Chiralpak AD–H column, λ = 210 nm, *t*<sub>R</sub> (min): major = 18.485, minor = 14.652. *Please note* an HMBC has been included due to the low intensity of the carbonyl <sup>13</sup>C shift at δ 182.0.

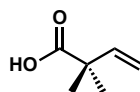

**2,2-Dimethylbut-3-enoic acid (9g).** Product **9g** was prepared according to the general procedure to give a colorless oil (15 mg, 63% yield). Characterization data match those reported in the literature.<sup>16</sup>

**Determination of Enantiomeric Excess***Please note* racemic products were synthesized using racemic **L3**.

Table S1: Determination of Enantiomeric Excess

| Entry | Product                                                                             | Assay Conditions                                         | Retention time of major isomer (min) | Retention time of minor isomer (min) | %ee |
|-------|-------------------------------------------------------------------------------------|----------------------------------------------------------|--------------------------------------|--------------------------------------|-----|
| 1     | 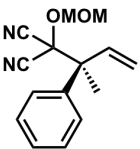   | HPLC<br>Chiralpak IC<br>1% IPA<br>isocratic, 1 mL/min    | 13.303                               | 17.243                               | 94% |
| 2     |    | HPLC<br>Chiralpak AD-H<br>2% IPA<br>isocratic, 1 mL/min  | 12.198                               | 11.426                               | 95% |
| 3     |   | HPLC<br>Chiralpak AD-H<br>2% IPA<br>isocratic, 1 mL/min  | 15.642                               | 14.104                               | 93% |
| 4     |  | HPLC<br>Chiralpak AD-H<br>2% IPA<br>isocratic, 1 mL/min  | 15.499                               | 13.811                               | 90% |
| 5     |  | SFC<br>Chiralpak AD-H<br>2% IPA<br>isocratic, 2.5 mL/min | 13.592                               | 15.745                               | 92% |
| 6     |  | HPLC<br>Chiralpak AD-H<br>2% IPA<br>isocratic, 1 mL/min  | 15.393                               | 14.288                               | 94% |

| Entry | Product                                                                             | Assay Conditions                                                        | Retention time of major isomer (min) | Retention time of minor isomer (min) | %ee |
|-------|-------------------------------------------------------------------------------------|-------------------------------------------------------------------------|--------------------------------------|--------------------------------------|-----|
| 7     | 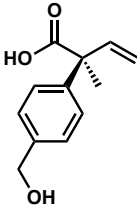   | HPLC<br>Chiralpak AD-H<br>2% IPA<br>isocratic, 1 mL/min                 | 15.258                               | 14.667                               | 95% |
| 8     |    | HPLC<br>Chiralpak AD-H<br>2% IPA<br>isocratic, 1 mL/min                 | 15.217                               | 14.439                               | 92% |
| 9     |   | HPLC<br>Chiralpak AD-H<br>3% IPA<br>isocratic, 1 mL/min                 | 24.060                               | 20.907                               | 87% |
| 10    |  | HPLC<br>Chiralpak AD-H<br>2% IPA<br>isocratic, 1 mL/min                 | 28.272                               | 24.870                               | 92% |
| 11    |  | HPLC<br>Chiralpak AD-H<br>2% IPA<br>isocratic, 1 mL/min                 | 13.800                               | 12.388                               | 93% |
| 12    |  | HPLC<br>Chiralpak AD-H<br>2% IPA<br>isocratic, 1 mL/min                 | 11.107                               | 10.064                               | 85% |
| 13    |  | HPLC<br>two Chiralpak AD-H in series<br>1.5% IPA<br>isocratic, 1 mL/min | 46.253                               | 47.271                               | 92% |



| Entry | Product                                                                           | Assay Conditions                                         | Retention time of major isomer (min) | Retention time of minor isomer (min) | %ee |
|-------|-----------------------------------------------------------------------------------|----------------------------------------------------------|--------------------------------------|--------------------------------------|-----|
| 14    | 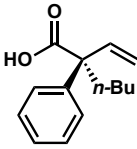 | SFC<br>Chiralpak AD-H<br>5% IPA<br>isocratic, 2.5 mL/min | 10.646                               | 11.952                               | 95% |
| 15    |  | HPLC<br>Chiralpak AD-H<br>2% IPA<br>isocratic, 1 mL/min  | 18.485                               | 14.652                               | 3%  |

### Experimental Procedures and Spectroscopic Data for the One-pot Syntheses of Carboxylic Acid Derivatives

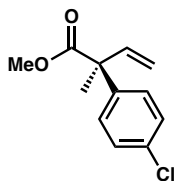

**Methyl (*S*)-2-(4-chlorophenyl)-2-methylbut-3-enoate (10).** In a nitrogen-filled glove box, to a scintillation vial (vial A) equipped with a stir bar was added [Ir(cod)Cl]<sub>2</sub> (13 mg, 0.02 mmol, 2 mol %), ligand (*S<sub>a</sub>*)-**L3** (25 mg, 0.042 mmol, 4.2 mol %), TBD (14 mg, 0.10 mmol, 10 mol %), and THF (5 mL). Vial A was stirred at 25 °C (ca. 10 min) while another scintillation vial (vial B) was charged with MAC nucleophile **1** (126 mg, 1.0 mmol, 100 mol %), THF (5 mL), and BEt<sub>3</sub> (2.0 mL, 1M in hexanes). The pre-formed catalyst solution (vial A) was then transferred to vial B followed immediately by carbonate **6b** (480 mg, 2.0 mmol, 200 mol %). The vial was sealed and stirred at 60 °C. After 18 h, the vial was removed from the glove box and the reaction mixture was concentrated under reduced pressure.

To the vial of crude MAC adduct equipped with a stir bar and septum cap was added 1:1 AcOH/DME (2 mL, 0.5 M) and CSA (0.26 g, 1.1 mmol, 1.1 equiv) under a nitrogen atmosphere. The reaction was heated to 60 °C for 6 h, whereupon the reaction mixture was cooled to ambient temperature, diluted with anhydrous MeOH (2.8 mL), and cooled to –40 °C. A solution of 1:1 MeOH/Et<sub>3</sub>N (5.6 mL, 20.1 equiv of Et<sub>3</sub>N) was added dropwise over 10 min. The reaction mixture was allowed to warm to ambient temperature over 18 h, whereupon the reaction was slowly quenched with saturated NH<sub>4</sub>Cl aqueous solution (5 mL). The aqueous layer was then extracted with CH<sub>2</sub>Cl<sub>2</sub> (3 x 10 mL) and the combined

organic layers were washed with brine (10 mL), dried over Na<sub>2</sub>SO<sub>4</sub>, and concentrated under reduced pressure at 0 °C. The crude residue was purified by silica gel flash column chromatography (10% EtOAc/hexanes) to give methyl ester **10** as a colorless oil (0.20 g, 88% yield): [ $\alpha$ ]<sub>D</sub><sup>25</sup> +1.5 (*c* 0.8, CHCl<sub>3</sub>); <sup>1</sup>H NMR (400 MHz, CDCl<sub>3</sub>)  $\delta$  7.41 – 6.99 (m, 4H), 6.35 (dd, *J* = 17.5, 10.7 Hz, 1H), 5.48 – 5.00 (m, 2H), 3.70 (s, 3H), 1.62 (s, 3H); <sup>13</sup>C NMR (101 MHz, CDCl<sub>3</sub>)  $\delta$  175.0, 142.0, 140.6, 132.9, 128.7, 128.1, 115.6, 53.5, 52.7, 23.7; IR (Neat Film, NaCl) 2986, 2952, 1734, 1637, 1493, 1459, 1246, 1181, 1123, 1098, 1014, 926, 828, 757 cm<sup>-1</sup>; HRMS (FAB+) *m/z* calc'd for C<sub>12</sub>H<sub>13</sub>ClO<sub>2</sub> [M]<sup>+</sup>: 224.0604, found 224.0621.

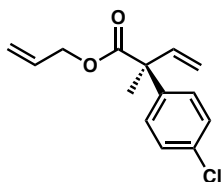

**Allyl (S)-2-(4-chlorophenyl)-2-methylbut-3-enoate (11).** In a nitrogen-filled glove box, to a 1 dram vial (vial A) equipped with a stir bar was added [Ir(cod)Cl]<sub>2</sub> (2.7 mg, 0.0040 mmol, 2 mol %), ligand (*S<sub>d</sub>*)-**L3** (4.9 mg, 0.0084 mmol, 4.2 mol %), TBD (2.8 mg, 0.020 mmol, 10 mol %), and THF (1 mL). Vial A was stirred at 25 °C (ca. 10 min) while another 1 dram vial (vial B) was charged with MAC nucleophile **1** (25 mg, 0.20 mmol, 100 mol %), THF (1 mL), and BEt<sub>3</sub> (400  $\mu$ L, 1M in hexanes). The pre-formed catalyst solution (vial A) was then transferred to vial B followed immediately by carbonate **6b** (96 mg, 0.40 mmol, 200 mol %). The vial was sealed and stirred at 60 °C. After 18 h, the vial was removed from the glove box, transferred to a 20 mL vial with CH<sub>2</sub>Cl<sub>2</sub>, and concentrated.

To the vial of crude MAC adduct equipped with a stir bar and septum cap was added 1:1 AcOH/DME (0.4 mL, 0.5 M) and CSA (51 mg, 0.22 mmol, 1.1 equiv) under a nitrogen atmosphere. The reaction was heated to 60 °C for 6 h, whereupon the reaction mixture was cooled to ambient temperature, diluted with allyl alcohol (0.4 mL), and cooled to 0 °C. A solution of 1:1 Et<sub>3</sub>N/allyl alcohol (1.1 mL, 20.4 equiv of Et<sub>3</sub>N) was added dropwise over 10 min. The reaction mixture was allowed to warm to ambient temperature over 18 h, whereupon the reaction was slowly quenched with saturated NH<sub>4</sub>Cl aqueous solution (5 mL). The aqueous layer was then extracted with CH<sub>2</sub>Cl<sub>2</sub> (3 x 10 mL) and the combined organic layers were washed with brine (10 mL), dried over Na<sub>2</sub>SO<sub>4</sub>, and concentrated under reduced pressure at 0 °C. The crude residue was purified by preparatory TLC (8% EtOAc/hexanes) to give allyl ester **11** as a colorless oil (37 mg, 74% yield): [ $\alpha$ ]<sub>D</sub><sup>25</sup> +0.4 (*c* 2.3, CHCl<sub>3</sub>); <sup>1</sup>H NMR (400 MHz, CDCl<sub>3</sub>)  $\delta$  7.35 – 7.12 (m, 4H), 6.36 (dd, *J* = 17.5, 10.7 Hz, 1H), 5.85 (ddt, *J* = 17.2, 10.5, 5.6 Hz, 1H), 5.38 – 5.02 (m, 4H), 4.61 (dt, *J* = 5.6, 1.4 Hz, 2H), 1.63 (s, 3H); <sup>13</sup>C NMR (101 MHz, CDCl<sub>3</sub>)  $\delta$  174.1, 142.0, 140.6, 132.9, 131.9, 128.6, 128.1, 118.5, 115.6, 65.9, 53.5, 23.6; IR (Neat Film, NaCl) 3089, 2985, 2930, 2857, 1900, 1734, 1638, 1493, 1236, 1177, 1122, 1097, 1014, 926, 828, 756 cm<sup>-1</sup>; HRMS (FAB+) *m/z* calc'd for C<sub>14</sub>H<sub>16</sub>O<sub>2</sub>Cl [M+H]<sup>+</sup>: 251.0839, found 251.0842.

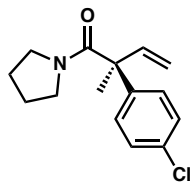

**(S)-2-(4-Chlorophenyl)-2-methyl-1-(pyrrolidin-1-yl)but-3-en-1-one (12).** In a nitrogen-filled glove box, to a 1 dram vial (vial A) equipped with a stir bar was added [Ir(cod)Cl]<sub>2</sub> (2.7 mg, 0.0040 mmol, 2 mol %), ligand (*S<sub>a</sub>*)-**L3** (4.9 mg, 0.0084 mmol, 4.2 mol %), TBD (2.8 mg, 0.020 mmol, 10 mol %), and THF (1 mL). Vial A was stirred at 25 °C (ca. 10 min) while another 1 dram vial (vial B) was charged with MAC nucleophile **1** (25 mg, 0.20 mmol, 100 mol %), THF (1 mL), and BEt<sub>3</sub> (400 μL, 1M in hexanes). The pre-formed catalyst solution (vial A) was then transferred to vial B followed immediately by carbonate **6b** (96 mg, 0.40 mmol, 200 mol %). The vial was sealed and stirred at 60 °C. After 18 h, the vial was removed from the glove box, transferred to a 20 mL vial with CH<sub>2</sub>Cl<sub>2</sub>, and concentrated.

To the vial of crude MAC adduct equipped with a stir bar and septum cap was added 1:1 AcOH/DME (0.4 mL, 0.5 M) and CSA (51 mg, 0.22 mmol, 1.1 equiv) under a nitrogen atmosphere. The reaction was heated to 60 °C for 6 h, whereupon the reaction mixture was cooled to ambient temperature, diluted with CH<sub>2</sub>Cl<sub>2</sub> (0.4 mL), and cooled to -40 °C. A solution of 1:1 pyrrolidine/CH<sub>2</sub>Cl<sub>2</sub> (0.67 mL, 20.4 equiv of pyrrolidine) was added dropwise over 10 min then Et<sub>3</sub>N (0.57 mL, 4.1 mmol, 20.4 equiv). The reaction mixture was allowed to warm to ambient temperature over 18 h, whereupon the reaction was slowly quenched with saturated NH<sub>4</sub>Cl aqueous solution (5 mL). The aqueous layer was then extracted with CH<sub>2</sub>Cl<sub>2</sub> (3 x 10 mL) and the combined organic layers were washed with brine (10 mL), dried over Na<sub>2</sub>SO<sub>4</sub>, and concentrated under reduced pressure at 0 °C. The crude residue was purified by preparatory TLC (30% acetone/hexanes) to give amide **12** as a colorless oil (32 mg, 61% yield): [α]<sub>D</sub><sup>25</sup> -49.5 (*c* 1.7, CHCl<sub>3</sub>); <sup>1</sup>H NMR (400 MHz, CDCl<sub>3</sub>) δ 7.34 – 7.28 (m, 2H), 7.21 – 7.14 (m, 2H), 6.45 (dd, *J* = 17.4, 10.7 Hz, 1H), 5.27 (dd, *J* = 10.7, 0.8 Hz, 1H), 5.10 (dd, *J* = 17.4, 0.8 Hz, 1H), 3.63 – 3.47 (m, 2H), 2.98 (dt, *J* = 10.6, 6.3 Hz, 1H), 2.52 (dt, *J* = 10.6, 6.7 Hz, 1H), 1.78 – 1.62 (m, 2H), 1.64 – 1.55 (m, 5H); <sup>13</sup>C NMR (101 MHz, CDCl<sub>3</sub>) δ 172.1, 143.2, 139.7, 132.5, 129.0, 127.6, 115.5, 54.3, 47.52, 47.44, 28.4, 26.5, 23.5; IR (Neat Film, NaCl) 2928, 2873, 1742, 1627, 1491, 1396, 1228, 1185, 1096, 1012, 921, 829, 723 cm<sup>-1</sup>; HRMS (FAB+) *m/z* calc'd for C<sub>15</sub>H<sub>19</sub>ClNO [M+H]<sup>+</sup>: 264.1155, found 264.1154.

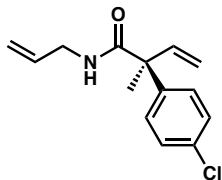

**(S)-N-allyl-2-(4-chlorophenyl)-2-methylbut-3-enamide (13).** In a nitrogen-filled glove box, to a 1 dram vial (vial A) equipped with a stir bar was added [Ir(cod)Cl]<sub>2</sub> (2.7 mg, 0.0040 mmol, 2 mol %), ligand (*S<sub>a</sub>*)-**L3** (4.9 mg, 0.0084 mmol, 4.2 mol %), TBD (2.8 mg,

0.020 mmol, 10 mol %), and THF (1 mL). Vial A was stirred at 25 °C (ca. 10 min) while another 1 dram vial (vial B) was charged with MAC nucleophile **1** (25 mg, 0.20 mmol, 100 mol %), THF (1 mL), and BEt<sub>3</sub> (400 μL, 1M in hexanes). The pre-formed catalyst solution (vial A) was then transferred to vial B followed immediately by carbonate **6b** (96 mg, 0.40 mmol, 200 mol %). The vial was sealed and stirred at 60 °C. After 18 h, the vial was removed from the glove box, transferred to a 20 mL vial with CH<sub>2</sub>Cl<sub>2</sub>, and concentrated.

To the vial of crude MAC adduct equipped with a stir bar and septum cap was added 1:1 AcOH/DME (0.4 mL, 0.5 M) and CSA (51 mg, 0.22 mmol, 1.1 equiv) under a nitrogen atmosphere. The reaction was heated to 60 °C for 6 h, whereupon the reaction mixture was cooled to ambient temperature, diluted with allyl amine (0.4 mL), and cooled to 0 °C. A solution of 1:1 Et<sub>3</sub>N/allyl amine (1.1 mL, 20.4 equiv of Et<sub>3</sub>N) was added dropwise over 10 min. The reaction mixture was allowed to warm to ambient temperature over 18 h, whereupon the reaction was slowly quenched with saturated NH<sub>4</sub>Cl aqueous solution (5 mL). The aqueous layer was then extracted with CH<sub>2</sub>Cl<sub>2</sub> (3 x 10 mL) and the combined organic layers were washed with brine (10 mL), dried over Na<sub>2</sub>SO<sub>4</sub>, and concentrated under reduced pressure at 0 °C. The crude residue was purified by preparatory TLC (30% EtOAc/hexanes) to give allyl amide **13** as a colorless oil (31 mg, 63% yield): [α]<sub>D</sub><sup>25</sup> +10.2 (*c* 1.6, CHCl<sub>3</sub>); <sup>1</sup>H NMR (400 MHz, CDCl<sub>3</sub>) δ 7.42 – 7.17 (m, 4H), 6.29 (dd, *J* = 17.4, 10.6 Hz, 1H), 5.90 – 5.75 (m, 1H), 5.64 (s, 1H), 5.33 (dd, *J* = 10.6, 0.8 Hz, 1H), 5.20 – 5.03 (m, 3H), 3.96 – 3.82 (m, 2H), 1.67 (s, 3H); <sup>13</sup>C NMR (101 MHz, CDCl<sub>3</sub>) δ 174.1, 142.0, 141.8, 134.1, 133.1, 128.9, 128.8, 116.6, 116.5, 54.3, 42.3, 24.6; IR (Neat Film, NaCl) 3341, 3085, 2983, 2931, 1739, 1658, 1520, 1493, 1414, 1270, 1096, 1014, 922, 827, 725, 657 cm<sup>-1</sup>; HRMS (FAB+) *m/z* calc'd for C<sub>14</sub>H<sub>17</sub>NOCl [M+H]<sup>+</sup>: 250.0999, found 250.0991.

### Experimental Procedures and Spectroscopic Data for the Product Transformations

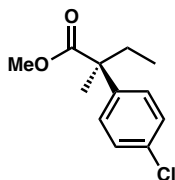

**Methyl (S)-2-(4-chlorophenyl)-2-methylbutanoate (14).** To a solution of olefin **10** (13 mg, 0.056 mmol, 1 equiv) in EtOAc (1 mL) was added Pd/C (2.5 mg, 20% w/w). The reaction mixture was sparged with a hydrogen gas (balloon) for 5 minutes and then stirred under a hydrogen atmosphere for 18 h, whereupon the reaction was filtered through celite with EtOAc (5 mL) and concentrated under reduced pressure at 0 °C to give alkyl **14** as a colorless oil (12 mg, 97% yield): [α]<sub>D</sub><sup>25</sup> +3.6 (*c* 1.2, CHCl<sub>3</sub>); <sup>1</sup>H NMR (400 MHz, CDCl<sub>3</sub>) δ 7.41 – 7.15 (m, 4H), 3.67 (s, 3H), 2.31 – 1.80 (m, 2H), 1.53 (s, 3H), 0.83 (t, *J* = 7.4 Hz, 3H); <sup>13</sup>C NMR (101 MHz, CDCl<sub>3</sub>) δ 176.5, 142.4, 132.6, 128.6, 127.7, 52.3, 50.4, 32.0, 22.2, 9.2; IR (Neat Film, NaCl) 2970, 2880, 1731, 1493, 1457, 1383, 1307, 1238, 1147, 1096, 1012, 824, 756, 720 cm<sup>-1</sup>; HRMS (FAB+) *m/z* calc'd for C<sub>12</sub>H<sub>16</sub>O<sub>2</sub>Cl [M+H]<sup>+</sup>: 227.0839, found 227.0840.

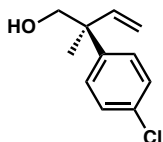

**(S)-2-(4-Chlorophenyl)-2-methylbut-3-en-1-ol (15).** DIBAL (0.029 mL, 0.16 mmol, 3 equiv) was added dropwise to a solution of methyl ester **10** (13 mg, 0.056 mmol, 1 equiv) in Et<sub>2</sub>O (1.0 mL) at 0 °C. The mixture was stirred at 0 °C for 2 h, whereupon the reaction was quenched with a saturated Rochelle's salt aqueous solution (1 mL) and stirred for 18 h at ambient temperature. The aqueous layer was then extracted with CH<sub>2</sub>Cl<sub>2</sub> (3 x 5 mL) and the combined organic layers were washed with brine (5 mL), dried over Na<sub>2</sub>SO<sub>4</sub>, and concentrated under reduced pressure at 0 °C. The crude residue was purified by preparatory TLC (25% acetone/hexanes) to give alcohol **15** as a colorless oil (8 mg, 73% yield): [ $\alpha$ ]<sub>D</sub><sup>25</sup> +11.0 (*c* 0.4, CHCl<sub>3</sub>). Characterization data match those reported in the literature.<sup>17</sup>

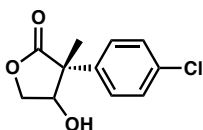

**(3S)-3-(4-Chlorophenyl)-4-hydroxy-3-methyldihydrofuran-2(3H)-one (16).** To a solution of olefin **10** (24 mg, 0.10 mmol, 1 equiv) in THF/H<sub>2</sub>O (4:1, 1 mL) was added K<sub>2</sub>OsO<sub>4</sub> (4.0 mg, 0.010 mmol, 0.1 equiv) and *N*-methylmorpholine *N*-oxide (19 mg, 0.16 mmol, 1.6 equiv). The reaction mixture was stirred for 18 h, whereupon the reaction was quenched with sodium sulfite (10 mg, 0.079 mmol, 0.79 equiv) and diluted with water (0.5 mL). The aqueous layer was then extracted with EtOAc (3 x 5 mL) and the combined organic layers were washed with brine (5 mL), dried over Na<sub>2</sub>SO<sub>4</sub>, and concentrated under reduced pressure at 0 °C. The crude residue was purified by preparatory TLC (30% acetone/hexanes) to give lactone **16** as a colorless oil (19 mg, 82% yield, 1:1 dr): [ $\alpha$ ]<sub>D</sub><sup>25</sup> – 115.6 (*c* 0.5, CHCl<sub>3</sub>); <sup>1</sup>H NMR (400 MHz, CDCl<sub>3</sub>)  $\delta$  7.43 – 7.26 (m, 4H), 4.58 (dd, *J* = 4.4, 2.8 Hz, 0.5H), 4.54 (dd, *J* = 10.2, 4.5 Hz, 0.5H), 4.35 – 4.31 (m, 0.5H), 4.28 – 4.20 (m, 1H), 4.16 (dd, *J* = 10.1, 2.8 Hz, 0.5H), 1.66 (s, 1.5H), 1.57 (s, 1.5H); <sup>13</sup>C NMR (101 MHz, CDCl<sub>3</sub>)  $\delta$  178.4, 178.1, 138.4, 134.4, 134.0, 133.9, 129.6, 129.4, 129.3, 127.8, 76.5, 76.2, 71.8, 71.6, 53.2, 52.8, 22.3, 18.5; IR (Neat Film, NaCl) 3448, 2976, 2929, 1761, 1496, 1384, 1218, 1178, 1096, 1072, 1014, 982, 927, 737, 688 cm<sup>-1</sup>; HRMS (FAB+) *m/z* calc'd for C<sub>11</sub>H<sub>12</sub>O<sub>3</sub>Cl [M+H]<sup>+</sup>: 227.0475, found 227.0481.

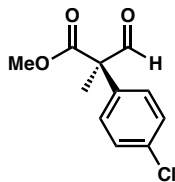

**Methyl (R)-2-(4-chlorophenyl)-2-methyl-3-oxopropanoate (17).** A solution of olefin **10** (10 mg, 0.045 mmol, 1 equiv) and NaHCO<sub>3</sub> (1.0 mg, 0.011 mmol, 0.25 equiv) in MeOH/

CH<sub>2</sub>Cl<sub>2</sub> (1:5, 2.6 mL) was cooled to -78 °C. Ozone was bubbled through the reaction mixture for 0.5 h, whereupon the reaction mixture was sparged with N<sub>2</sub> and dimethyl sulfide (0.10 mL, 0.14 mmol, 3 equiv) was added. The cooling bath was then removed and the reaction was stirred for 18 h at ambient temperature. The reaction mixture was concentrated under reduced pressure at 0 °C and the crude residue was purified by preparatory TLC (17% Et<sub>2</sub>O/hexanes) to afford aldehyde **17** as a colorless oil (5.0 mg, 50% yield): [ $\alpha$ ]<sub>D</sub><sup>25</sup> +9.1 (*c* 0.07, CHCl<sub>3</sub>); <sup>1</sup>H NMR (400 MHz, CDCl<sub>3</sub>)  $\delta$  9.83 (s, 1H), 7.41 – 7.33 (m, 2H), 7.22 – 7.13 (m, 2H), 3.81 (s, 3H), 1.69 (s, 3H); <sup>13</sup>C NMR (101 MHz, CDCl<sub>3</sub>)  $\delta$  196.2, 171.8, 134.8, 134.5, 129.5, 128.5, 61.7, 53.1, 18.0; IR (Neat Film, NaCl) 2992, 2954, 2845, 2726, 1721, 1596, 1494, 1455, 1252, 1122, 1096, 1013, 911, 823, 758, 718 cm<sup>-1</sup>; HRMS (FAB+) *m/z* calc'd for C<sub>11</sub>H<sub>12</sub>ClO<sub>3</sub> [M+H]<sup>+</sup>: 227.0475, found 227.0479.

### Crystal Structure Data for Carboxylic Acid 7h

Carboxylic acid **7h** was recrystallized by slow evaporation of CH<sub>2</sub>Cl<sub>2</sub> to provide crystals suitable for X-ray analysis.

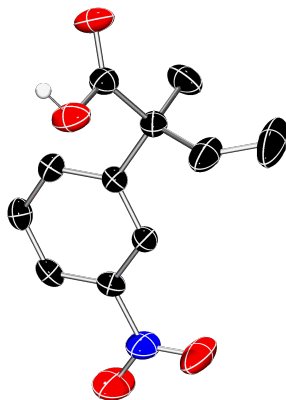

Table S2. Crystal data and structure refinement for **7h**.

|                      |                                                  |                   |
|----------------------|--------------------------------------------------|-------------------|
| Empirical formula    | C <sub>11</sub> H <sub>11</sub> N O <sub>4</sub> |                   |
| Formula weight       | 221.21                                           |                   |
| Temperature          | 200(2) K                                         |                   |
| Wavelength           | 1.54178 Å                                        |                   |
| Crystal system       | Monoclinic                                       |                   |
| Space group          | P2 <sub>1</sub>                                  |                   |
| Unit cell dimensions | a = 7.3561(3) Å                                  | a = 90°.          |
|                      | b = 6.7600(3) Å                                  | b = 94.5940(10)°. |
|                      | c = 10.9461(5) Å                                 | g = 90°.          |
| Volume               | 542.57(4) Å <sup>3</sup>                         |                   |
| Z                    | 2                                                |                   |
| Density (calculated) | 1.354 Mg/m <sup>3</sup>                          |                   |

|                                   |                                             |
|-----------------------------------|---------------------------------------------|
| Absorption coefficient            | 0.879 mm <sup>-1</sup>                      |
| F(000)                            | 232                                         |
| Theta range for data collection   | 4.051 to 72.406°.                           |
| Index ranges                      | -9<=h<=9, -8<=k<=8, -13<=l<=13              |
| Reflections collected             | 24109                                       |
| Independent reflections           | 2132 [R(int) = 0.0427]                      |
| Completeness to theta = 67.679°   | 100.0 %                                     |
| Absorption correction             | Semi-empirical from equivalents             |
| Refinement method                 | Full-matrix least-squares on F <sup>2</sup> |
| Data / restraints / parameters    | 2132 / 1 / 146                              |
| Goodness-of-fit on F <sup>2</sup> | 1.315                                       |
| Final R indices [I>2sigma(I)]     | R1 = 0.0495, wR2 = 0.1336                   |
| R indices (all data)              | R1 = 0.0497, wR2 = 0.1346                   |
| Absolute structure parameter      | 0.08(5)                                     |
| Extinction coefficient            | n/a                                         |
| Largest diff. peak and hole       | 0.312 and -0.539 e.Å <sup>-3</sup>          |

Table S3. Atomic coordinates ( $\times 10^4$ ) and equivalent isotropic displacement parameters ( $\text{\AA}^2 \times 10^3$ ) for **7h**.  $U(\text{eq})$  is defined as one third of the trace of the orthogonalized  $U^{ij}$  tensor.

|       | x        | y       | z       | U(eq) |
|-------|----------|---------|---------|-------|
| C(1)  | 6927(3)  | 5263(3) | 4602(2) | 32(1) |
| C(2)  | 7734(2)  | 5232(3) | 5795(2) | 30(1) |
| C(3)  | 6640(2)  | 5267(3) | 6762(2) | 27(1) |
| C(4)  | 4752(2)  | 5328(3) | 6510(2) | 33(1) |
| C(5)  | 3969(2)  | 5364(3) | 5309(2) | 35(1) |
| C(6)  | 5062(3)  | 5332(3) | 4329(2) | 34(1) |
| C(7)  | 7495(2)  | 5394(3) | 8089(2) | 33(1) |
| C(8)  | 7573(4)  | 7595(4) | 8448(2) | 52(1) |
| C(9)  | 9331(3)  | 4360(5) | 8210(2) | 51(1) |
| C(10) | 10884(3) | 5180(9) | 8624(2) | 86(2) |
| C(11) | 6291(2)  | 4290(3) | 8935(2) | 33(1) |
| O(1)  | 6125(2)  | 2390(3) | 8666(1) | 46(1) |
| O(2)  | 5572(2)  | 5042(3) | 9776(1) | 49(1) |
| N(1)  | 8117(3)  | 5216(4) | 3590(2) | 47(1) |
| O(3)  | 9753(2)  | 5210(6) | 3825(2) | 84(1) |
| O(4)  | 7426(3)  | 5157(6) | 2546(2) | 81(1) |



Table S4. Bond lengths [ $\text{\AA}$ ] and angles [ $^\circ$ ] for **7h**.

---

|                 |            |
|-----------------|------------|
| C(1)-C(6)       | 1.381(3)   |
| C(1)-C(2)       | 1.390(2)   |
| C(1)-N(1)       | 1.466(3)   |
| C(2)-C(3)       | 1.380(2)   |
| C(3)-C(4)       | 1.395(2)   |
| C(3)-C(7)       | 1.538(2)   |
| C(4)-C(5)       | 1.392(3)   |
| C(5)-C(6)       | 1.391(3)   |
| C(7)-C(9)       | 1.517(3)   |
| C(7)-C(11)      | 1.527(2)   |
| C(7)-C(8)       | 1.539(3)   |
| C(9)-C(10)      | 1.318(4)   |
| C(11)-O(2)      | 1.210(2)   |
| C(11)-O(1)      | 1.321(3)   |
| N(1)-O(3)       | 1.210(3)   |
| N(1)-O(4)       | 1.214(3)   |
|                 |            |
| C(6)-C(1)-C(2)  | 123.08(18) |
| C(6)-C(1)-N(1)  | 118.68(17) |
| C(2)-C(1)-N(1)  | 118.25(17) |
| C(3)-C(2)-C(1)  | 119.26(16) |
| C(2)-C(3)-C(4)  | 118.74(16) |
| C(2)-C(3)-C(7)  | 120.38(14) |
| C(4)-C(3)-C(7)  | 120.72(15) |
| C(5)-C(4)-C(3)  | 121.17(17) |
| C(6)-C(5)-C(4)  | 120.45(17) |
| C(1)-C(6)-C(5)  | 117.31(17) |
| C(9)-C(7)-C(11) | 106.08(18) |
| C(9)-C(7)-C(3)  | 110.51(16) |
| C(11)-C(7)-C(3) | 109.42(14) |
| C(9)-C(7)-C(8)  | 114.1(2)   |
| C(11)-C(7)-C(8) | 109.22(15) |
| C(3)-C(7)-C(8)  | 107.45(17) |
| C(10)-C(9)-C(7) | 125.3(4)   |

|                 |            |
|-----------------|------------|
| O(2)-C(11)-O(1) | 122.7(2)   |
| O(2)-C(11)-C(7) | 124.49(19) |
| O(1)-C(11)-C(7) | 112.85(17) |
| O(3)-N(1)-O(4)  | 122.26(19) |
| O(3)-N(1)-C(1)  | 118.91(17) |
| O(4)-N(1)-C(1)  | 118.82(19) |

Table S5. Anisotropic displacement parameters ( $\text{\AA}^2 \times 10^3$ ) for **7h**. The anisotropic displacement factor exponent takes the form:  $-2p^2 [ h^2 a^{*2} U^{11} + \dots + 2 h k a^* b^* U^{12} ]$

|       | U <sup>11</sup> | U <sup>22</sup> | U <sup>33</sup> | U <sup>23</sup> | U <sup>13</sup> | U <sup>12</sup> |
|-------|-----------------|-----------------|-----------------|-----------------|-----------------|-----------------|
| C(1)  | 38(1)           | 32(1)           | 26(1)           | -1(1)           | 2(1)            | 1(1)            |
| C(2)  | 29(1)           | 34(1)           | 28(1)           | 0(1)            | 1(1)            | 0(1)            |
| C(3)  | 30(1)           | 25(1)           | 27(1)           | 1(1)            | 1(1)            | -1(1)           |
| C(4)  | 30(1)           | 34(1)           | 35(1)           | 1(1)            | 4(1)            | 1(1)            |
| C(5)  | 29(1)           | 34(1)           | 41(1)           | 3(1)            | -5(1)           | -1(1)           |
| C(6)  | 40(1)           | 28(1)           | 32(1)           | -2(1)           | -8(1)           | 1(1)            |
| C(7)  | 31(1)           | 42(1)           | 26(1)           | 0(1)            | 3(1)            | -4(1)           |
| C(8)  | 72(2)           | 48(1)           | 36(1)           | -7(1)           | 6(1)            | -24(1)          |
| C(9)  | 33(1)           | 91(2)           | 30(1)           | 16(1)           | 4(1)            | 5(1)            |
| C(10) | 32(1)           | 176(5)          | 49(1)           | 35(2)           | -6(1)           | -14(2)          |
| C(11) | 33(1)           | 39(1)           | 26(1)           | 2(1)            | 1(1)            | 2(1)            |
| O(1)  | 62(1)           | 37(1)           | 42(1)           | 0(1)            | 22(1)           | -4(1)           |
| O(2)  | 60(1)           | 51(1)           | 38(1)           | -7(1)           | 22(1)           | 5(1)            |
| N(1)  | 50(1)           | 67(1)           | 26(1)           | 2(1)            | 4(1)            | 5(1)            |
| O(3)  | 40(1)           | 176(3)          | 36(1)           | 0(1)            | 9(1)            | 5(1)            |
| O(4)  | 66(1)           | 151(3)          | 25(1)           | -7(1)           | -1(1)           | 12(1)           |

Table S6. Hydrogen coordinates ( $\times 10^4$ ) and isotropic displacement parameters ( $\text{\AA}^2 \times 10^3$ ) for **7h**.

|        | x     | y    | z    | U(eq) |
|--------|-------|------|------|-------|
| H(2)   | 9023  | 5188 | 5942 | 36    |
| H(4)   | 3987  | 5347 | 7168 | 40    |
| H(5)   | 2680  | 5410 | 5158 | 42    |
| H(6)   | 4546  | 5355 | 3505 | 40    |
| H(8A)  | 8291  | 8322 | 7880 | 78    |
| H(8B)  | 8145  | 7730 | 9284 | 78    |
| H(8C)  | 6333  | 8135 | 8410 | 78    |
| H(9)   | 9363  | 3012 | 7967 | 62    |
| H(10A) | 10911 | 6525 | 8877 | 103   |
| H(10B) | 11978 | 4427 | 8671 | 103   |
| H(1)   | 5466  | 1842 | 9160 | 69    |

## References

<sup>1</sup> (a) Liu, W.-B.; He, H.; Dai, L.-X.; You, S.-L. *Synthesis* **2009**, 2076–2082; (b) Liu, W.-B.; Zheng, C.; Zhuo, C.-X.; Dai, L.-X.; You, S.-L. *J. Am. Chem. Soc.* **2012**, *134*, 4812–4821.

<sup>2</sup> Hamilton, J. Y.; Sarlah, D.; Carreira, E. M. *Org. Synth.* **2015**, *92*, 1–12.

<sup>3</sup> (a) Nemoto, H.; Li, X.; Ma, R.; Suzuki, I.; Shibuya, M. *Tetrahedron Lett.* **2003**, *44*, 73–75; (b) Yang, K. S.; Nibbs, A. E.; Türkmen, Y. E.; Rawal, V. H. *J. Am. Chem. Soc.* **2013**, *135*, 16050–16053.

<sup>4</sup> (a) Ardolino, M. J.; Morken, J. P. *J. Am. Chem. Soc.* **2014**, *136*, 7092–7100; (b) Evans, P. A.; Oliver, S.; Chae, J. *J. Am. Chem. Soc.* **2012**, *134*, 19314–19317.

<sup>5</sup> Matsubara, R.; Jamison, T. F. *J. Am. Chem. Soc.* **2010**, *132*, 6880–6881.

<sup>6</sup> Guzman-Martinez, A.; Hoveyda, A. H. *J. Am. Chem. Soc.* **2010**, *132*, 10634–10637.

<sup>7</sup> Ruan, J.; Li, X.; Saidi, O.; Xiao, J. *J. Am. Chem. Soc.* **2008**, *130*, 2424–2425.

- 
- <sup>8</sup> Duan, Z.-C.; Hu, X.-P.; Zhang, C.; Zheng, Z. *J. Org. Chem.* **2010**, *75*, 8319–8321.
- <sup>9</sup> Nakatsuji, H.; Ueno, K.; Misaki, T.; Tanabe, Y. *Org. Lett.* **2008**, *10*, 2131–2134.
- <sup>10</sup> Gürtler, C.; Buchwald, S. L. *Chem. Eur. J.* **1999**, *5*, 3107–3112.
- <sup>11</sup> Sano, S.; Yokoyama, K.; Shiro, M.; Nagao, Y. *Chem. Pharm. Bull.* **2002**, *50*, 706–709.
- <sup>12</sup> Ho Oh, C.; Jung, H. H.; Kim, K. S.; Kim, N. *Angew. Chem. Int. Ed.* **2003**, *42*, 805–808.
- <sup>13</sup> Bernasconi, M.; Ramella, V.; Tosatti, P.; Pfaltz, A. *Chem. Eur. J.* **2014**, *20*, 2440–2444.
- <sup>14</sup> Bensel, N.; Höhn, J.; Marschall, H.; Weyerstahl, P. *Eur. J. Inorg. Chem.* **1979**, *112*, 2256–2277.
- <sup>15</sup> Takaya, J.; Iwasawa, N. *J. Am. Chem. Soc.* **2008**, *130*, 15254–15255.
- <sup>16</sup> Duong, H. A.; Huleatt, P. B.; Tan, Q.-W.; Shuying, E. L. *Org. Lett.* **2013**, *15*, 4034–4037.
- <sup>17</sup> Ngai, M.-Y.; Skucas, E.; Krische, M. J. *Org. Lett.* **2008**, *10*, 2705–2708.

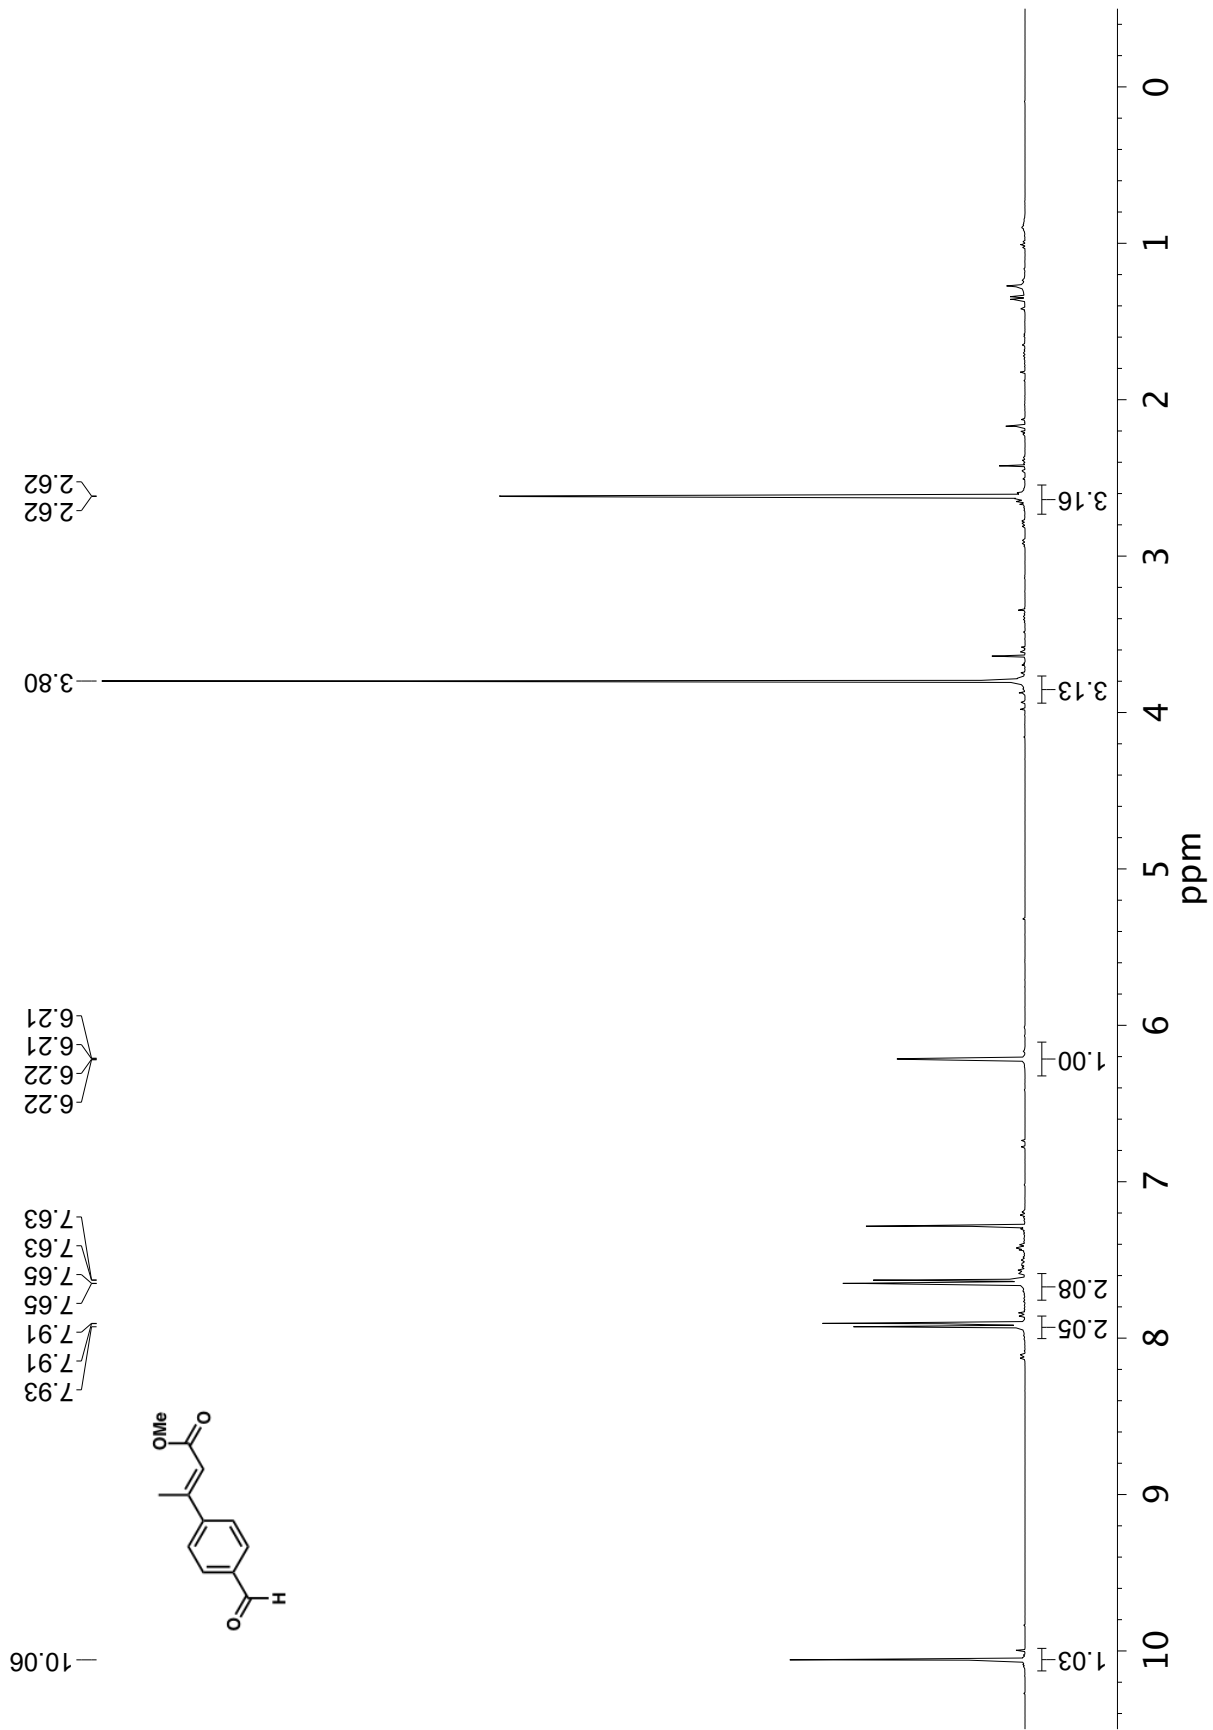

<sup>1</sup>H NMR (400 MHz, CDCl<sub>3</sub>) of compound SI-1.

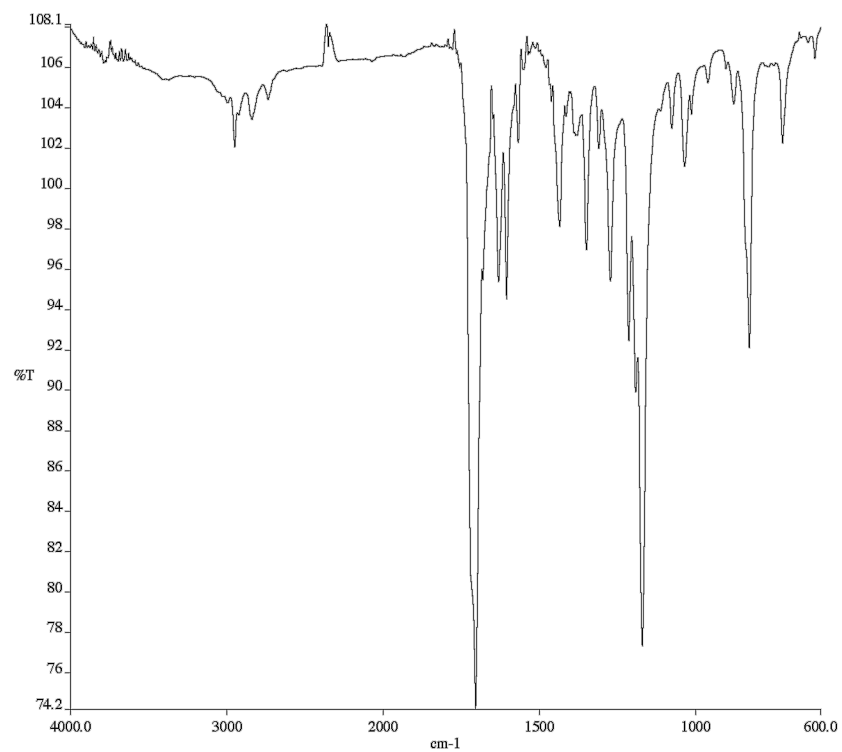

Infrared spectrum (Thin Film, NaCl) of compound **S1-1**.

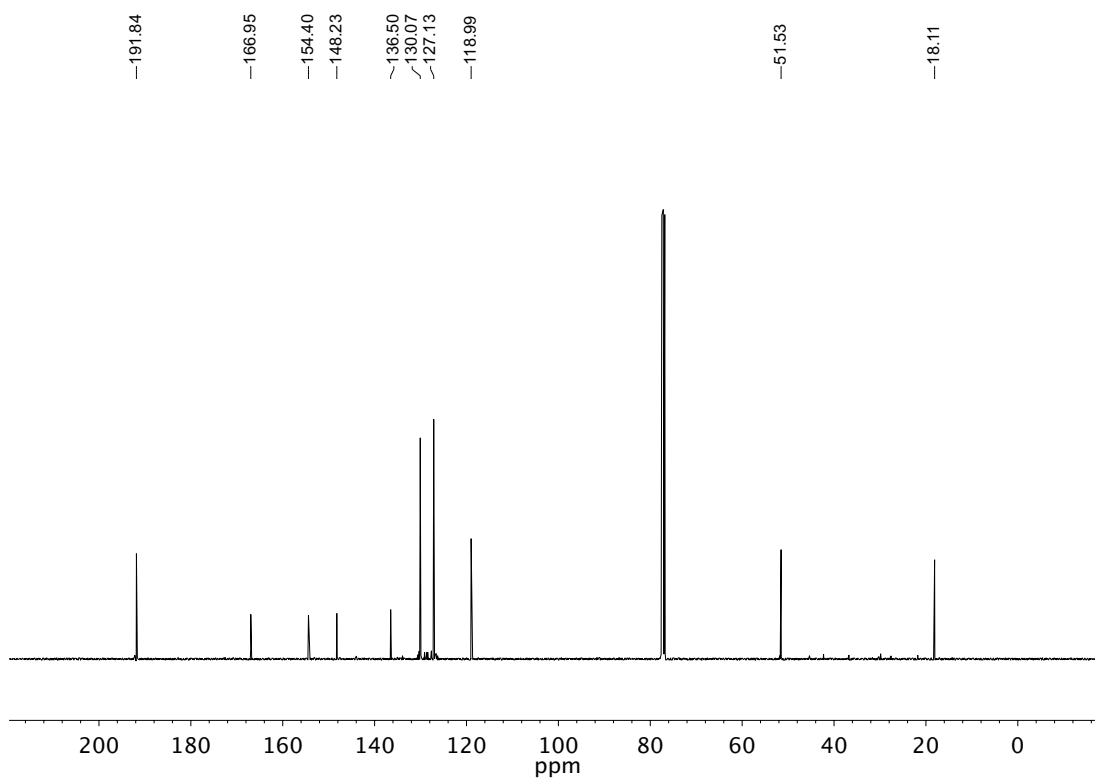

<sup>13</sup>C NMR (101 MHz, CDCl<sub>3</sub>) of compound **S1-1**.

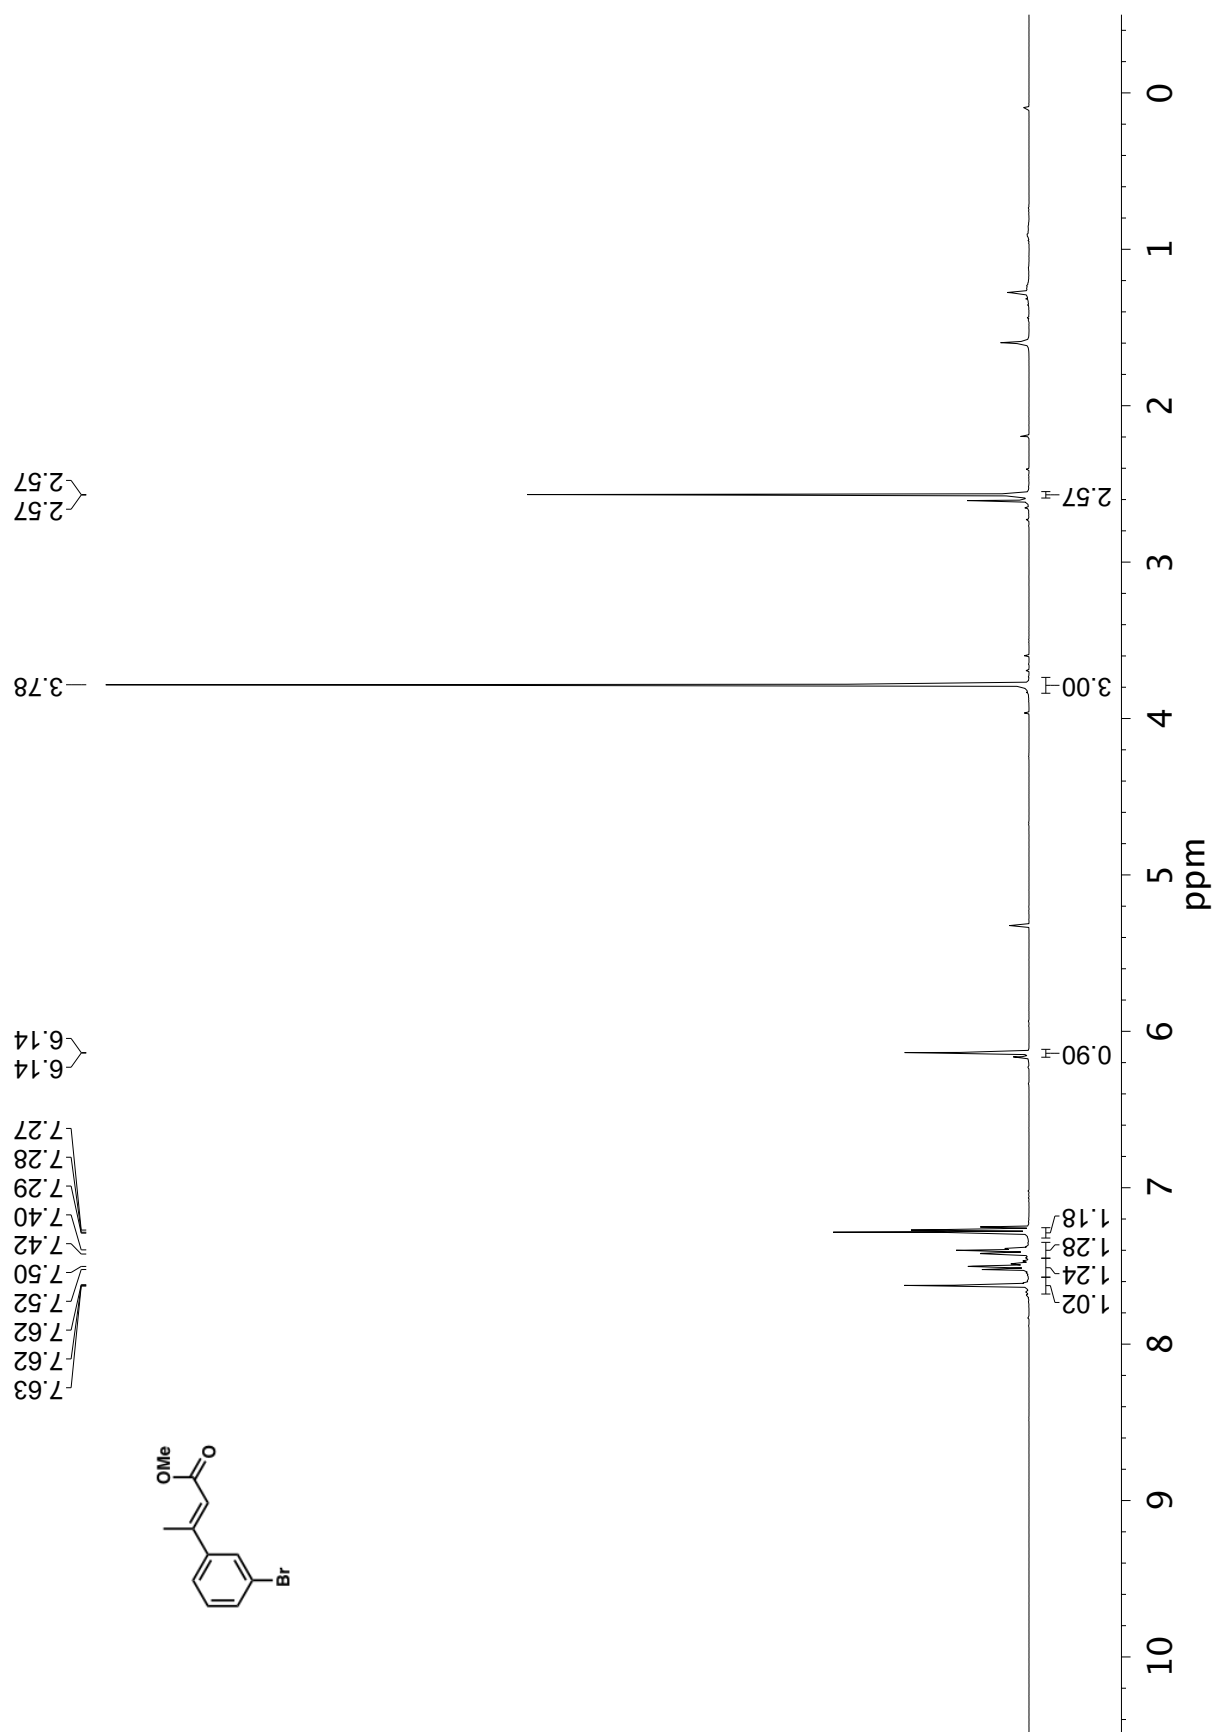

<sup>1</sup>H NMR (400 MHz, CDCl<sub>3</sub>) of compound SI-2.

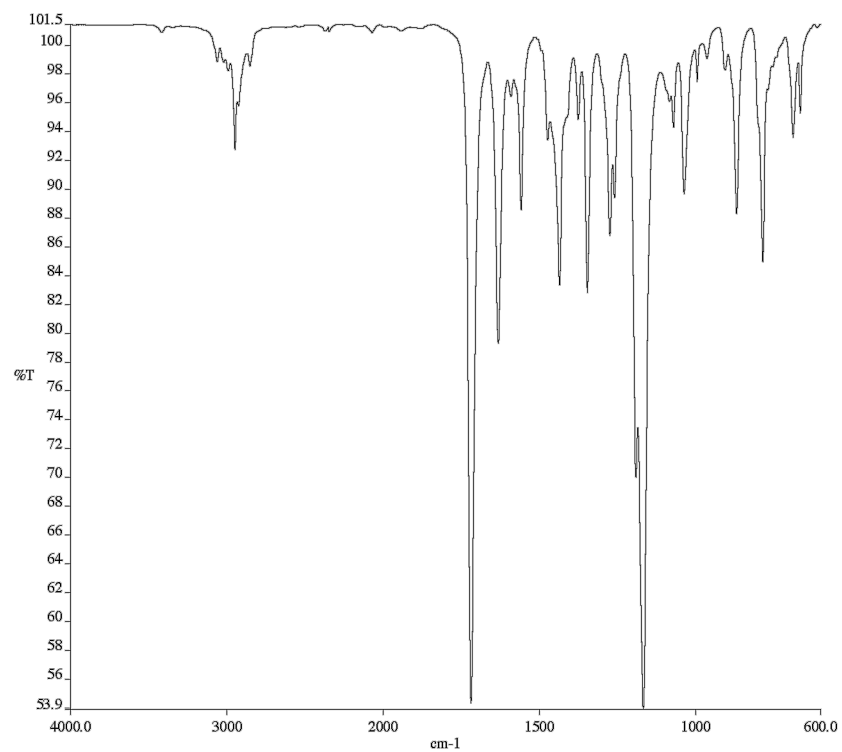

Infrared spectrum (Thin Film, NaCl) of compound **SI-2**.

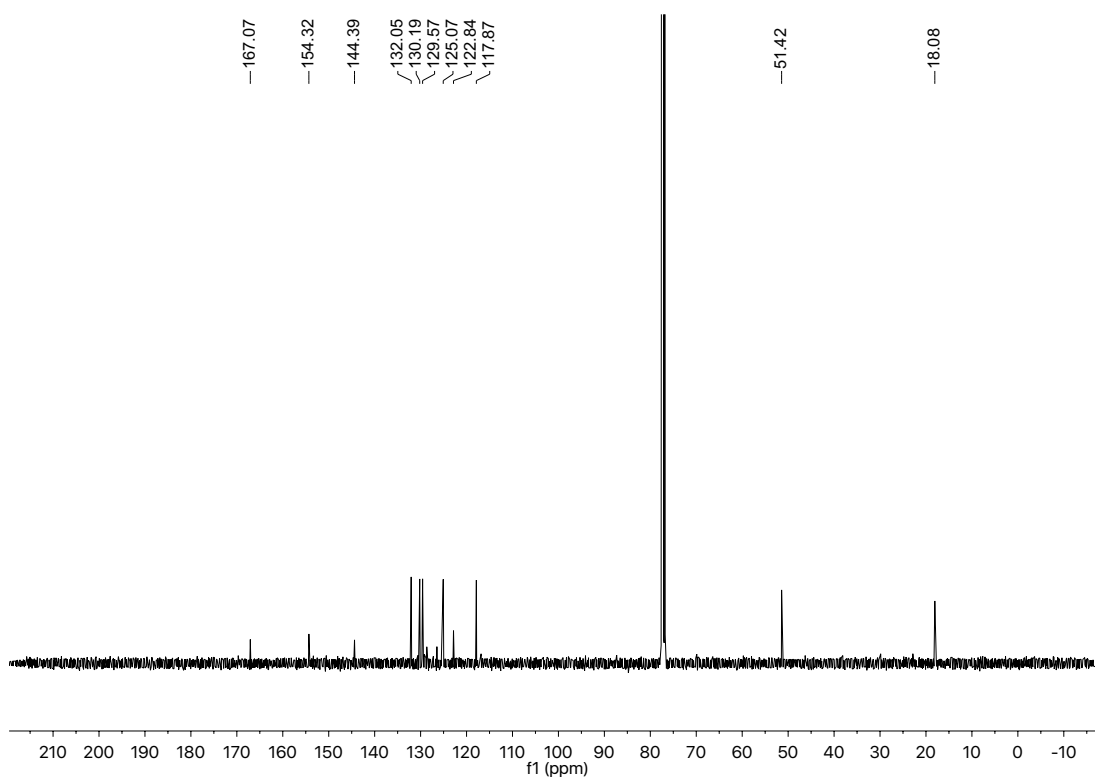

<sup>13</sup>C NMR (101 MHz, CDCl<sub>3</sub>) of compound **S1-2**.



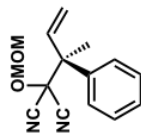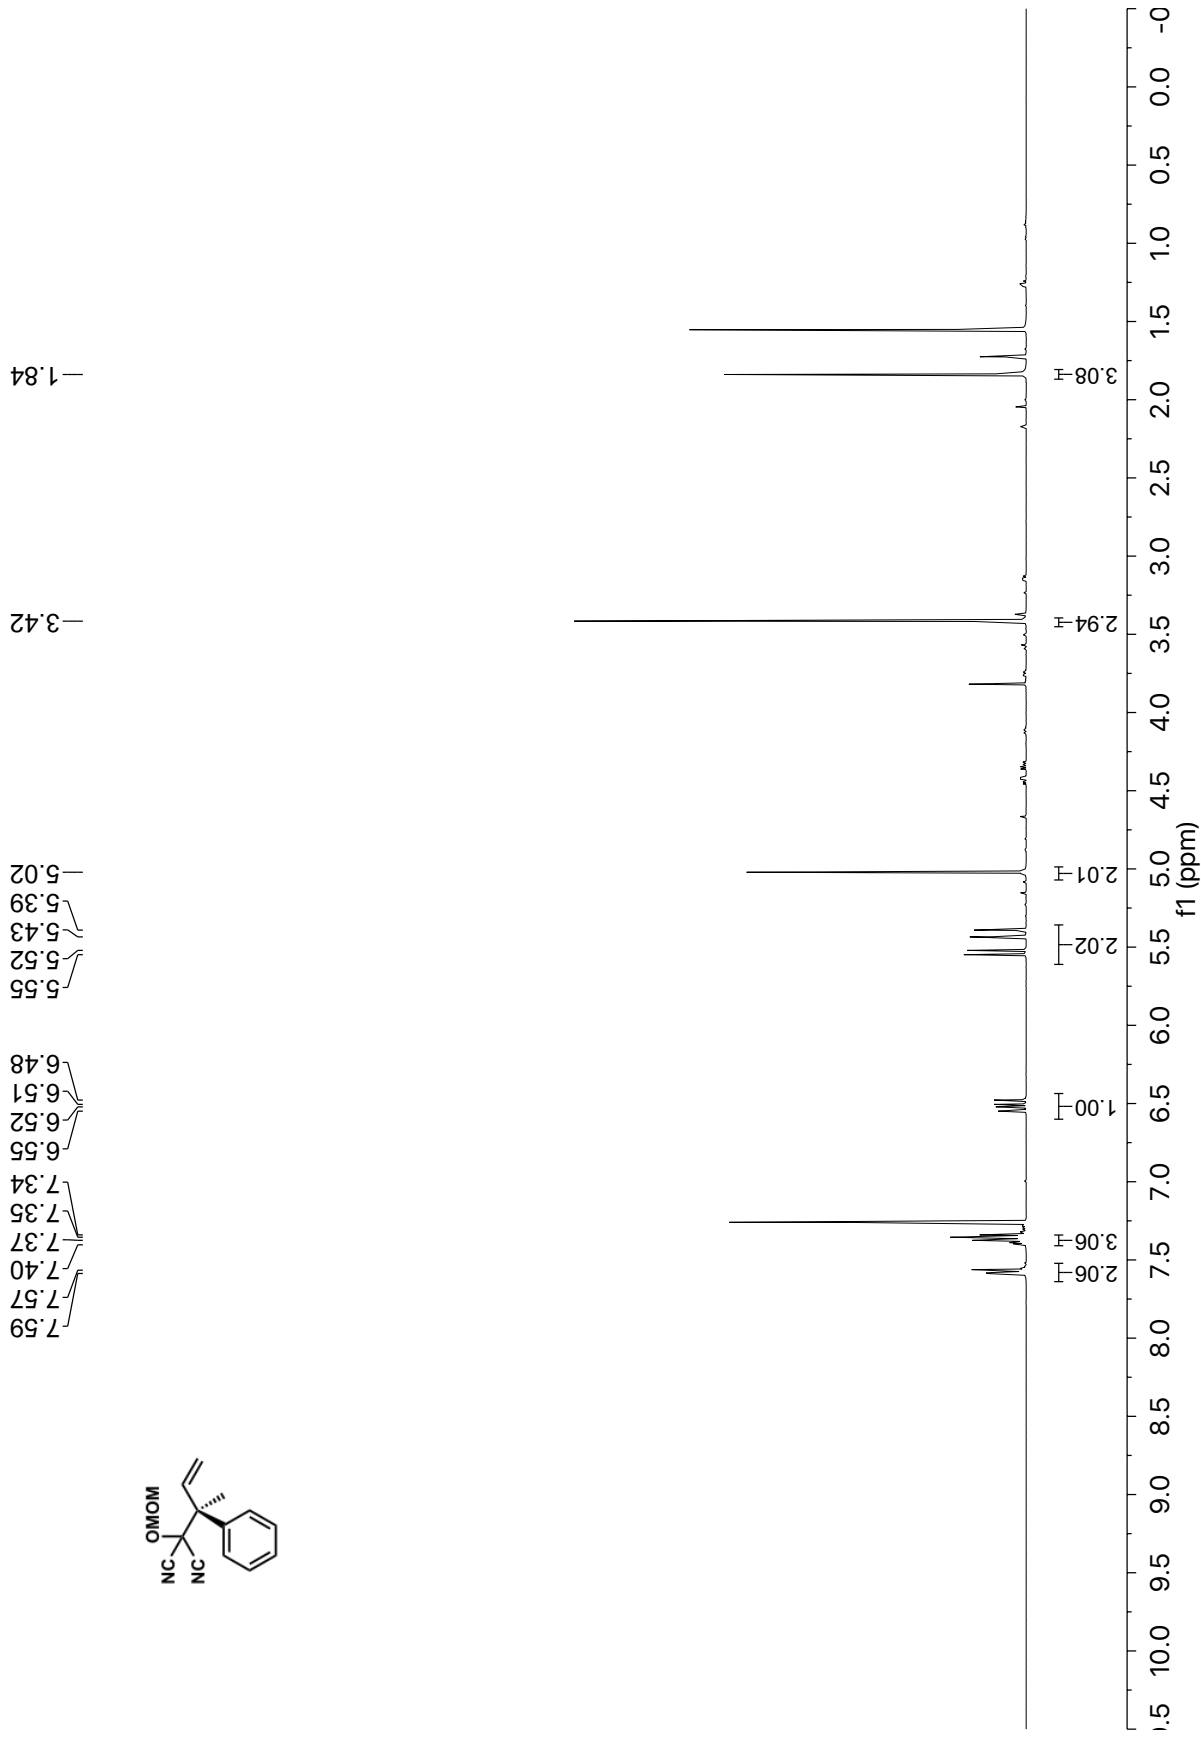

<sup>1</sup>H NMR (400 MHz, CDCl<sub>3</sub>) of compound **3**.

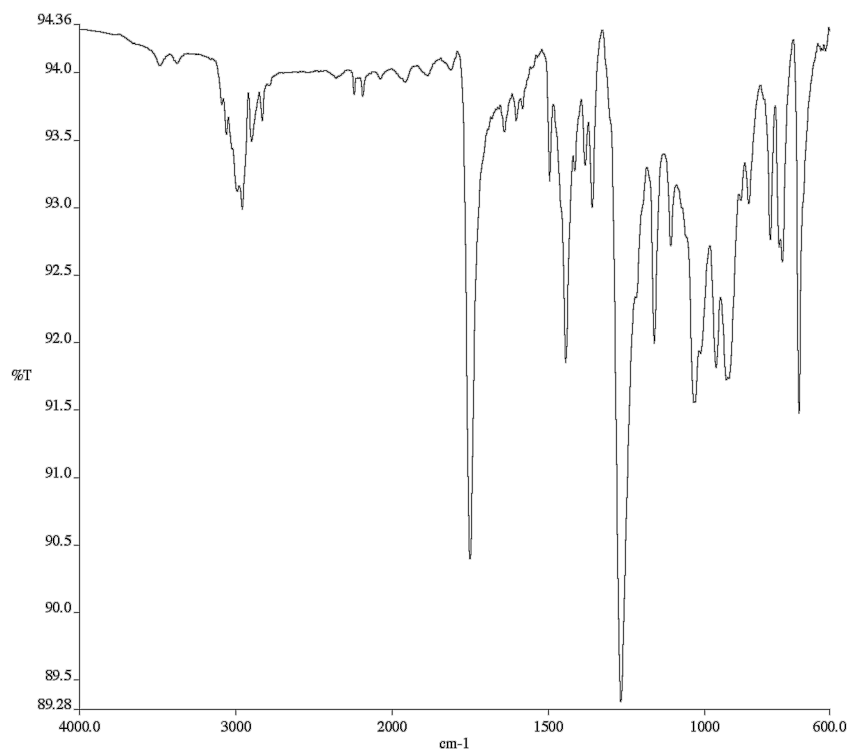

Infrared spectrum (Thin Film, NaCl) of compound **3**.

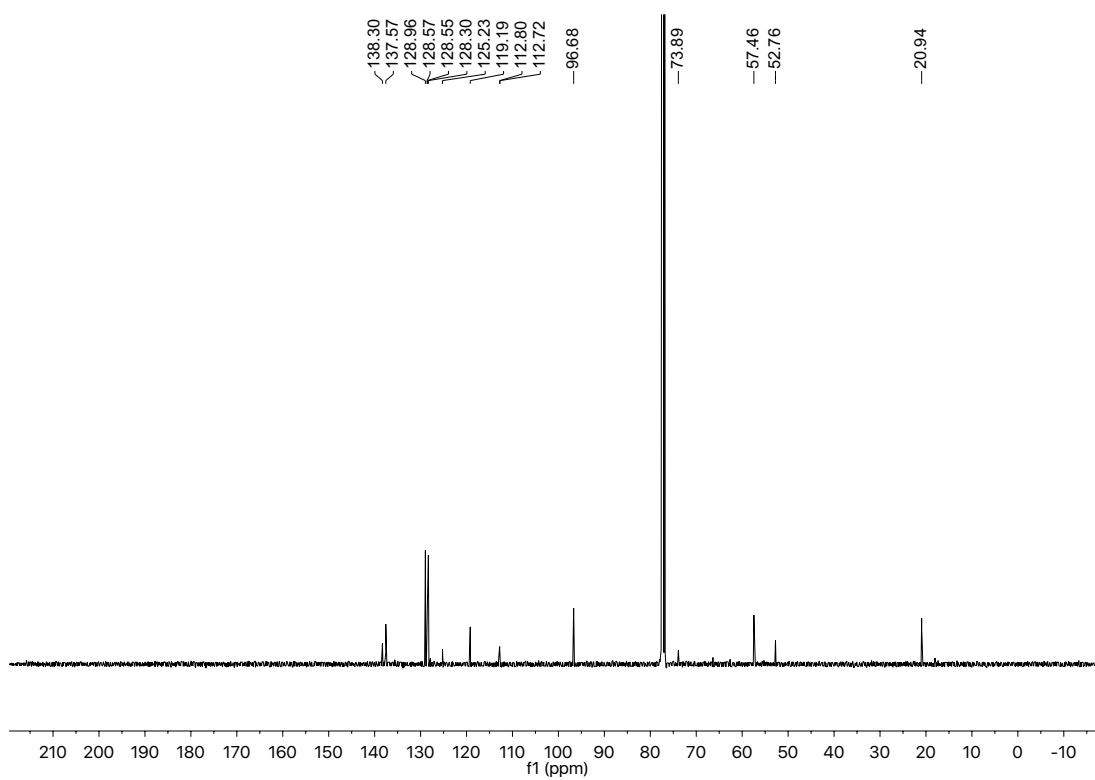

<sup>13</sup>C NMR (101 MHz, CDCl<sub>3</sub>) of compound **3**.

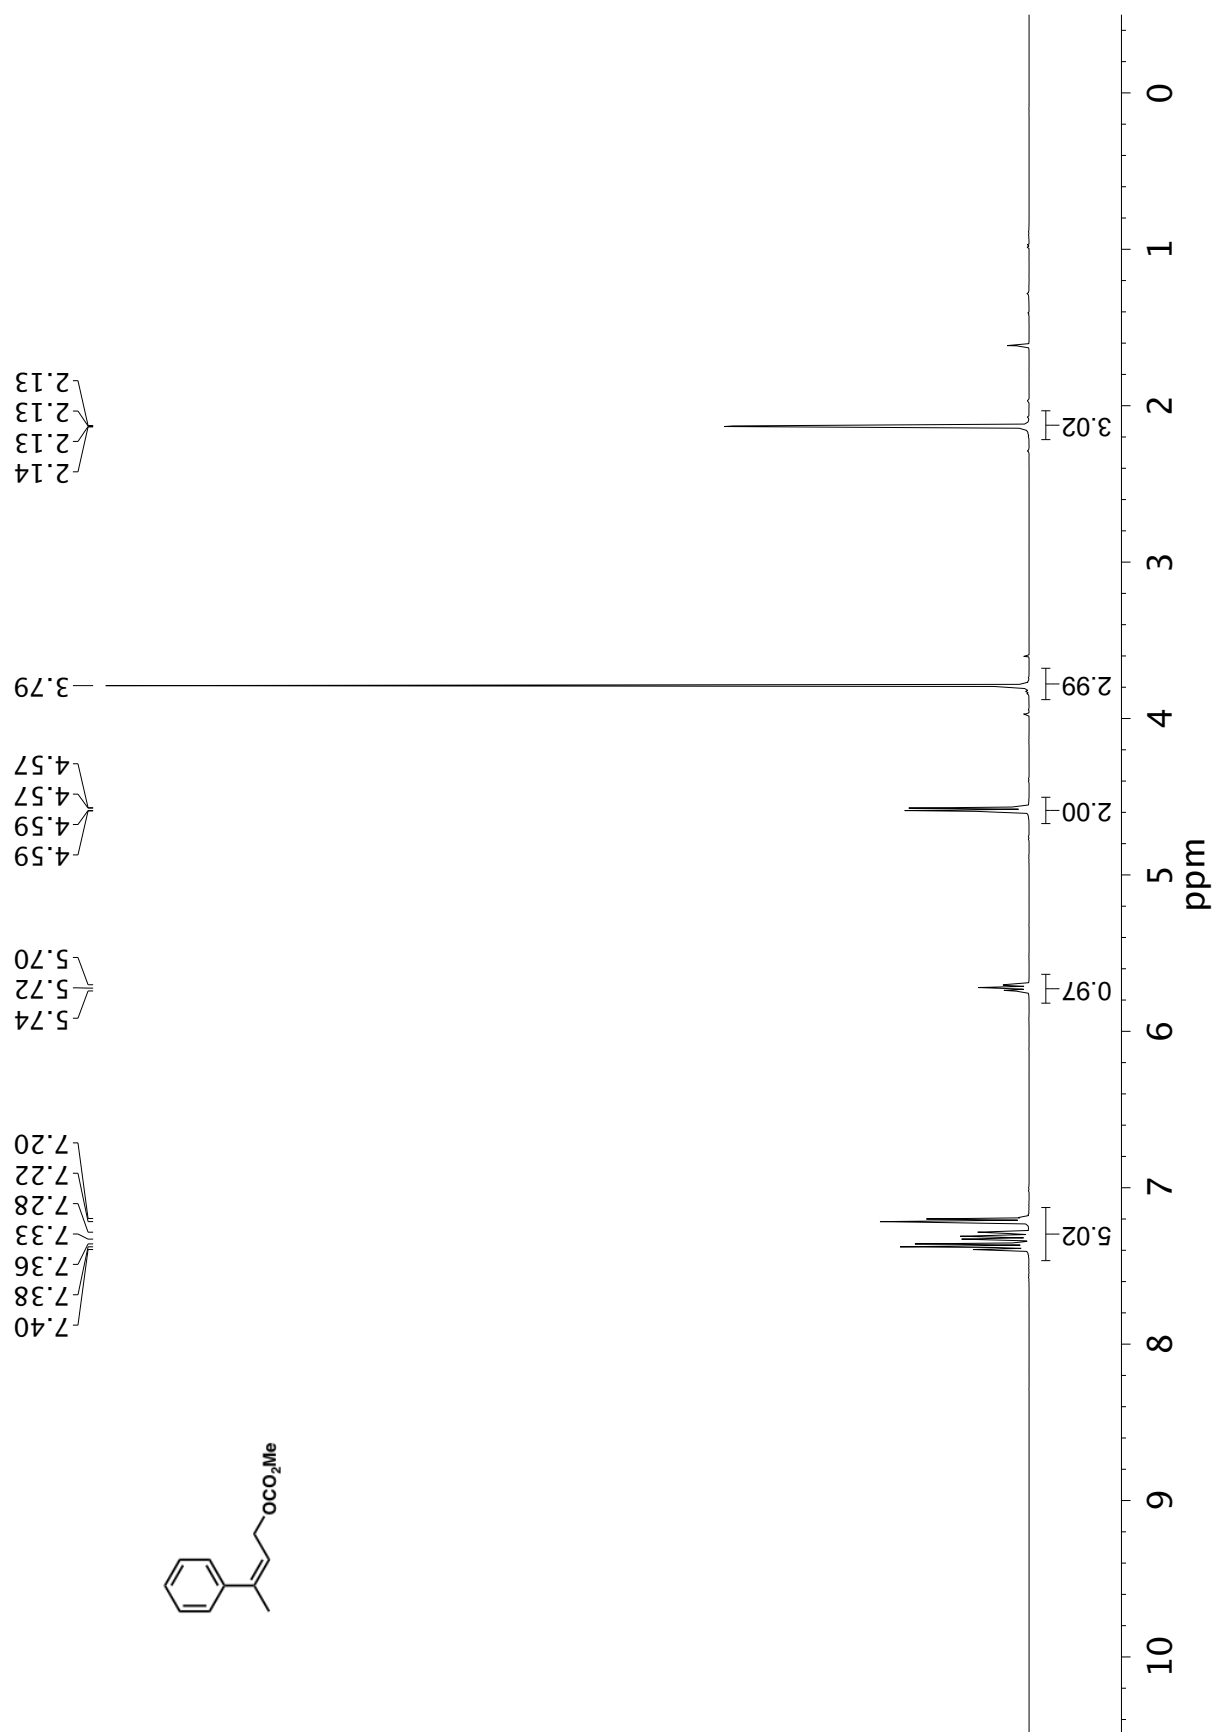

<sup>1</sup>H NMR (400 MHz, CDCl<sub>3</sub>) of compound 4.

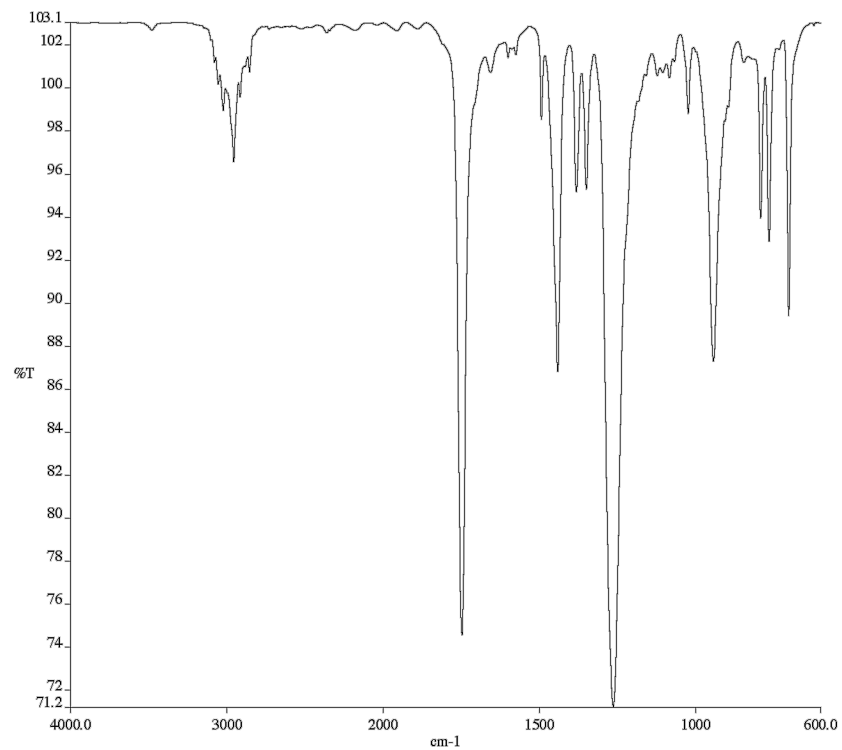

Infrared spectrum (Thin Film, NaCl) of compound **4**.

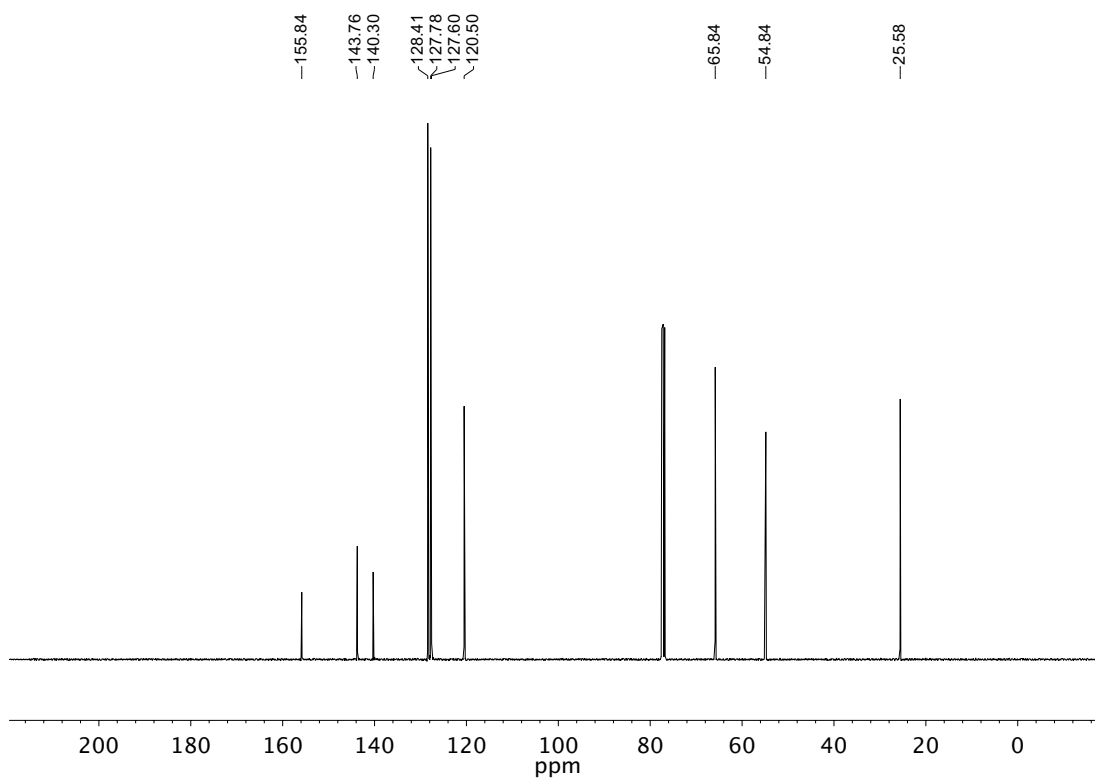

<sup>13</sup>C NMR (101 MHz, CDCl<sub>3</sub>) of compound **4**.

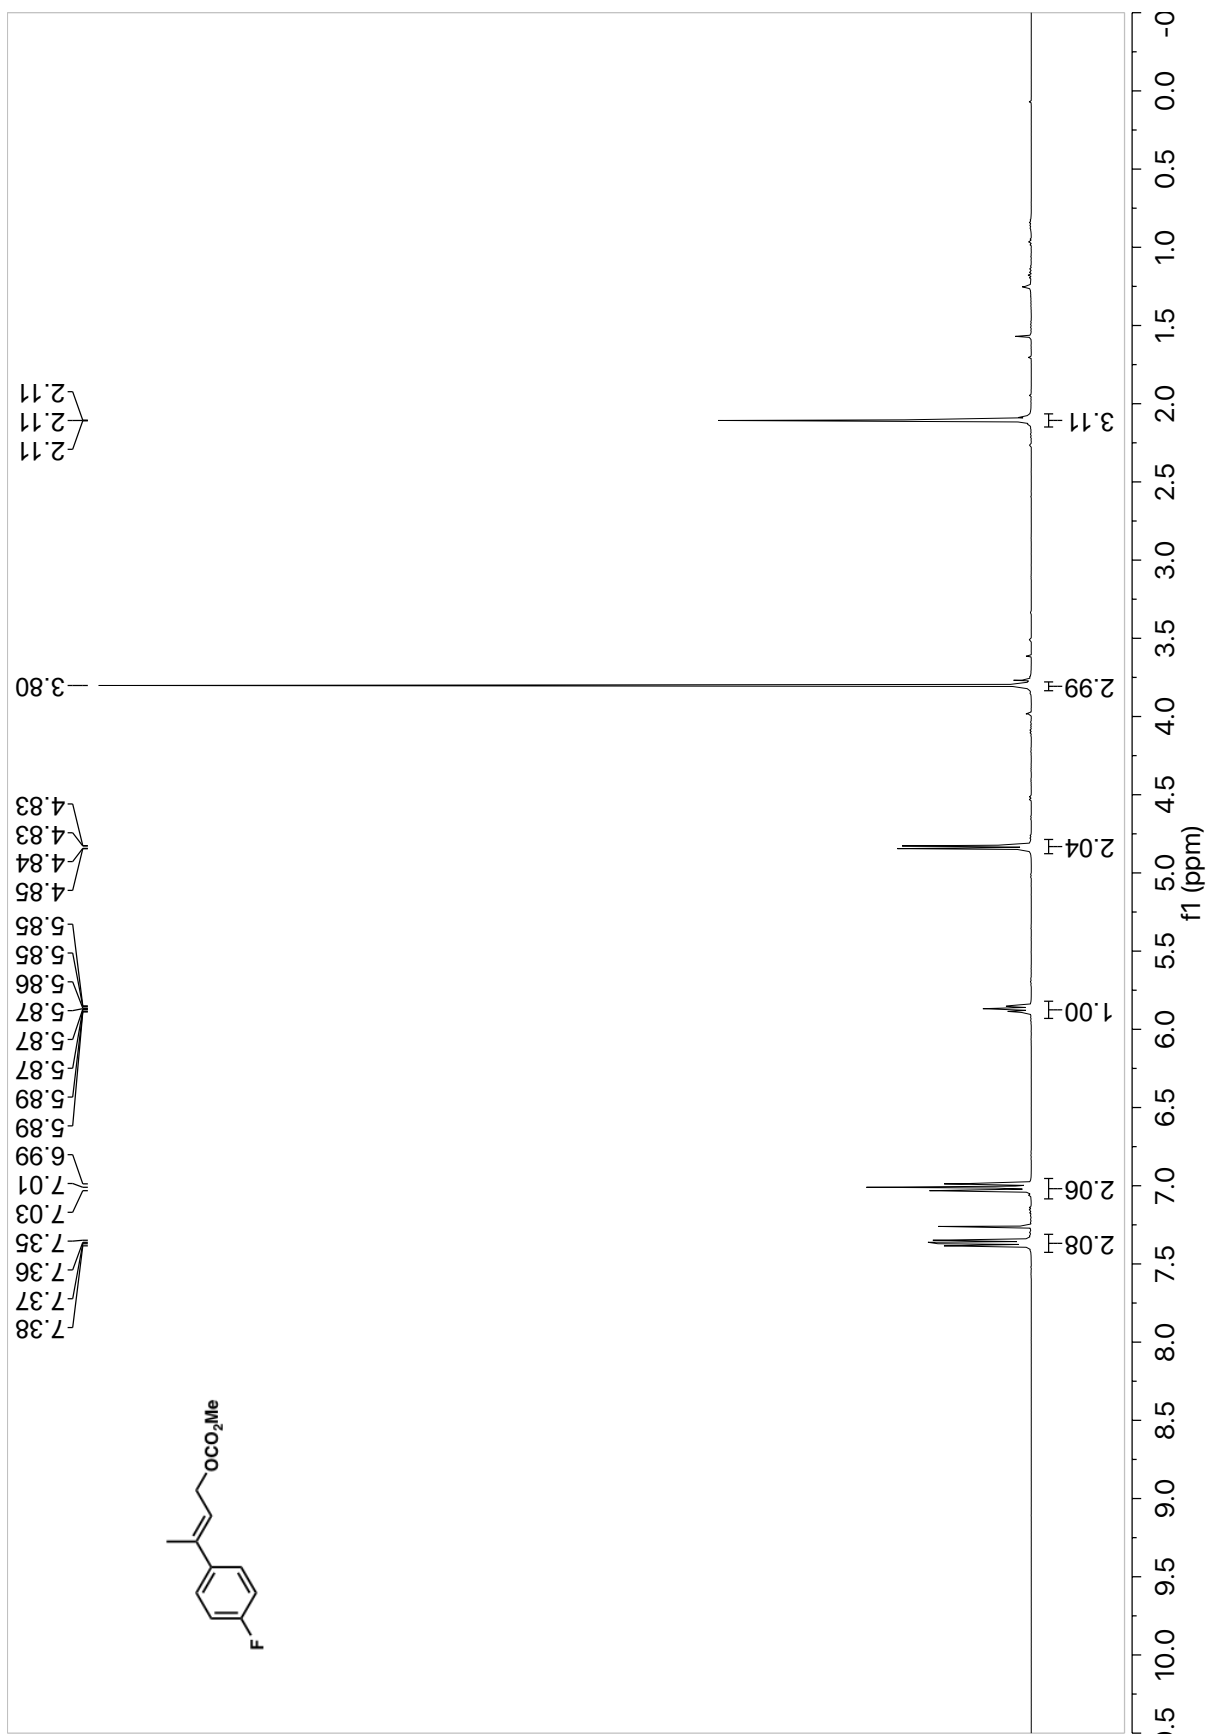

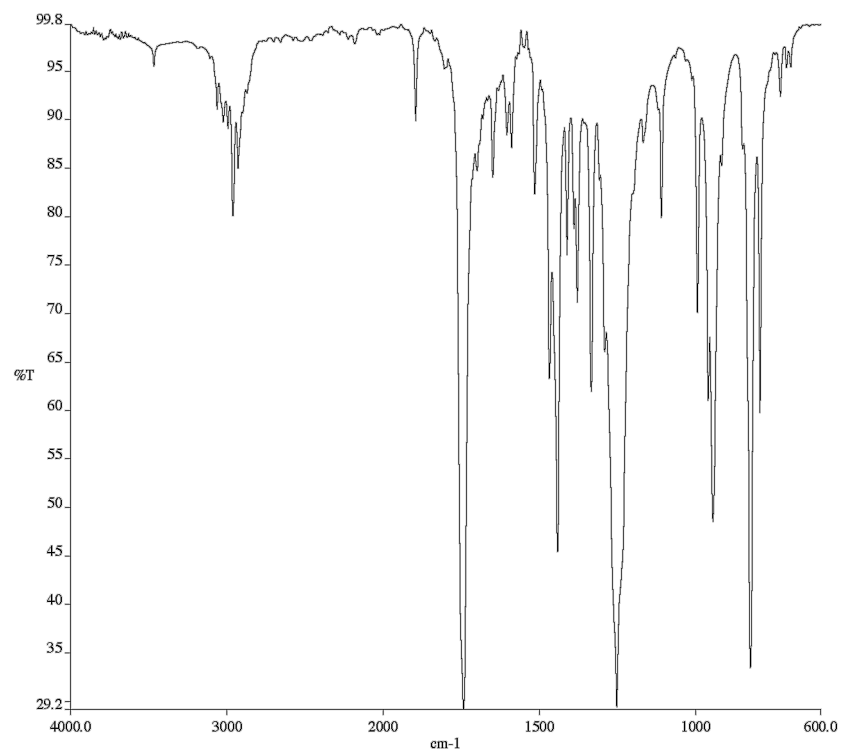

Infrared spectrum (Thin Film, NaCl) of compound **6c**.

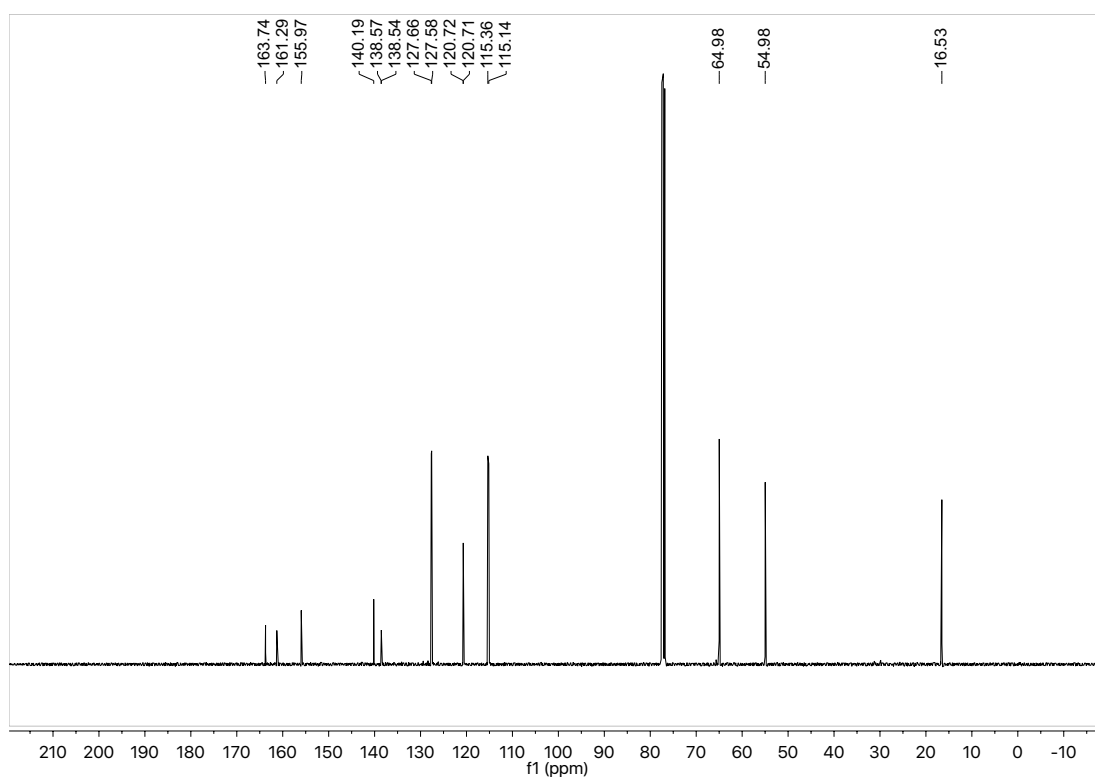

<sup>13</sup>C NMR (101 MHz, CDCl<sub>3</sub>) of compound **6c**.

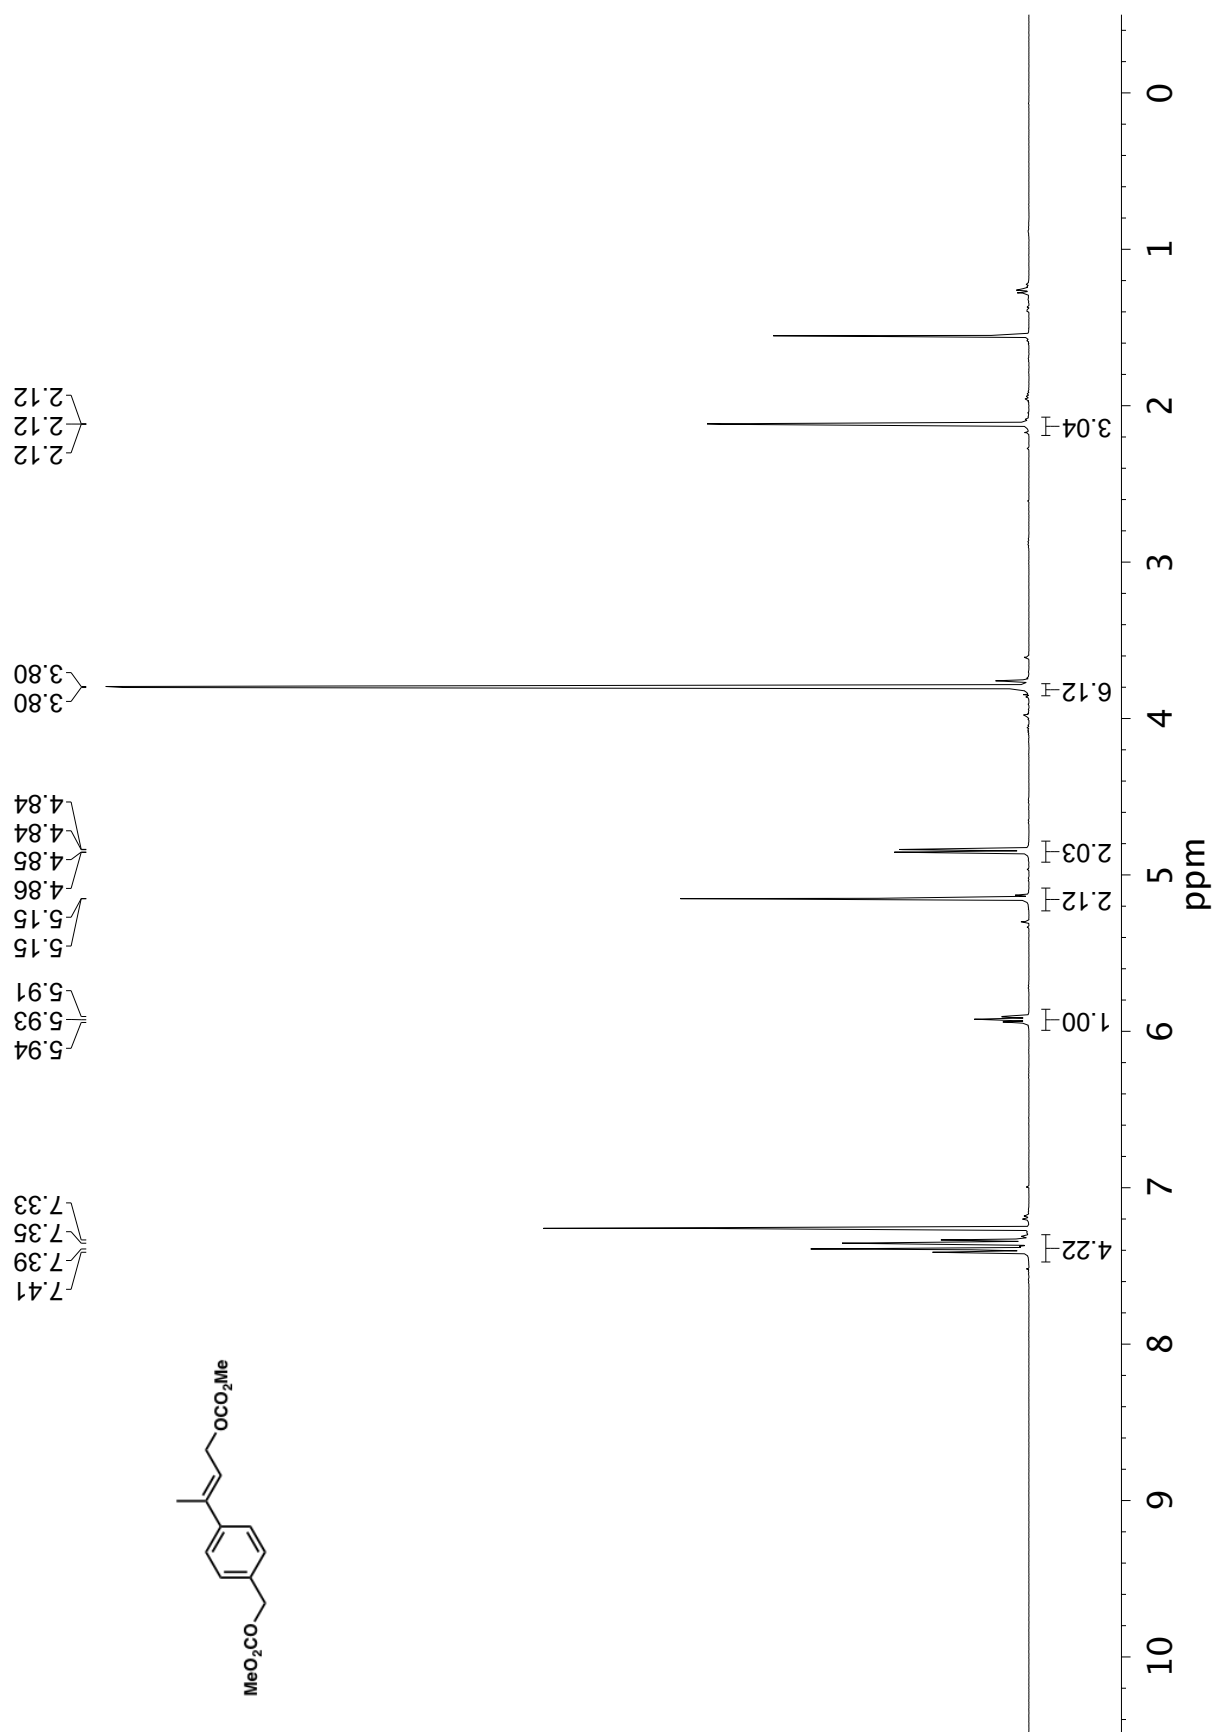

<sup>1</sup>H NMR (400 MHz, CDCl<sub>3</sub>) of compound 6f.

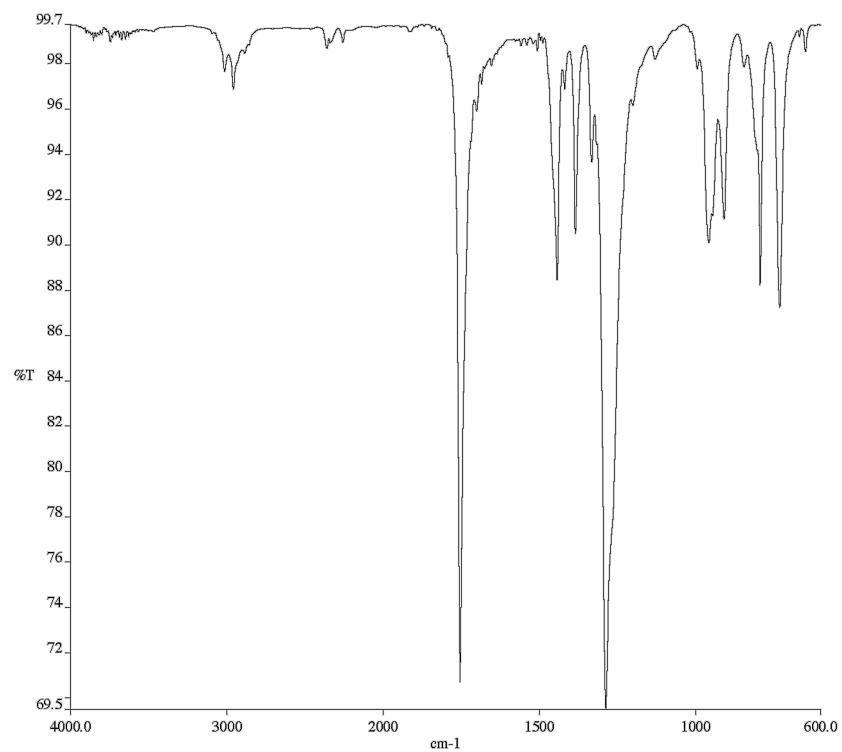

Infrared spectrum (Thin Film, NaCl) of compound **6f**.

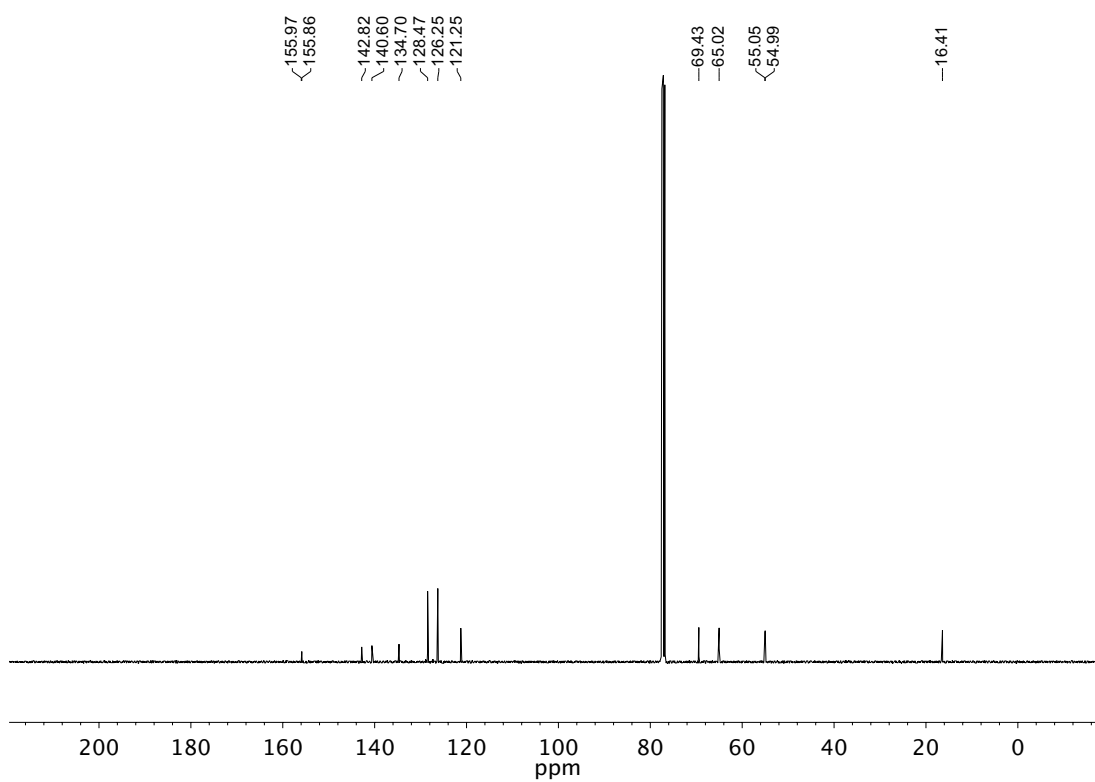

<sup>13</sup>C NMR (101 MHz, CDCl<sub>3</sub>) of compound **6f**.



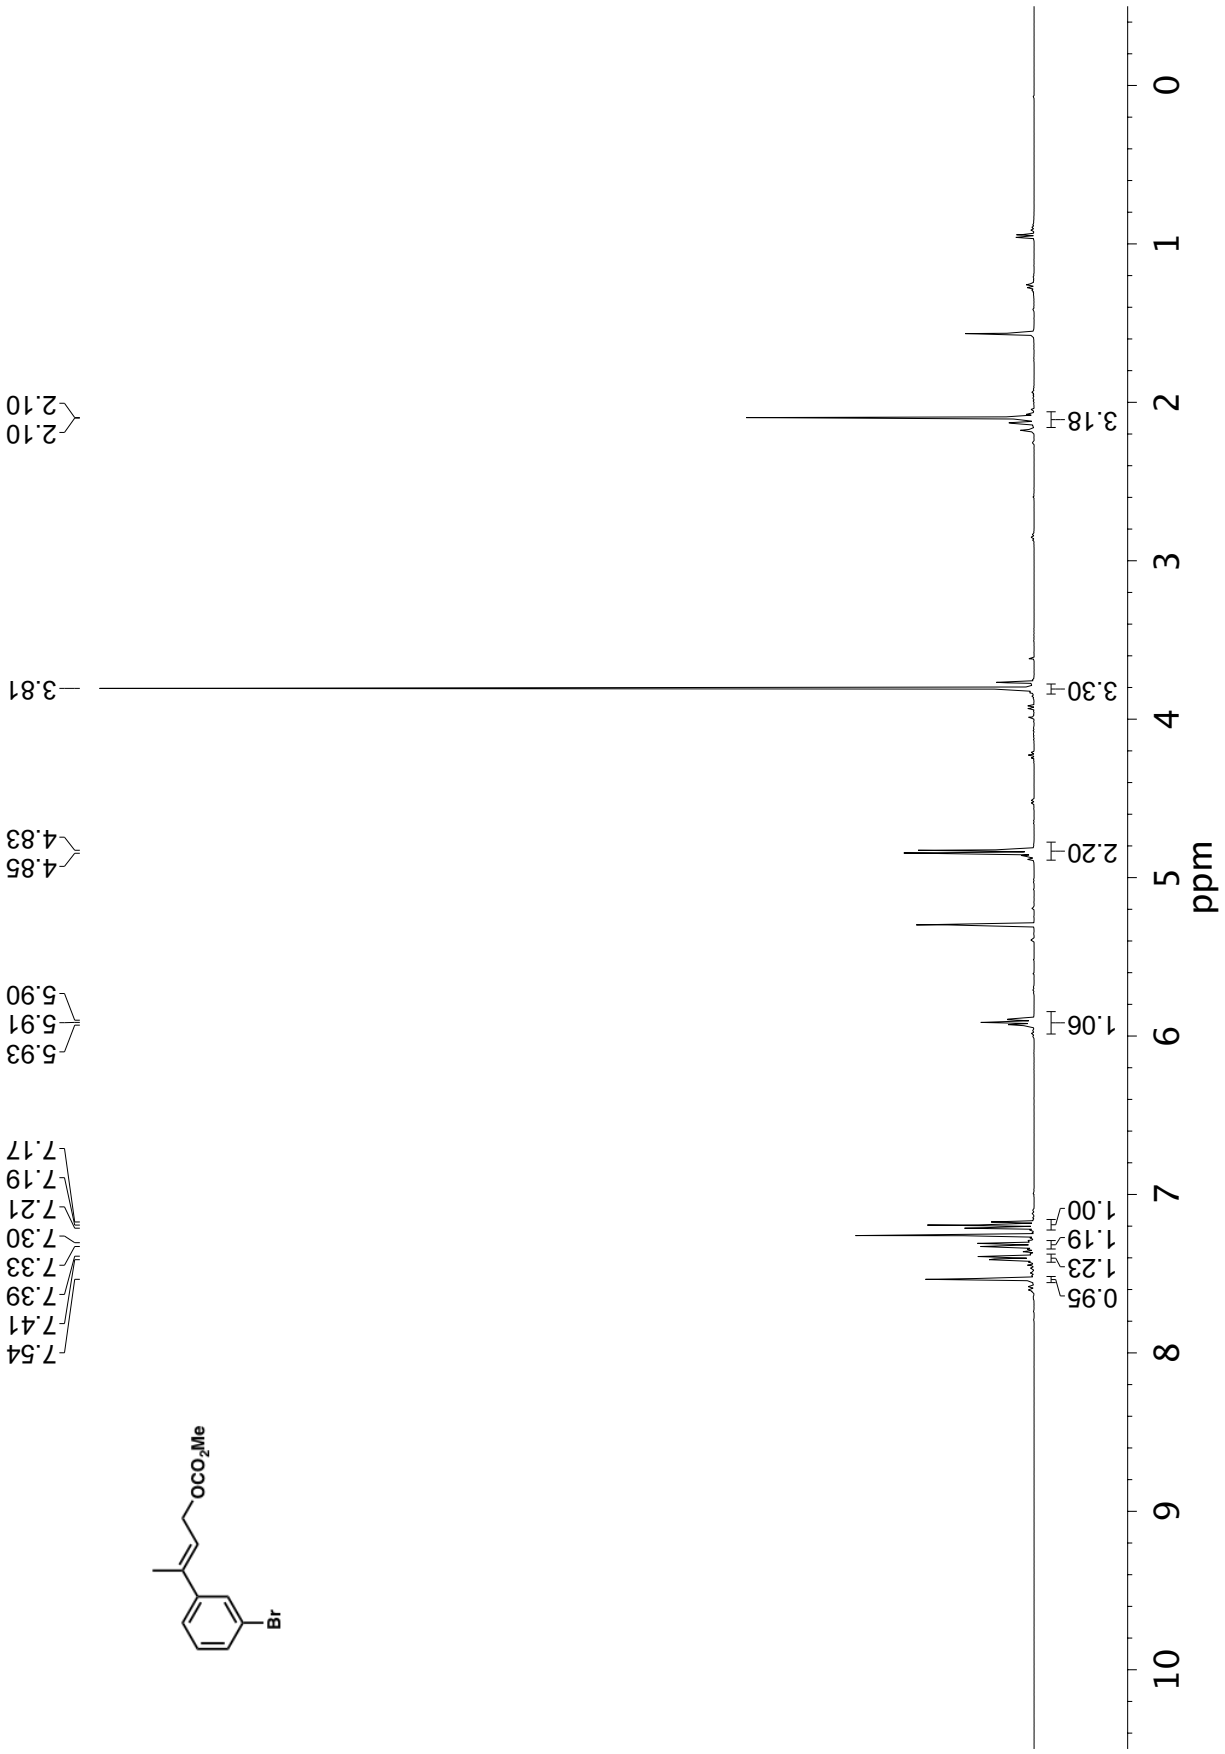

<sup>1</sup>H NMR (400 MHz, CDCl<sub>3</sub>) of compound 6g.

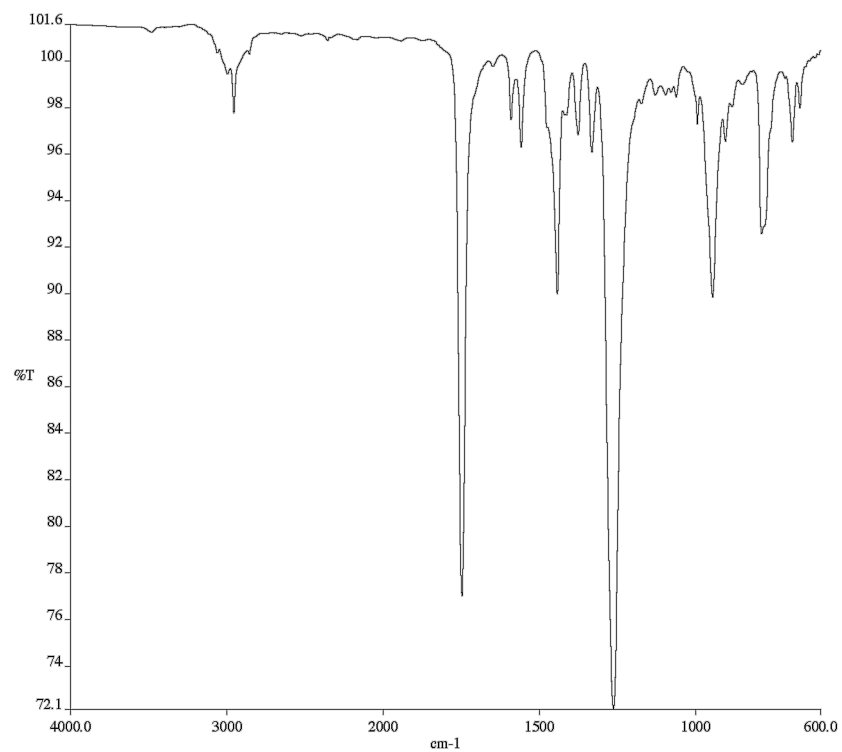

Infrared spectrum (Thin Film, NaCl) of compound **6g**.

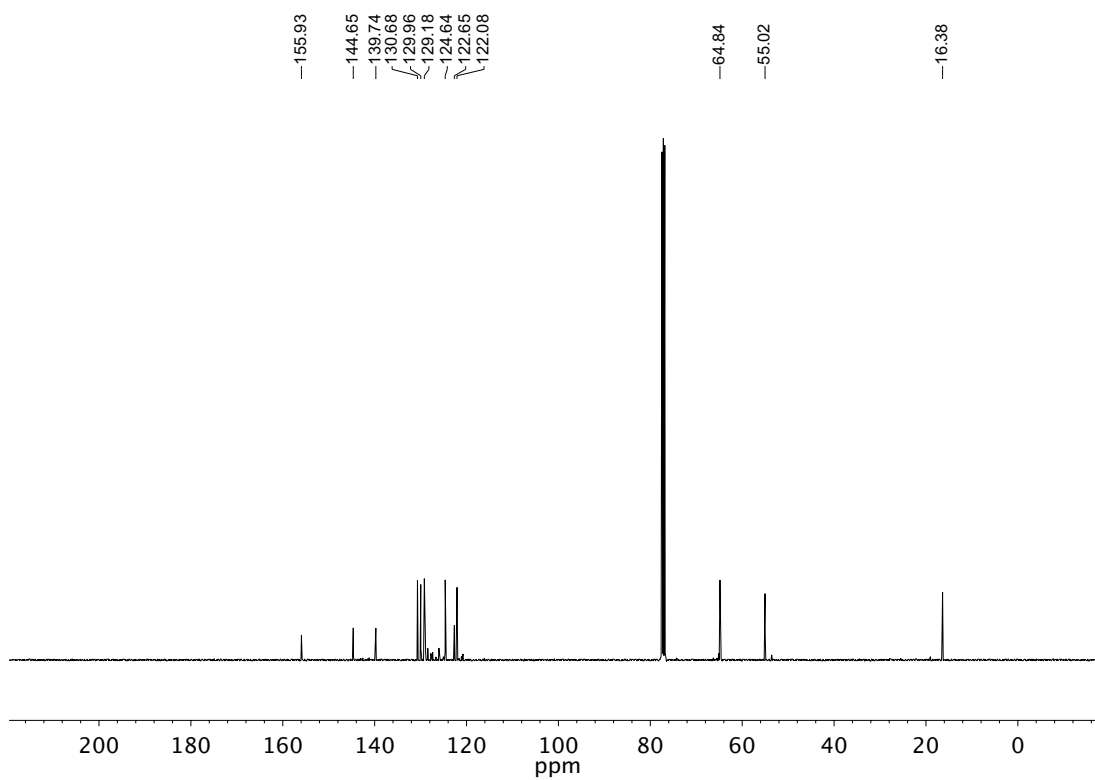

<sup>13</sup>C NMR (101 MHz, CDCl<sub>3</sub>) of compound **6g**.

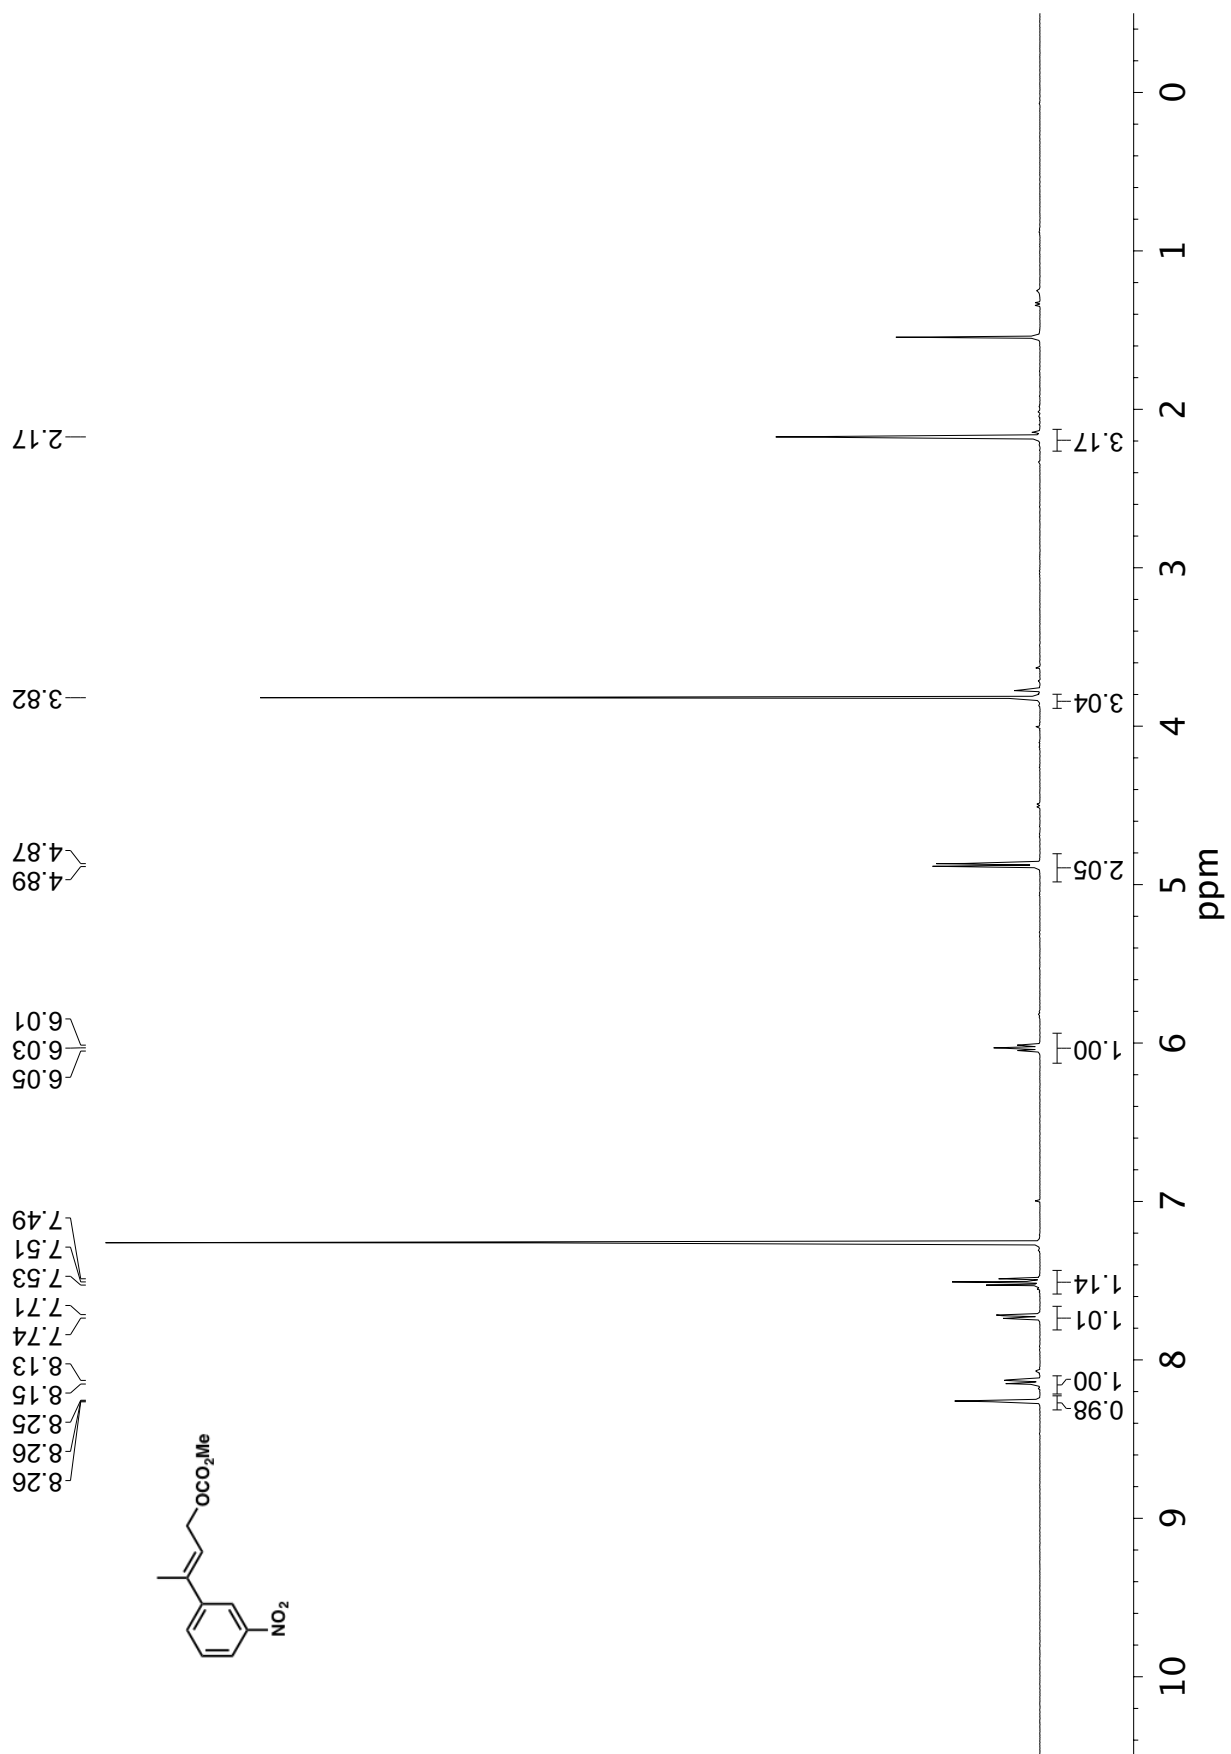

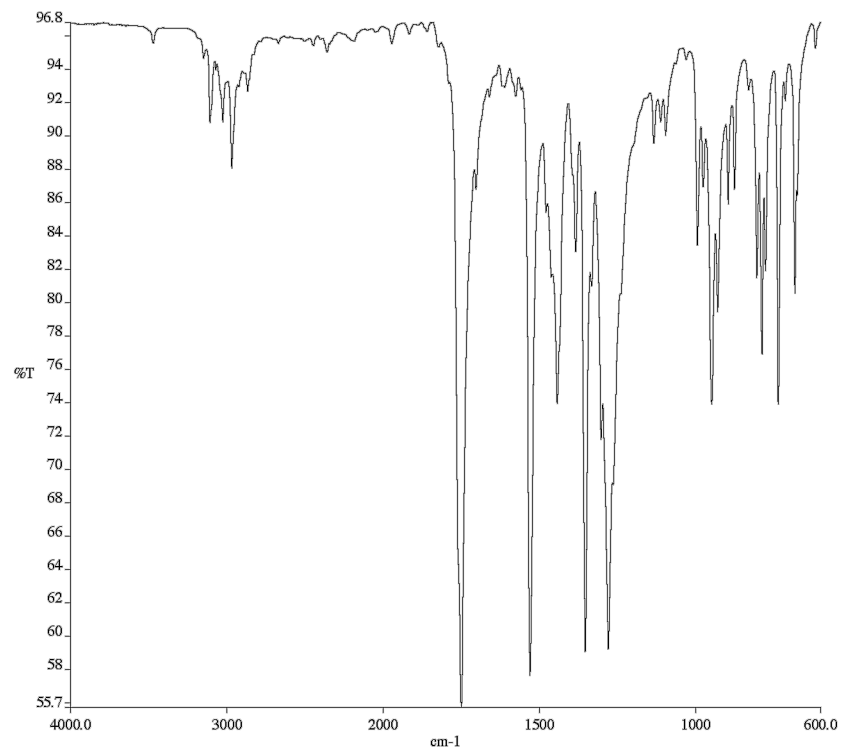

Infrared spectrum (Thin Film, NaCl) of compound **6h**.

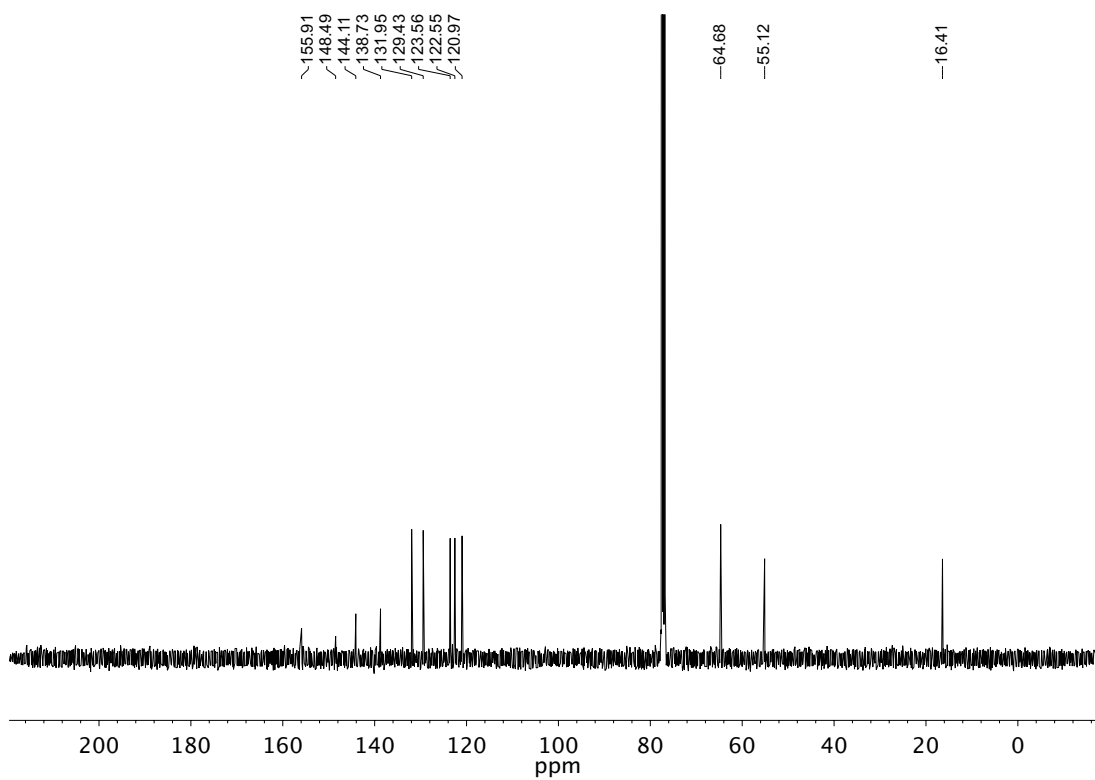

$^{13}\text{C}$  NMR (101 MHz,  $\text{CDCl}_3$ ) of compound **6h**.

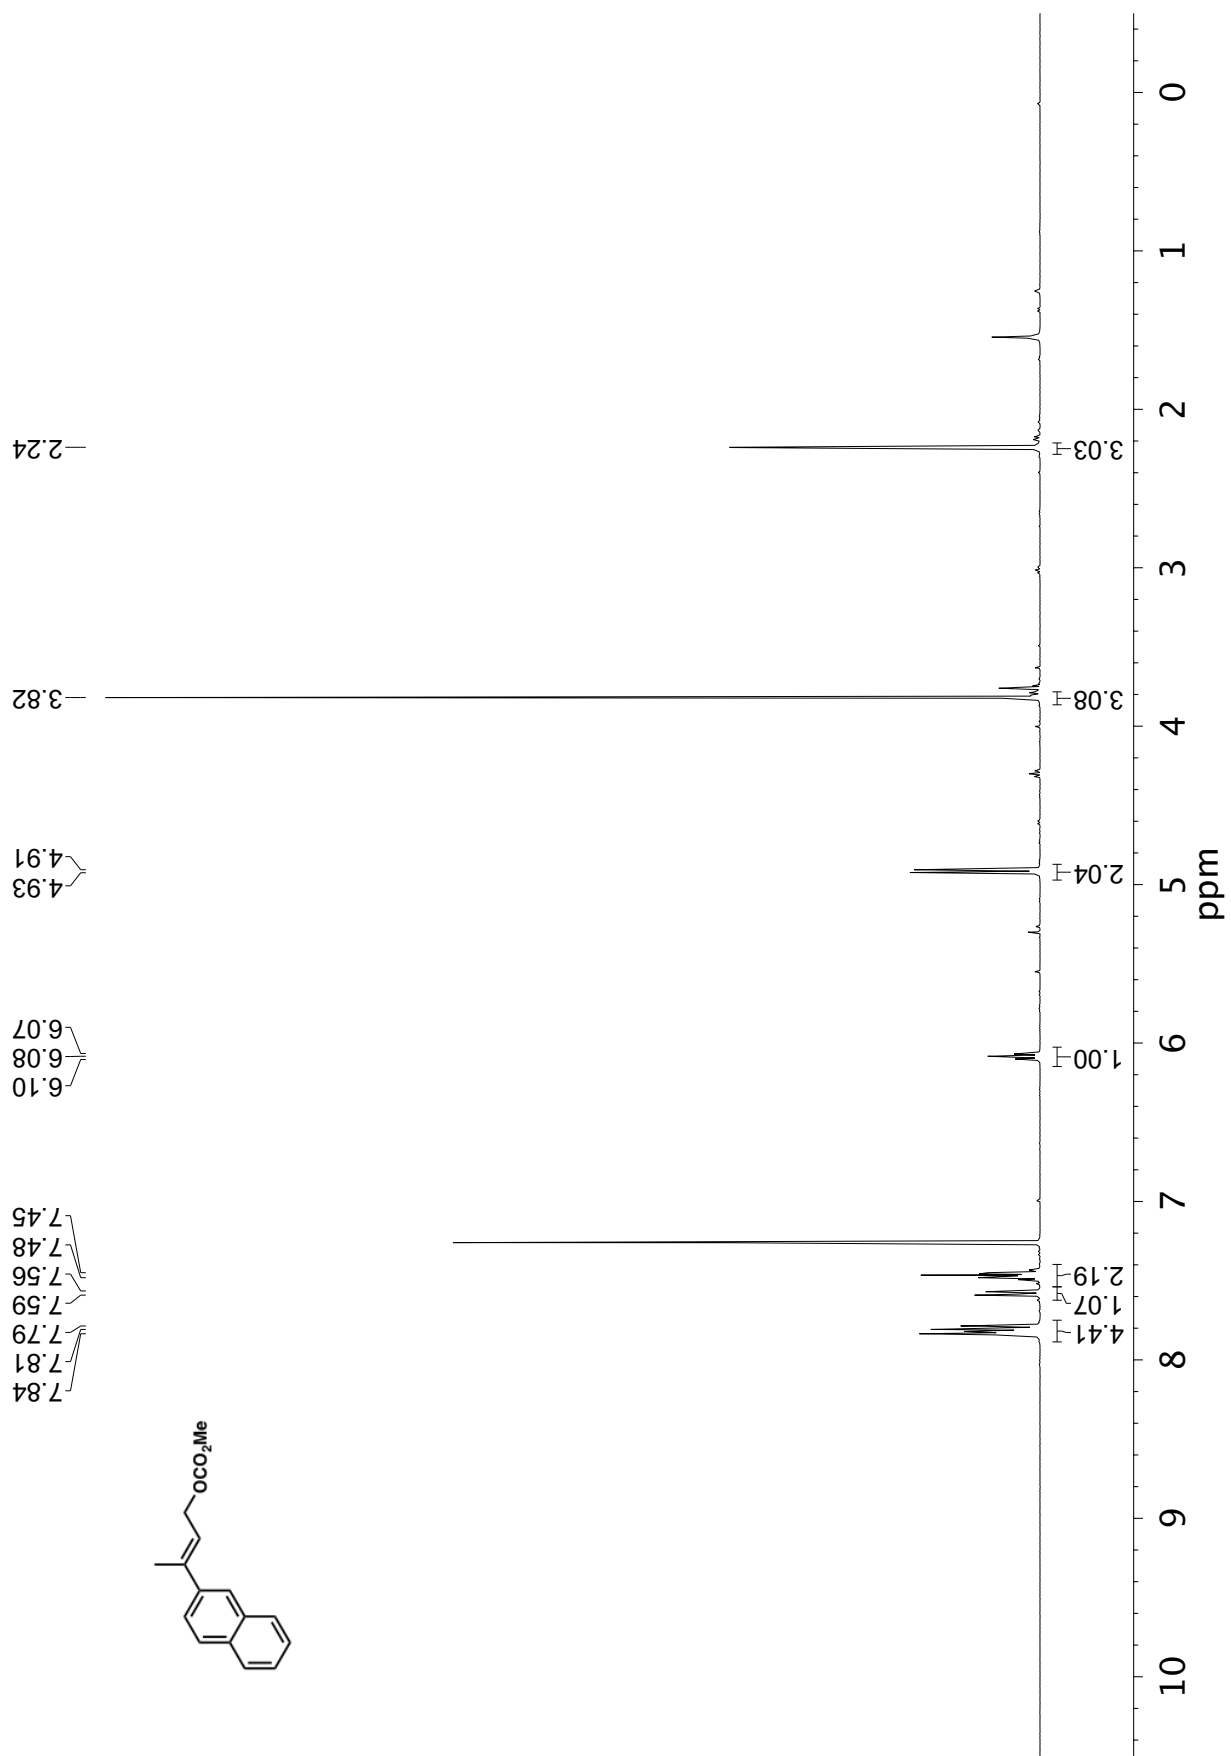

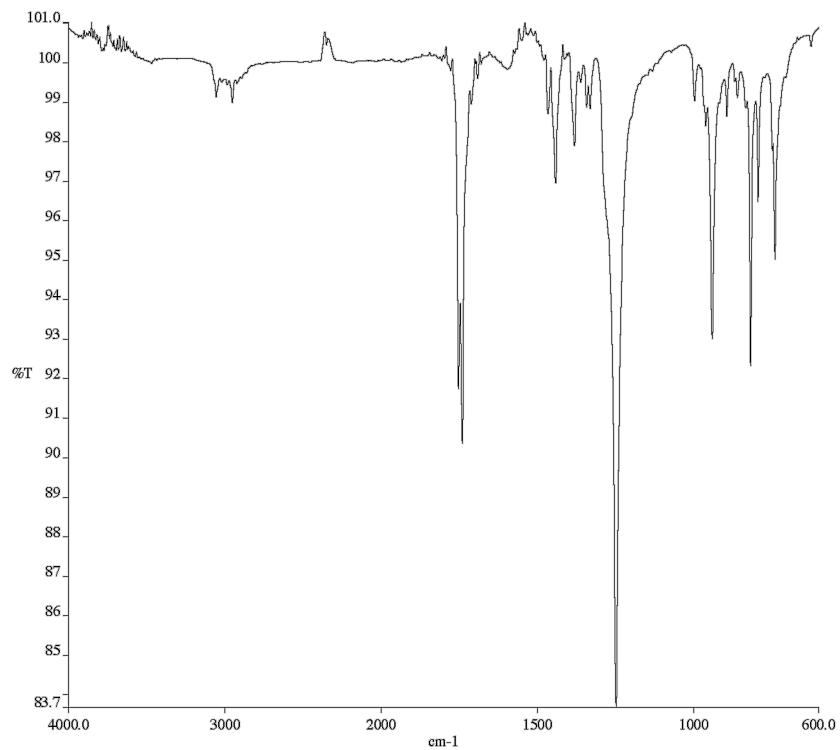

Infrared spectrum (Thin Film, NaCl) of compound **6i**.

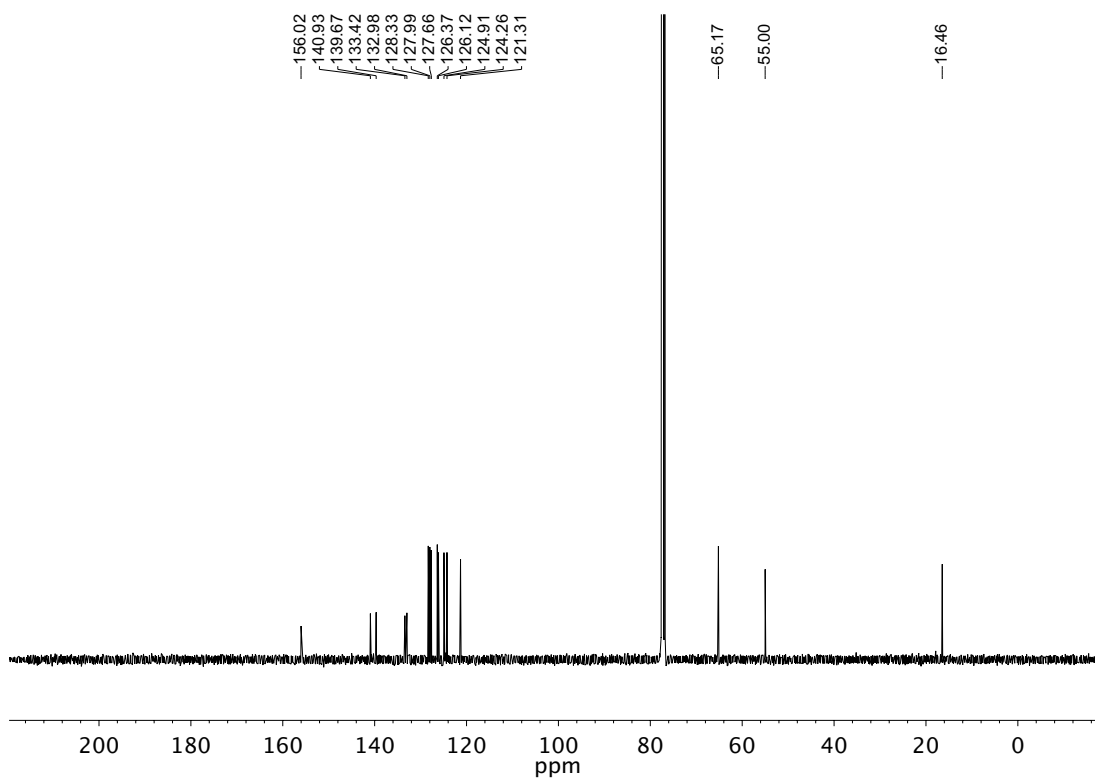

<sup>13</sup>C NMR (101 MHz, CDCl<sub>3</sub>) of compound **6i**.

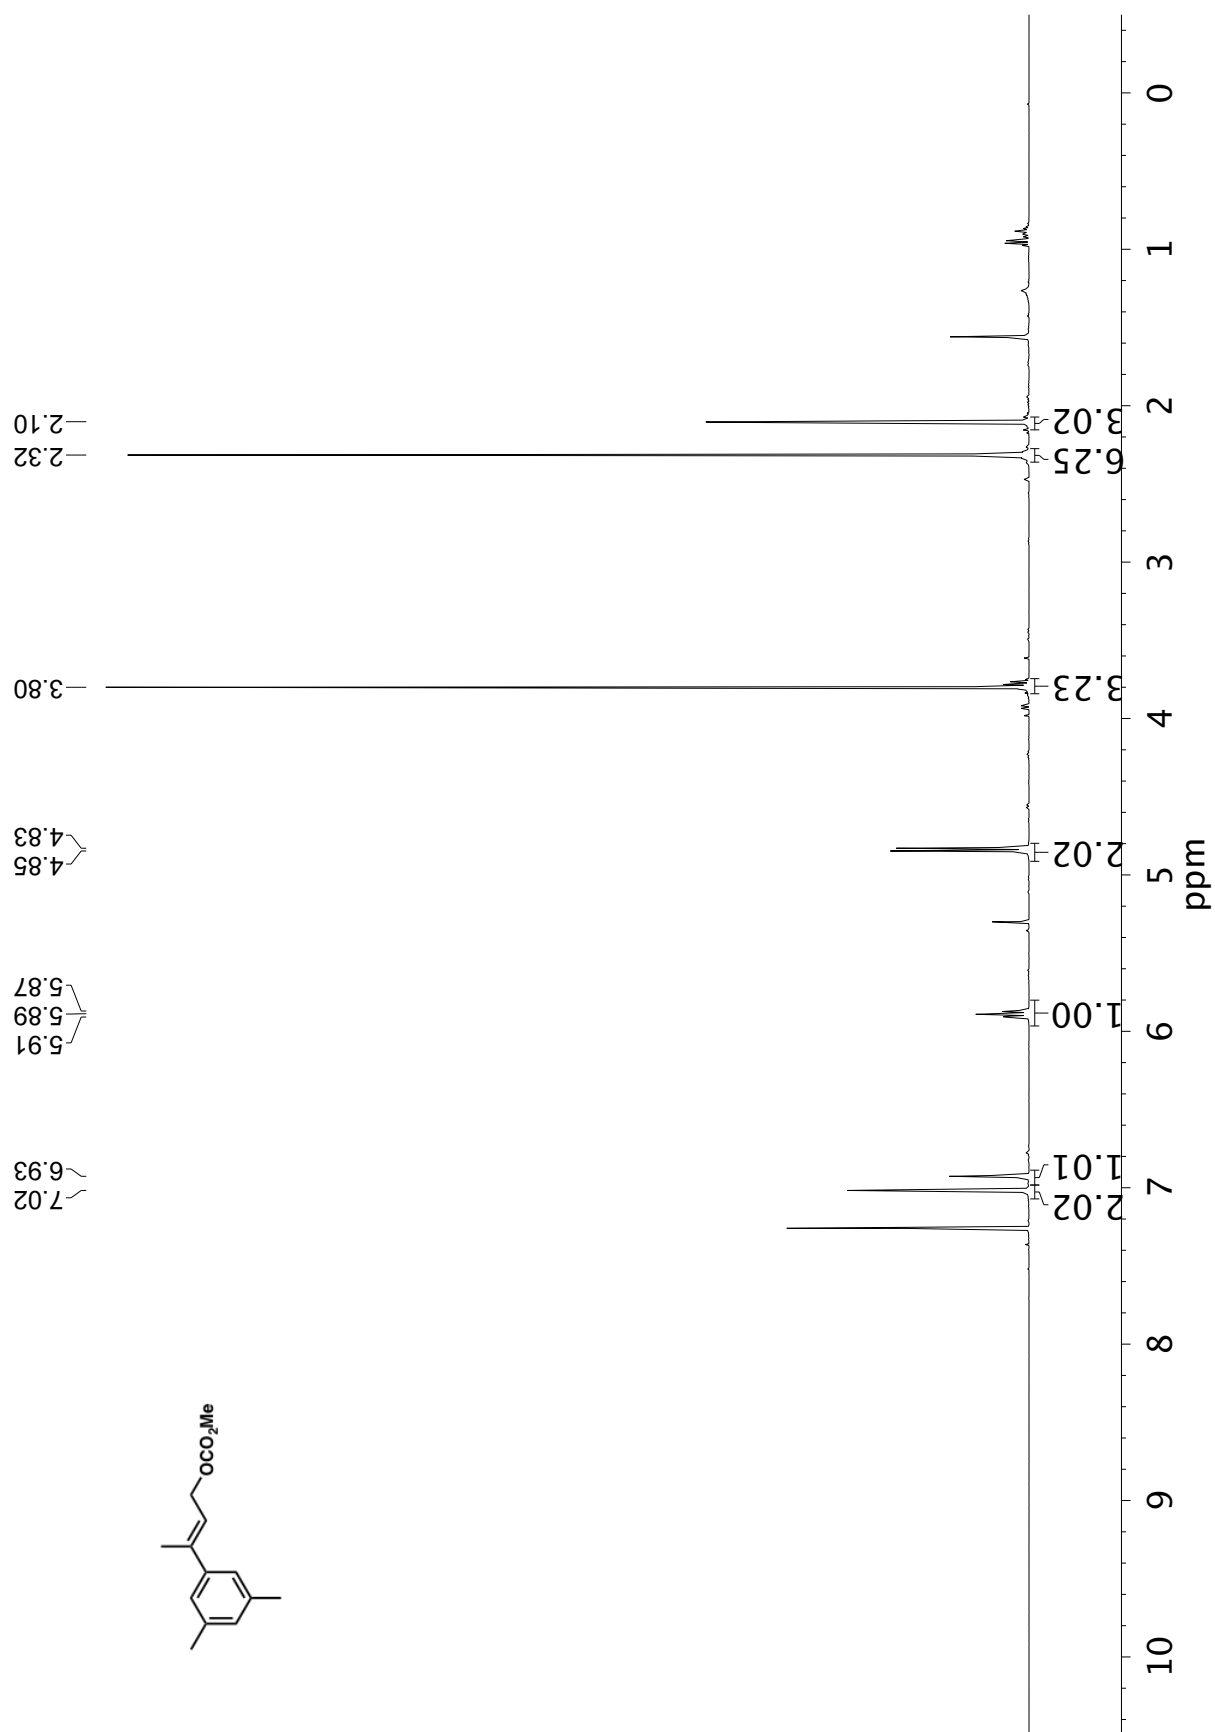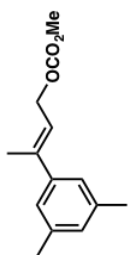

<sup>1</sup>H NMR (400 MHz, CDCl<sub>3</sub>) of compound **6k**.

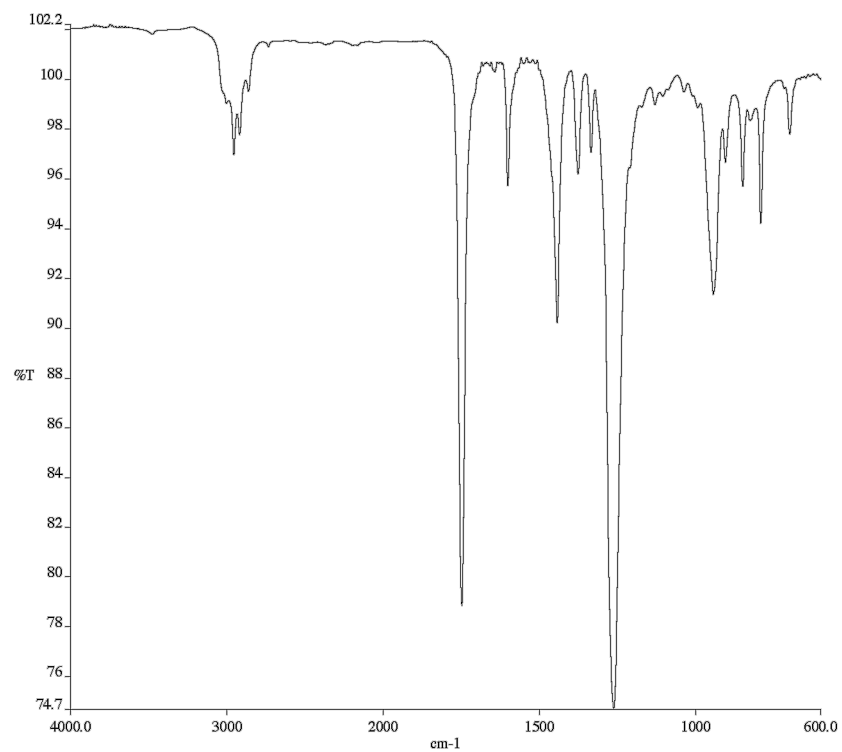

Infrared spectrum (Thin Film, NaCl) of compound **6k**.

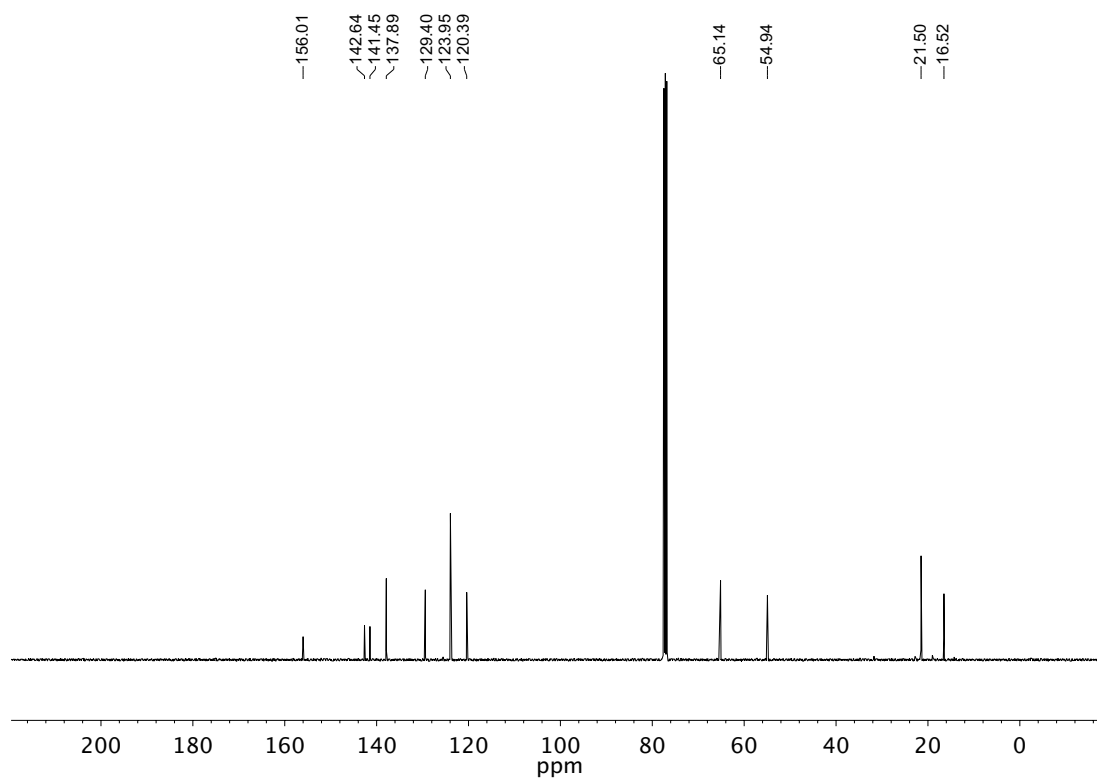

<sup>13</sup>C NMR (101 MHz, CDCl<sub>3</sub>) of compound **6k**.



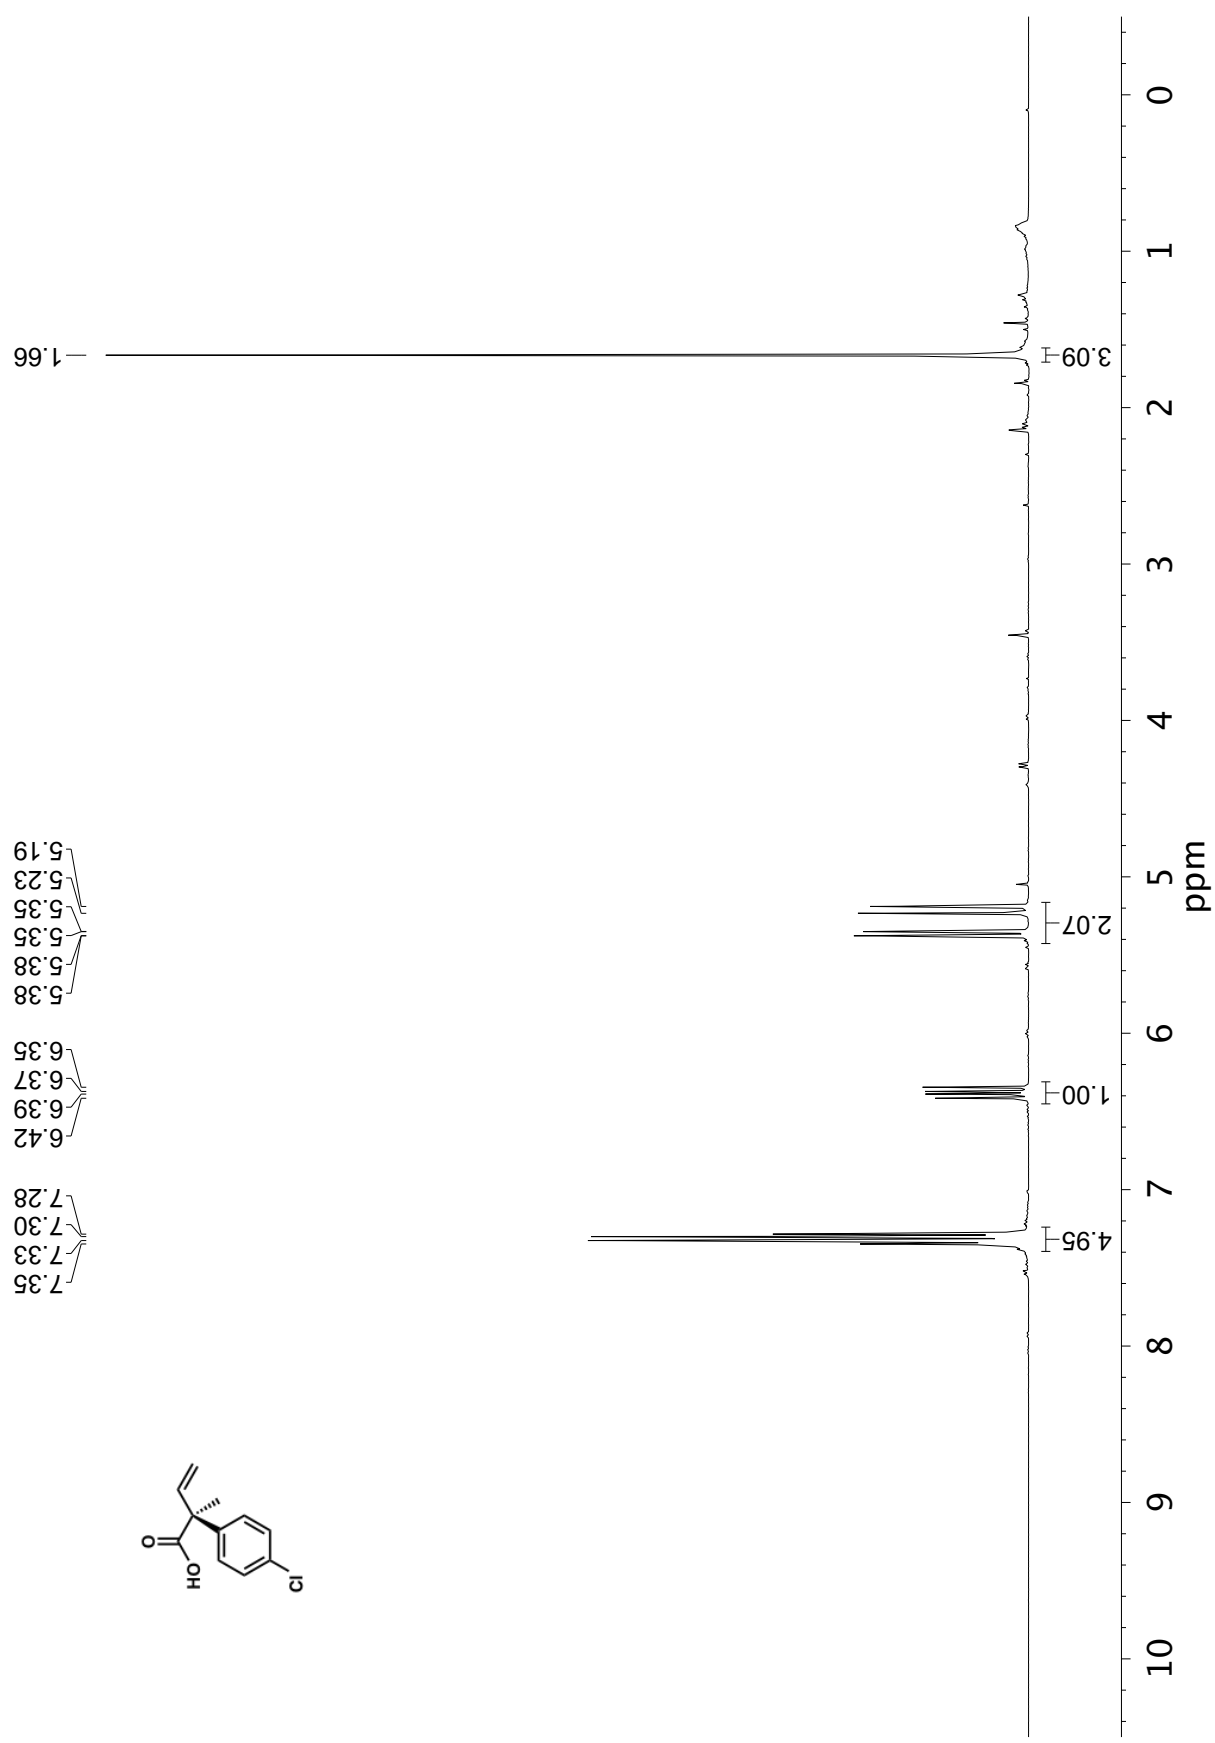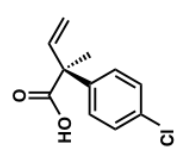

<sup>1</sup>H NMR (400 MHz, CDCl<sub>3</sub>) of compound 7b.

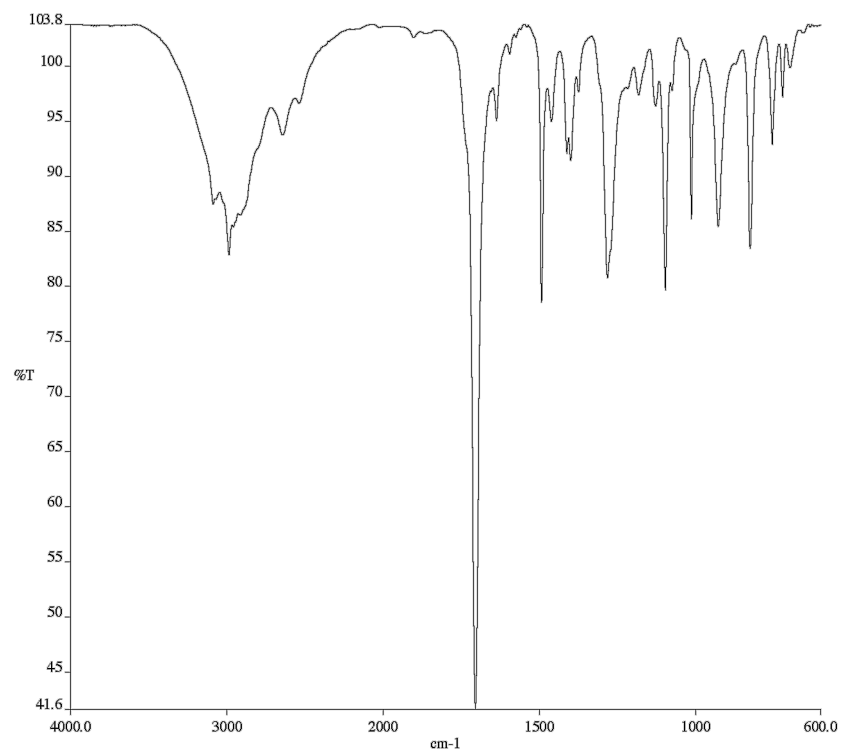

Infrared spectrum (Thin Film, NaCl) of compound **7b**.

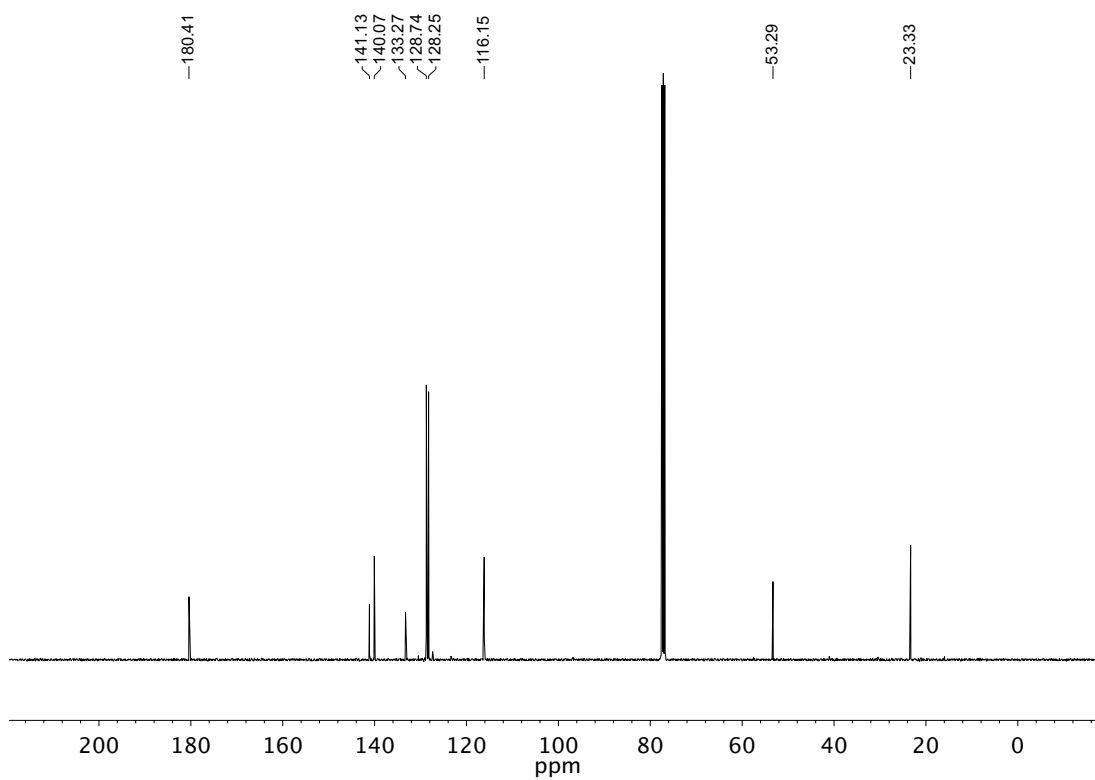

<sup>13</sup>C NMR (101 MHz, CDCl<sub>3</sub>) of compound **7b**.

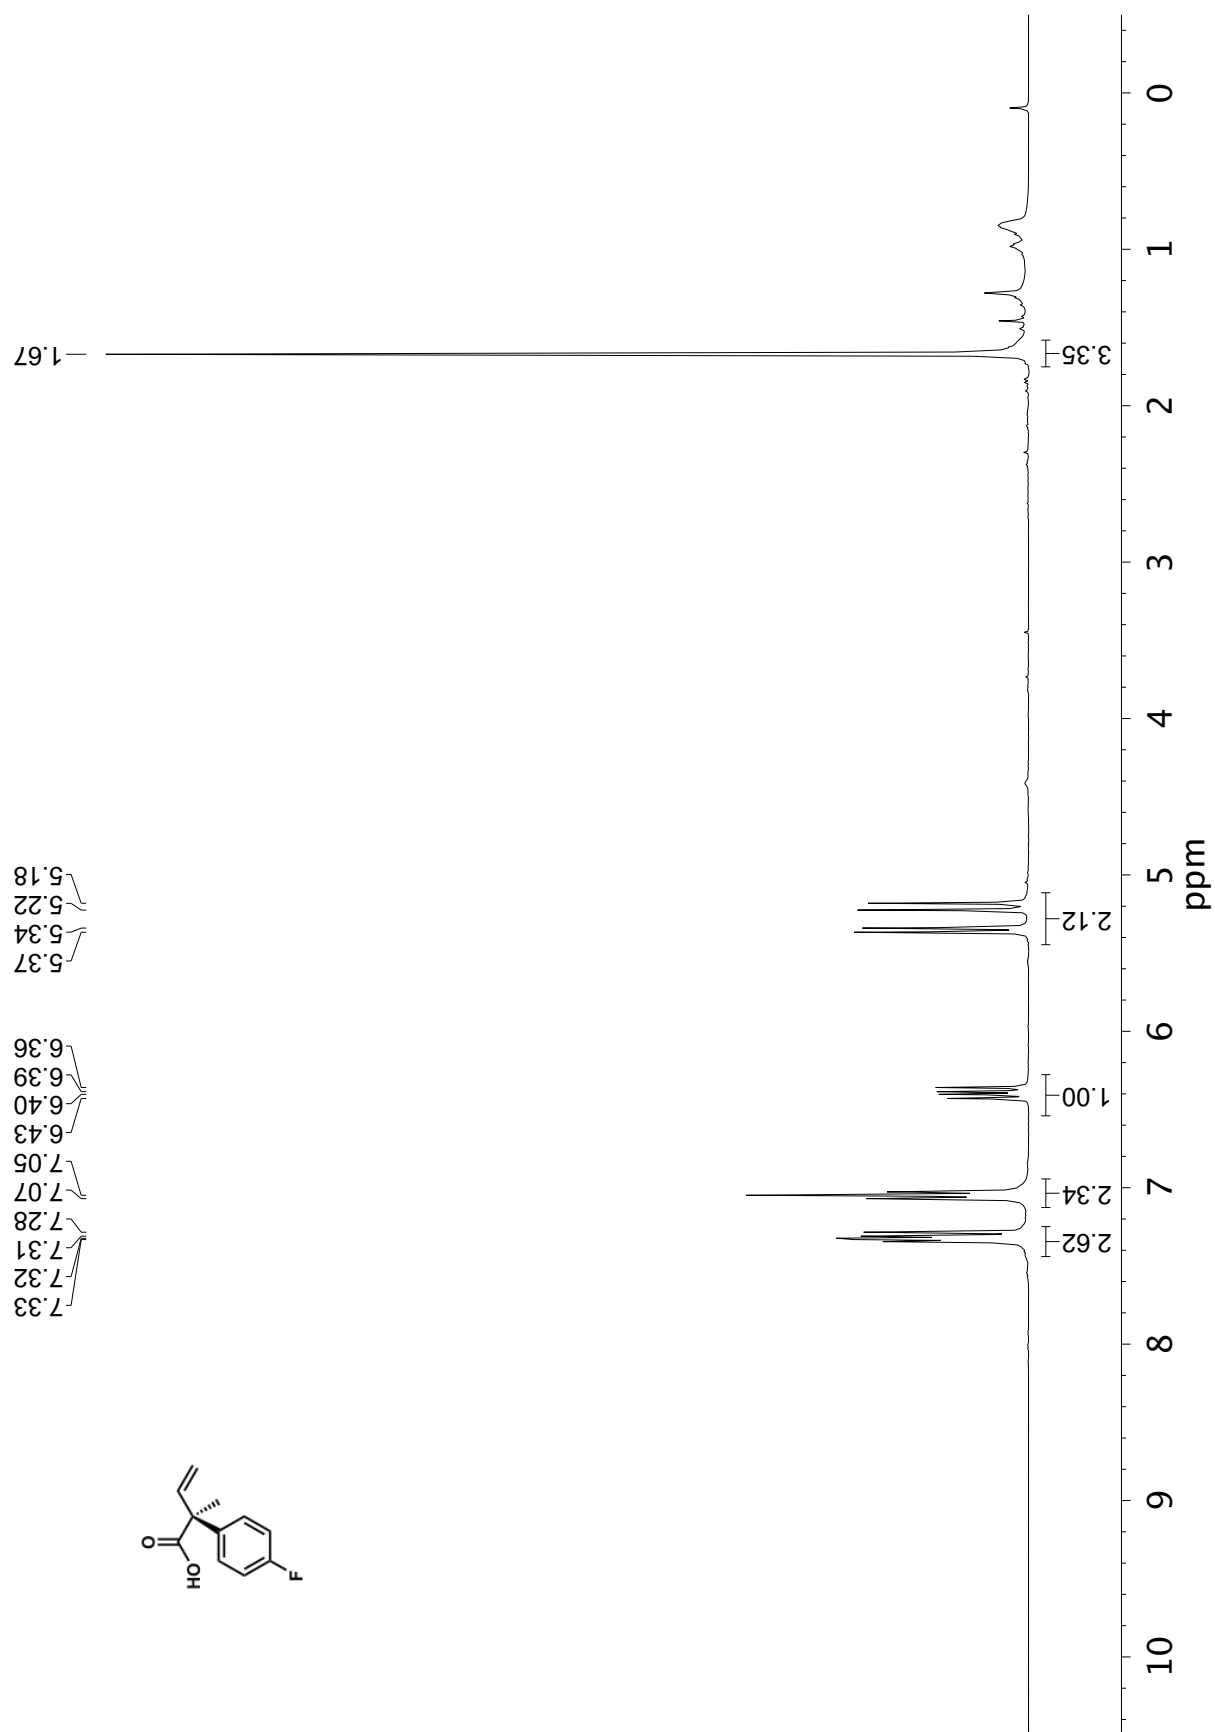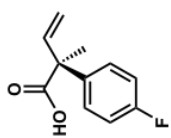

<sup>1</sup>H NMR (400 MHz, CDCl<sub>3</sub>) of compound 7c.

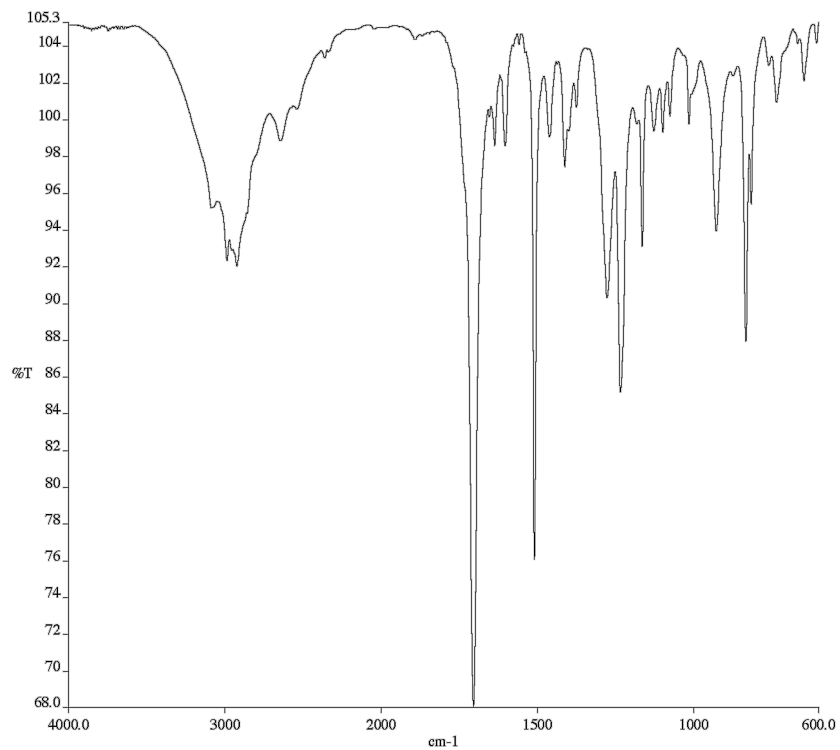

Infrared spectrum (Thin Film, NaCl) of compound **7c**.

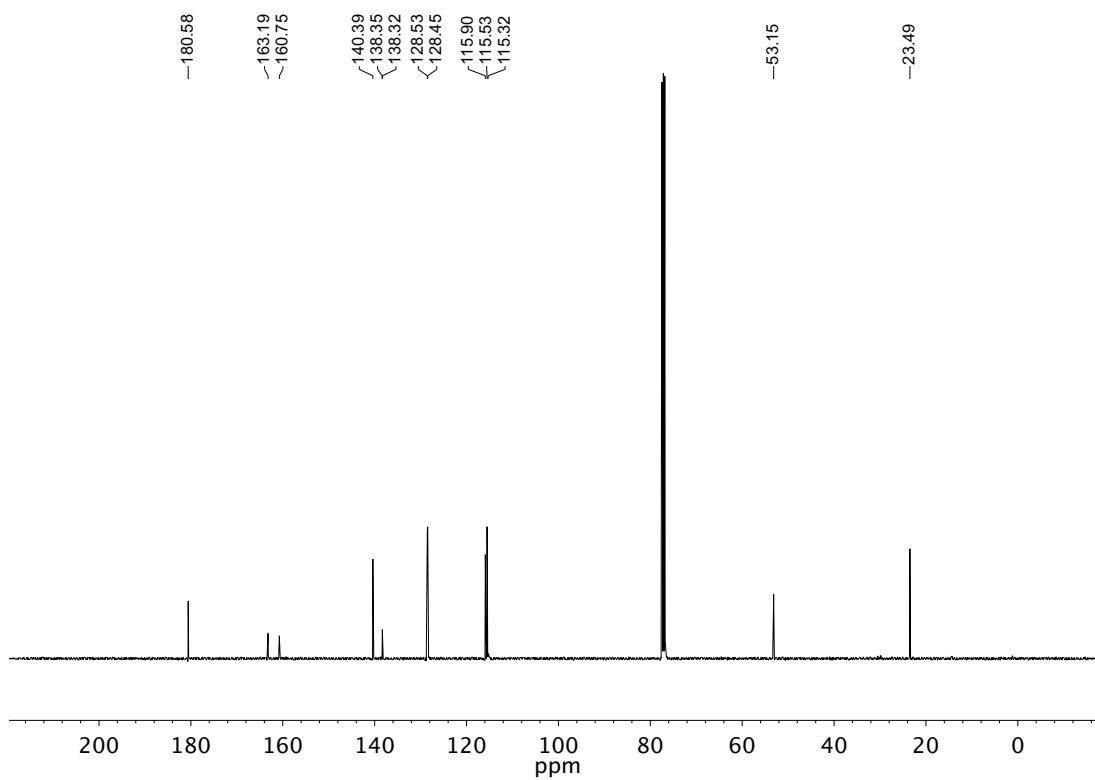

<sup>13</sup>C NMR (101 MHz, CDCl<sub>3</sub>) of compound **7c**.

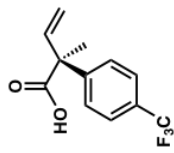

7.61  
7.59  
7.46  
7.44  
6.41  
6.39  
6.37  
6.34  
5.40  
5.37  
5.24  
5.20  
-1.68

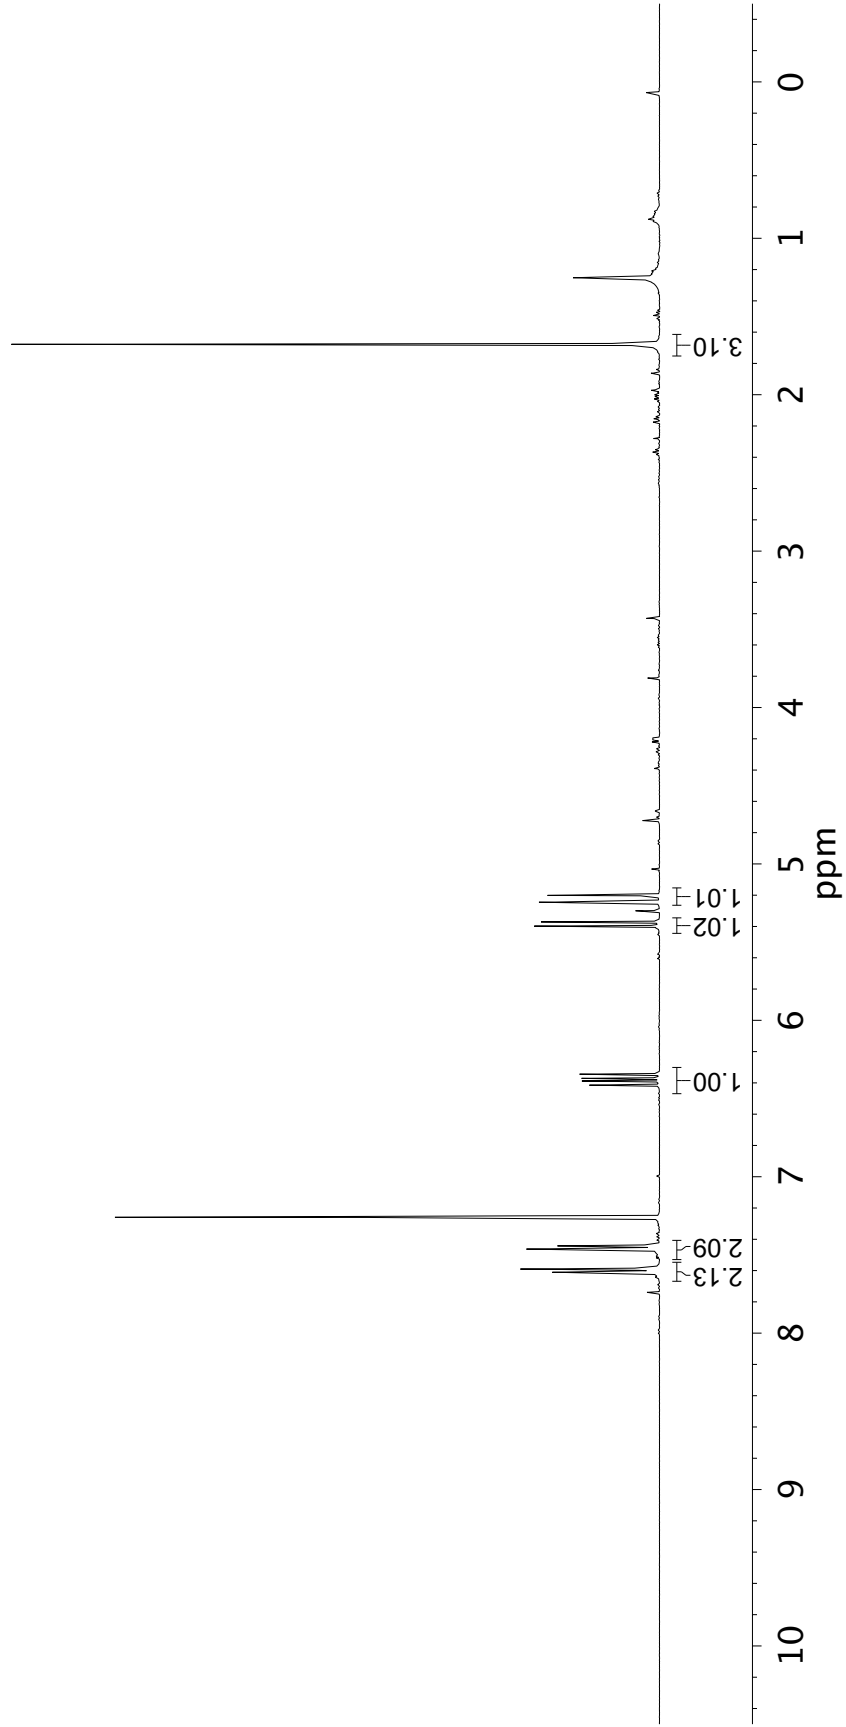

<sup>1</sup>H NMR (400 MHz, CDCl<sub>3</sub>) of compound 7d.

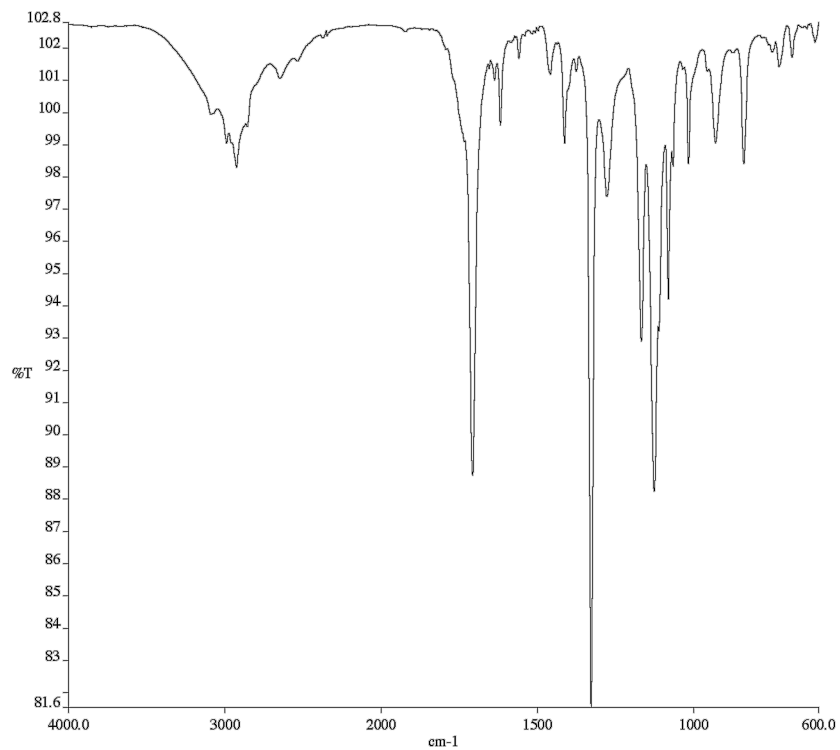

Infrared spectrum (Thin Film, NaCl) of compound **7d**.

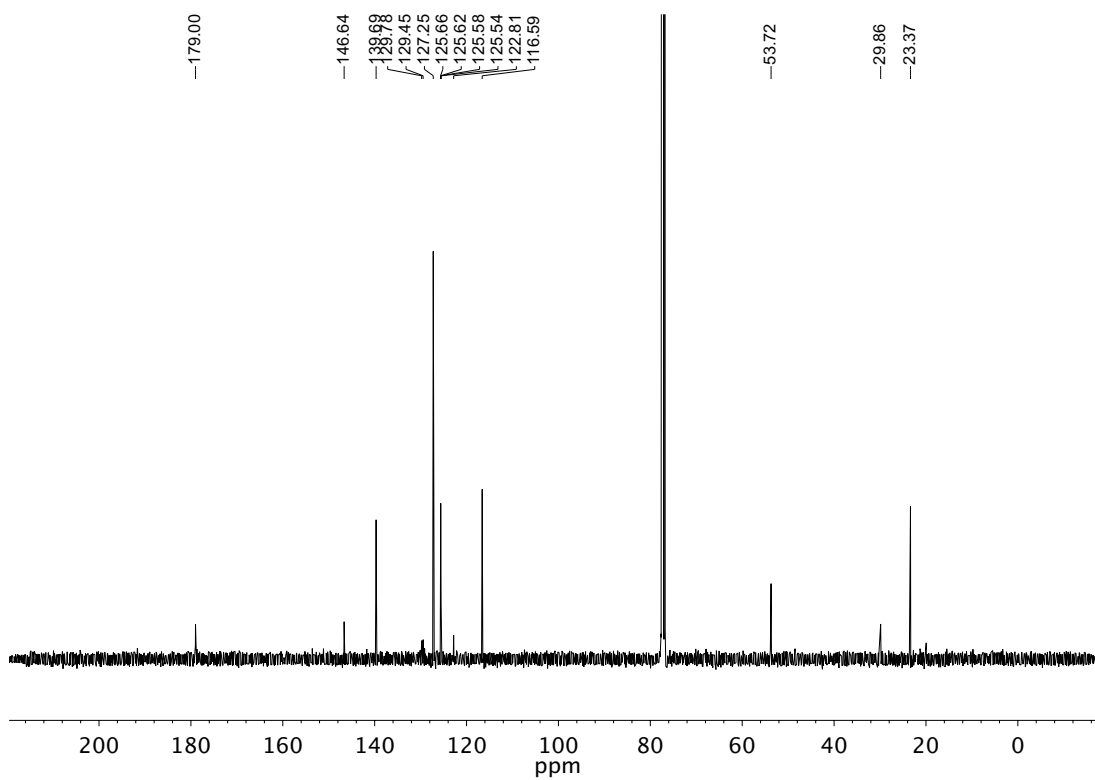

<sup>13</sup>C NMR (101 MHz, CDCl<sub>3</sub>) of compound **7d**.

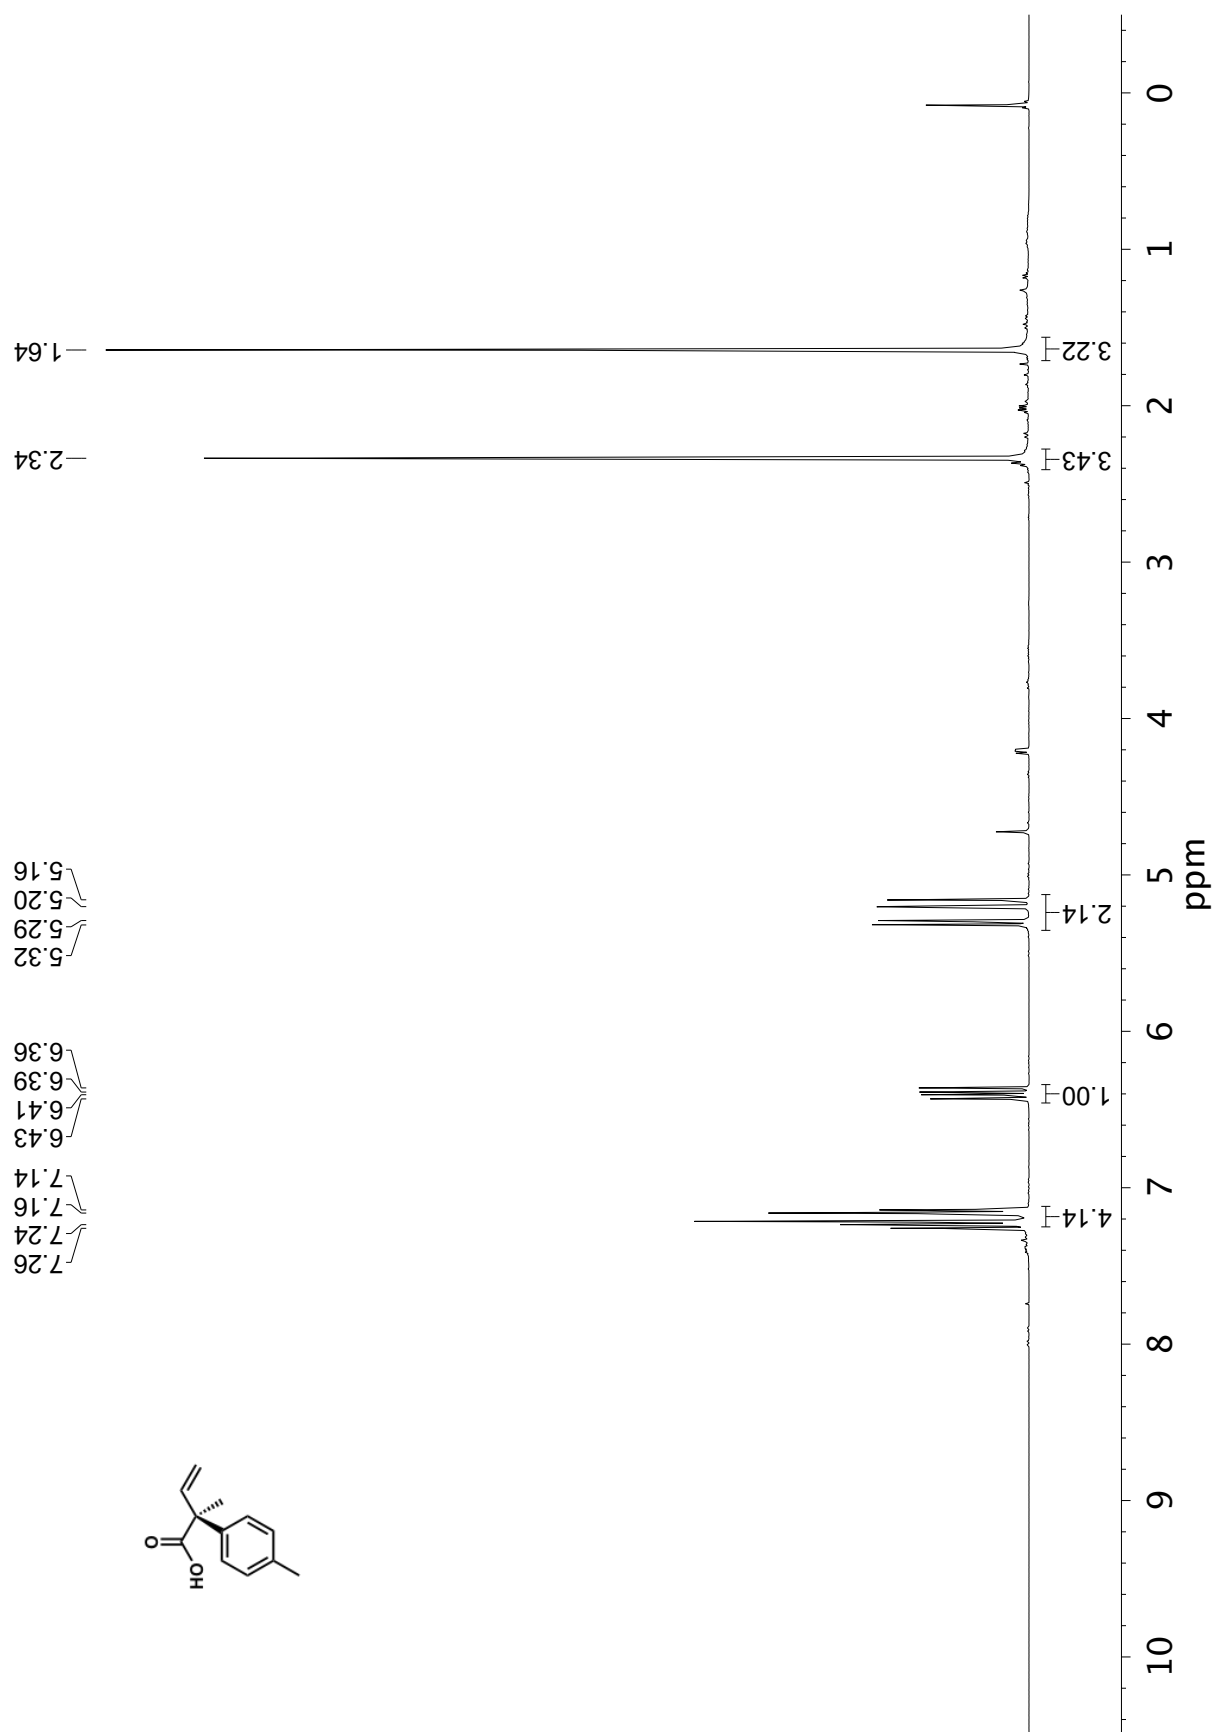

<sup>1</sup>H NMR (400 MHz, CDCl<sub>3</sub>) of compound 7c.

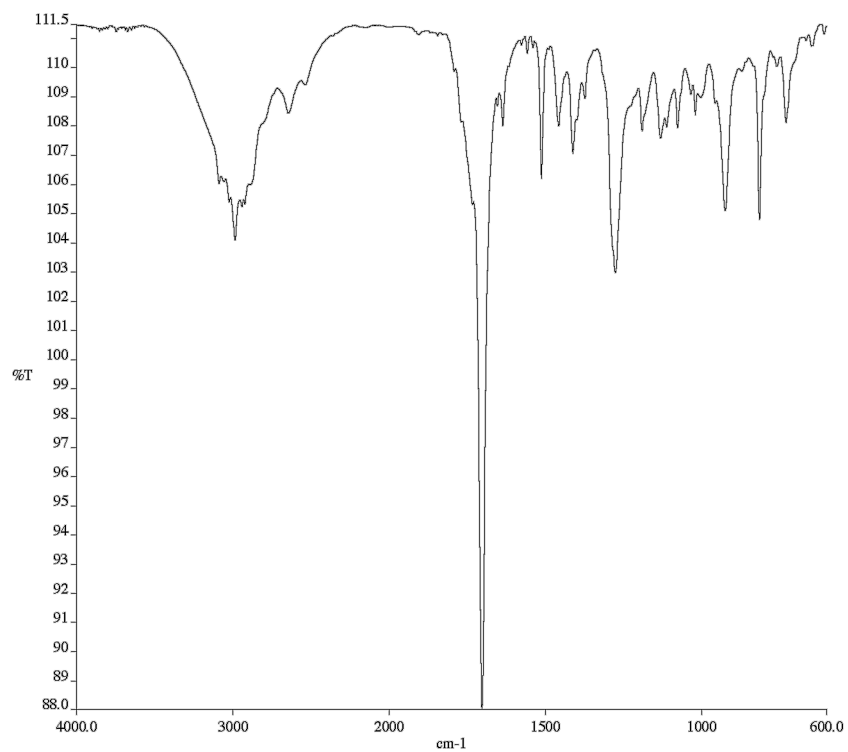

Infrared spectrum (Thin Film, NaCl) of compound **7e**.

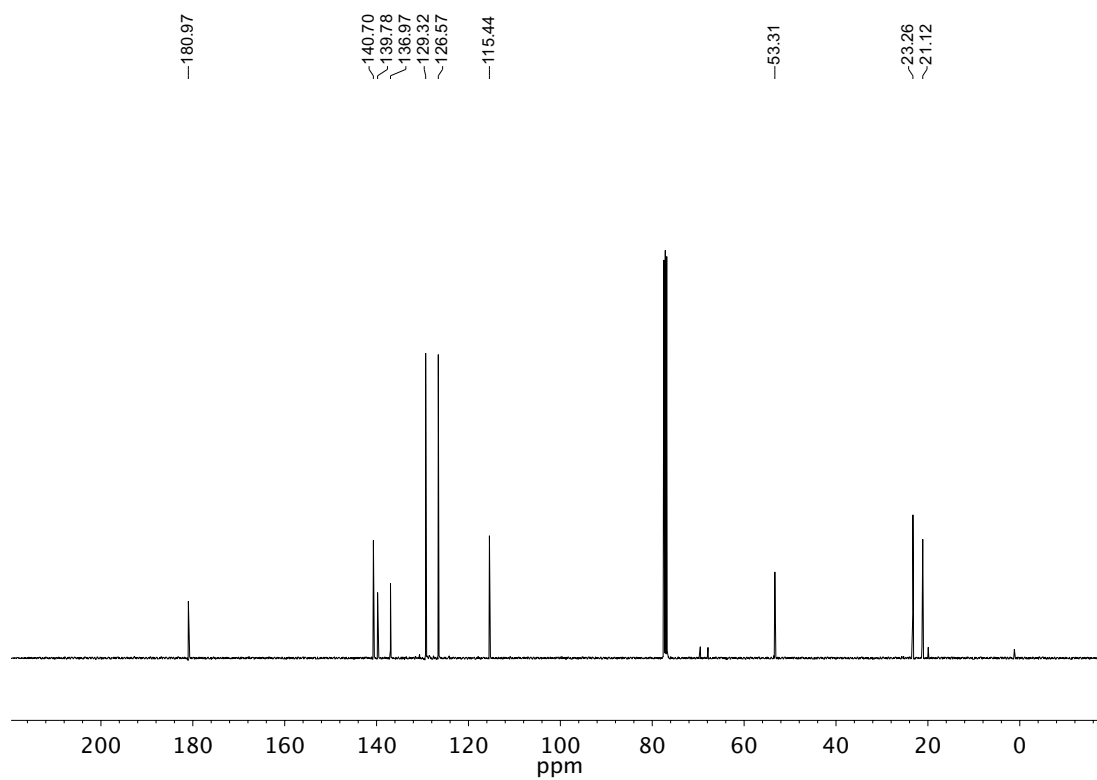

<sup>13</sup>C NMR (101 MHz, CDCl<sub>3</sub>) of compound **7e**.



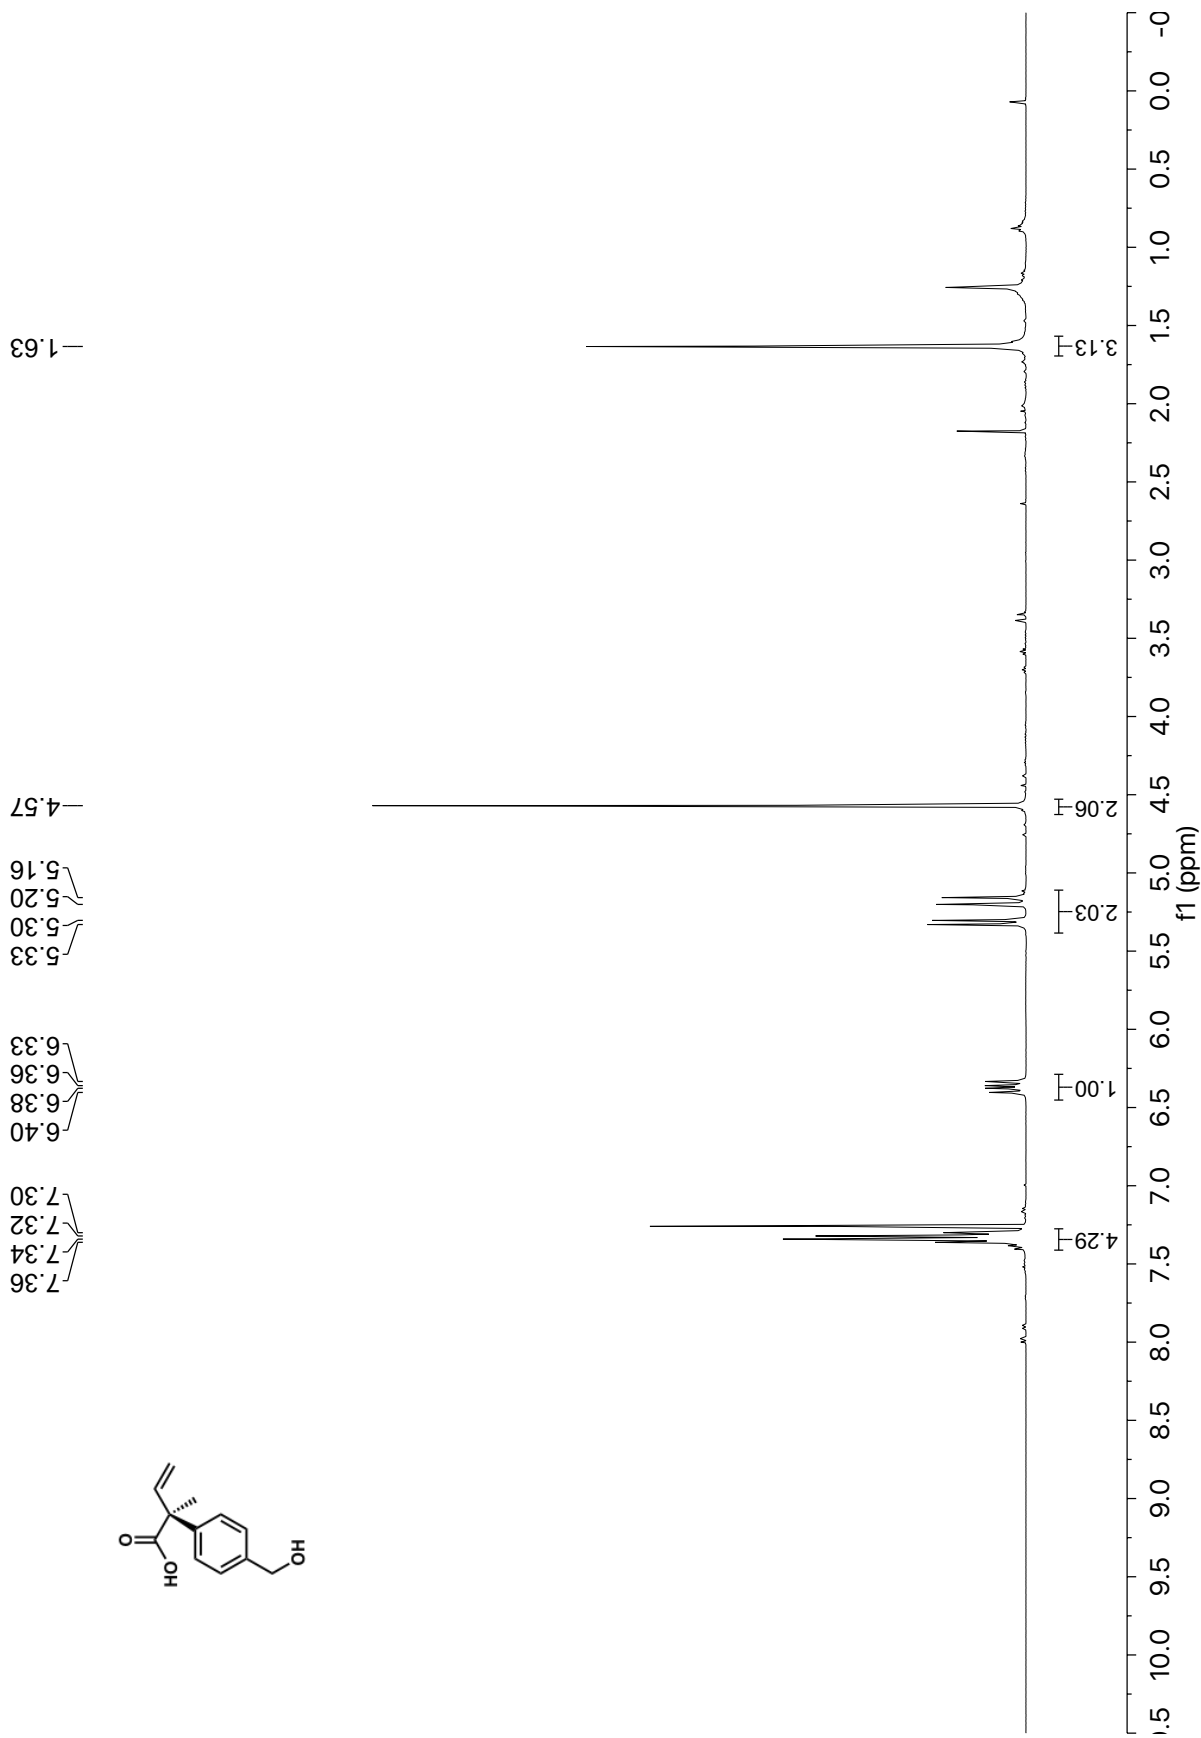

<sup>1</sup>H NMR (400 MHz, CDCl<sub>3</sub>) of compound 7f.

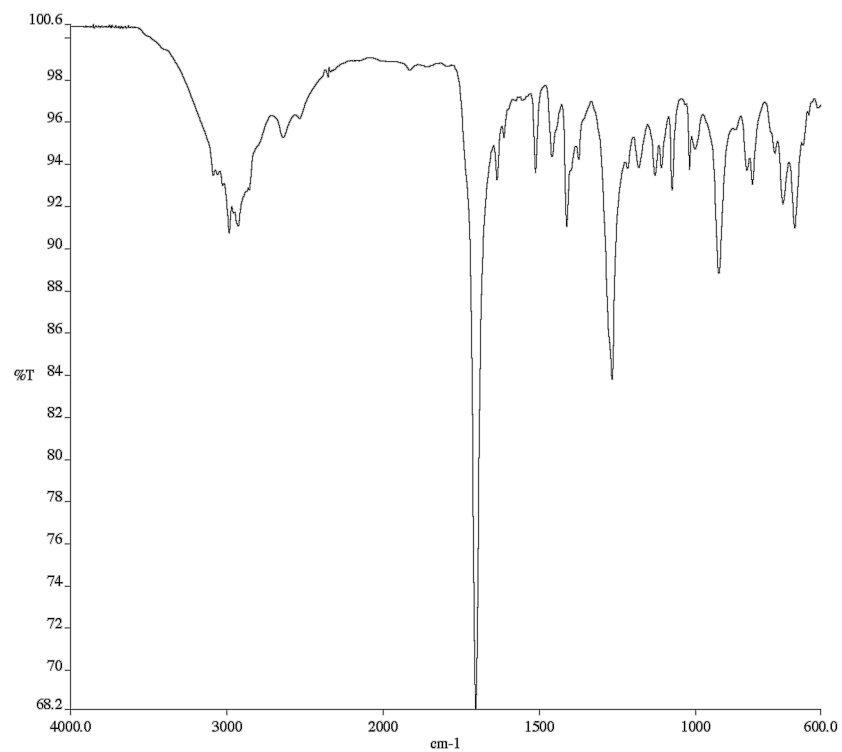

Infrared spectrum (Thin Film, NaCl) of compound **7f**.

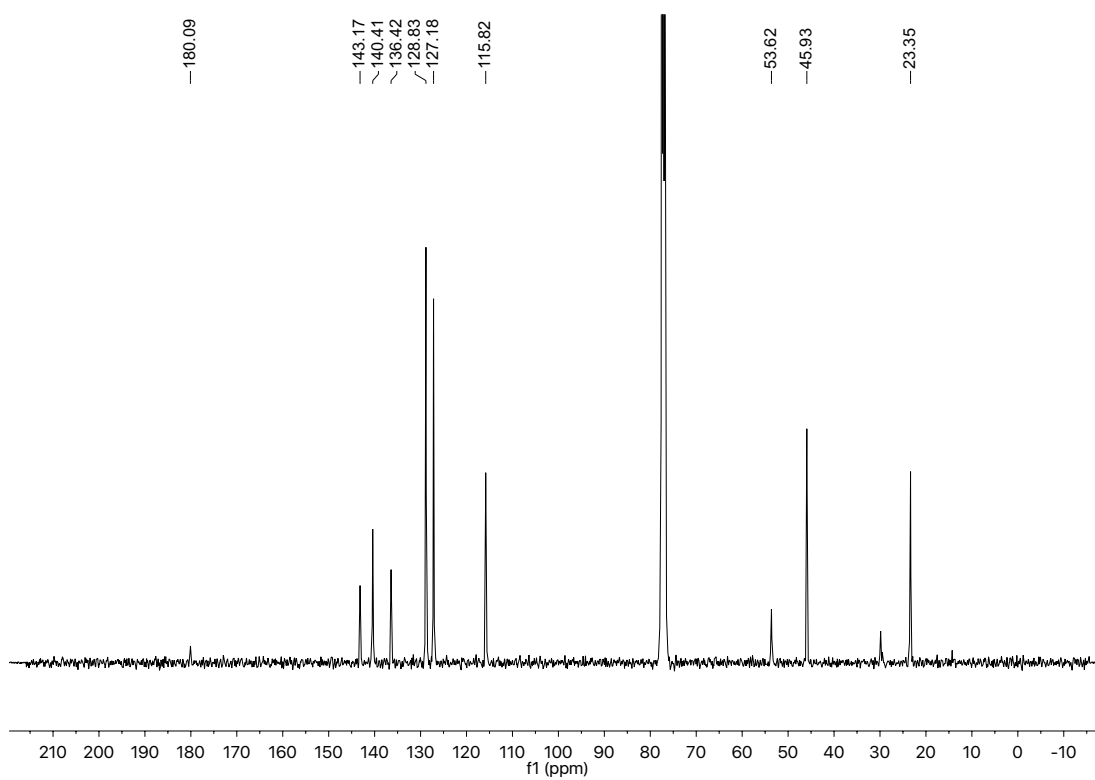

<sup>13</sup>C NMR (101 MHz, CDCl<sub>3</sub>) of compound **7f**.

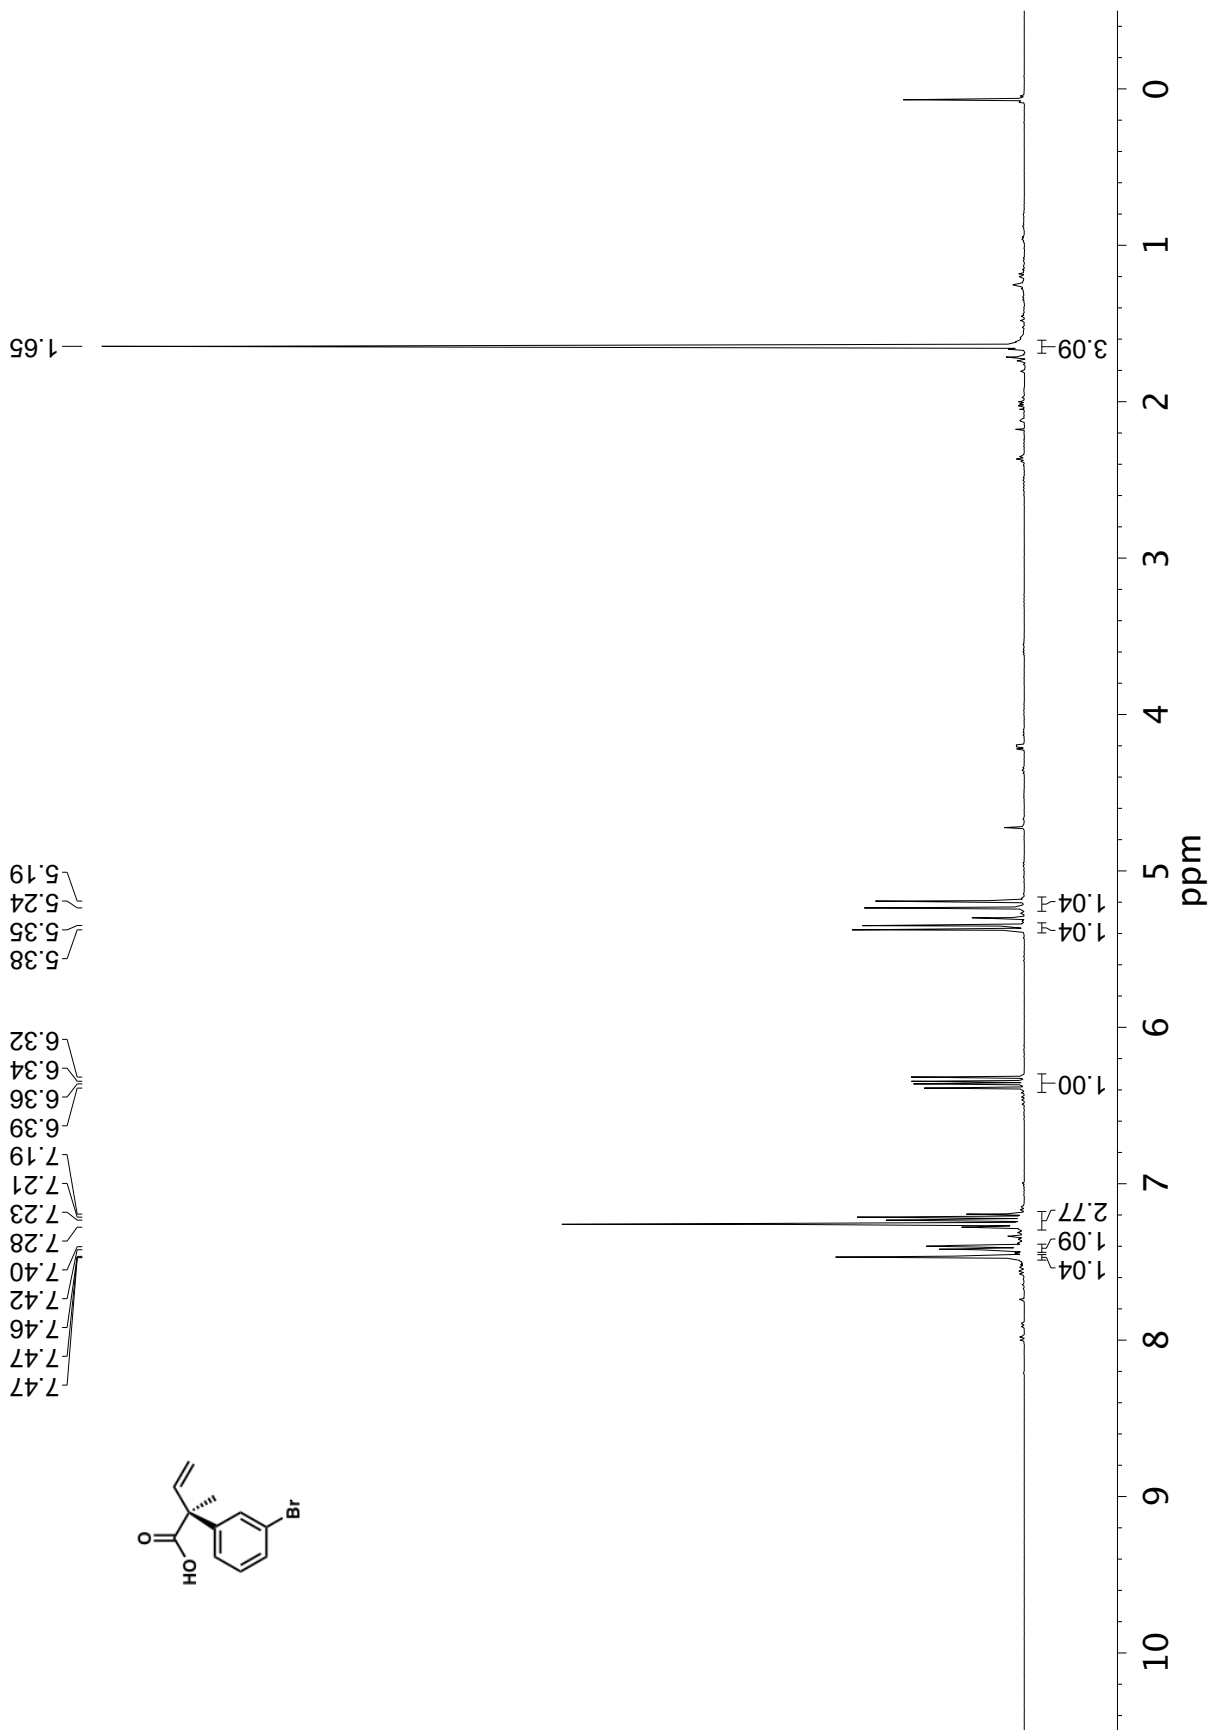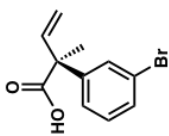

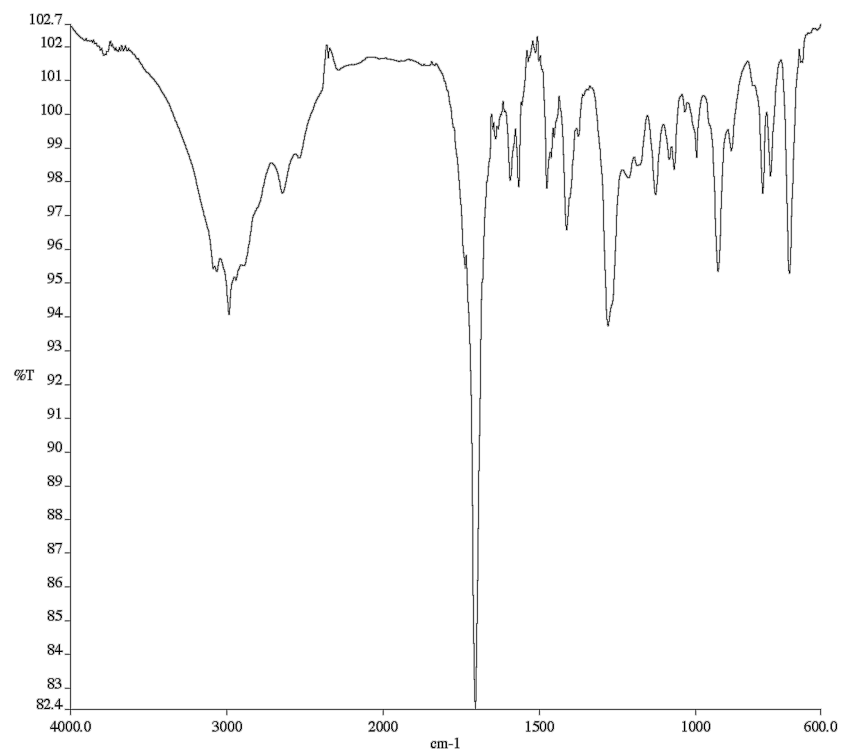

Infrared spectrum (Thin Film, NaCl) of compound **7g**.

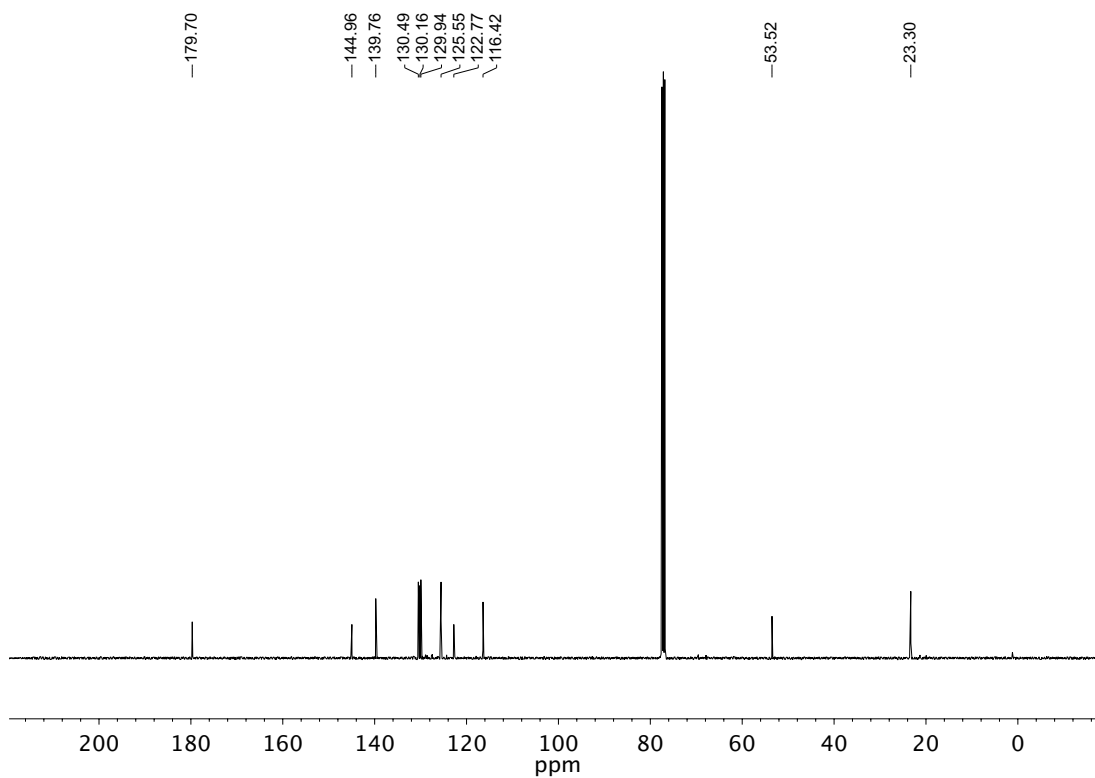

<sup>13</sup>C NMR (101 MHz, CDCl<sub>3</sub>) of compound **7g**.

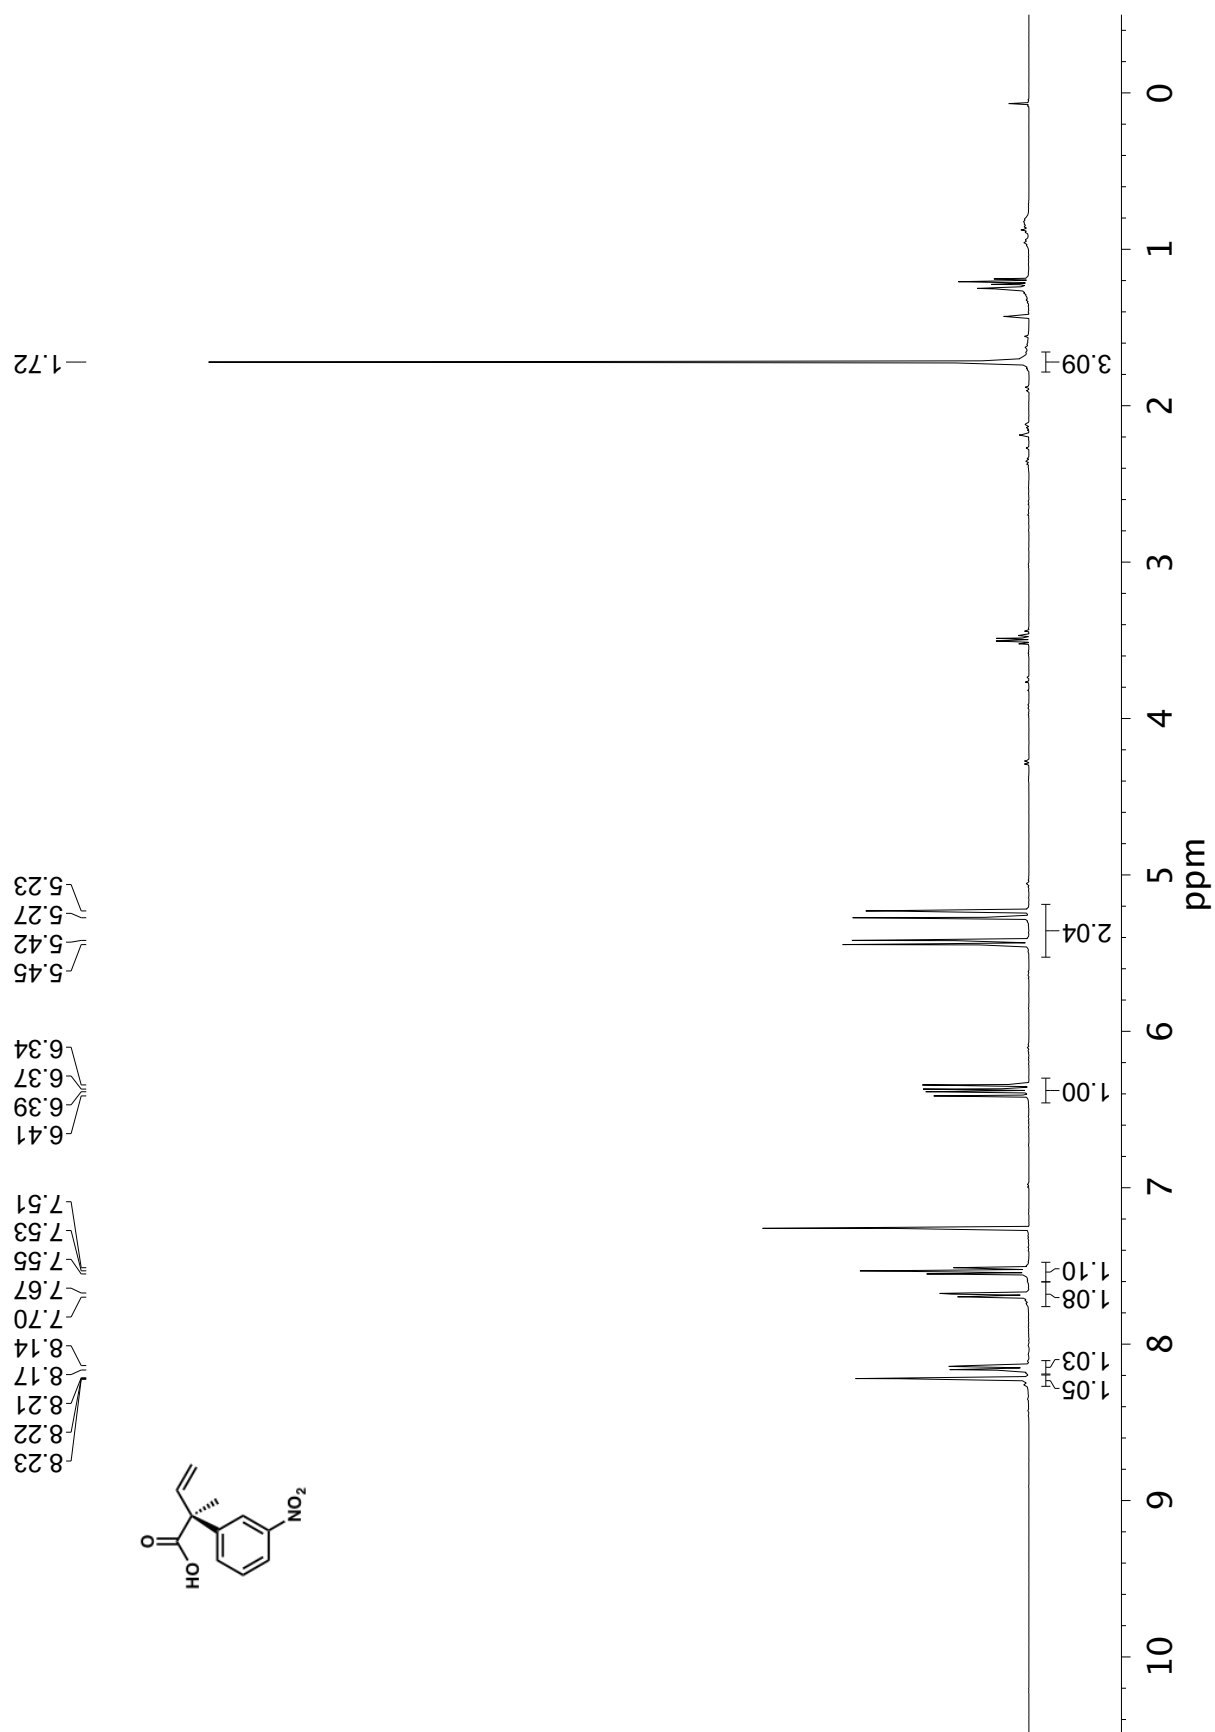

<sup>1</sup>H NMR (400 MHz, CDCl<sub>3</sub>) of compound 7h.

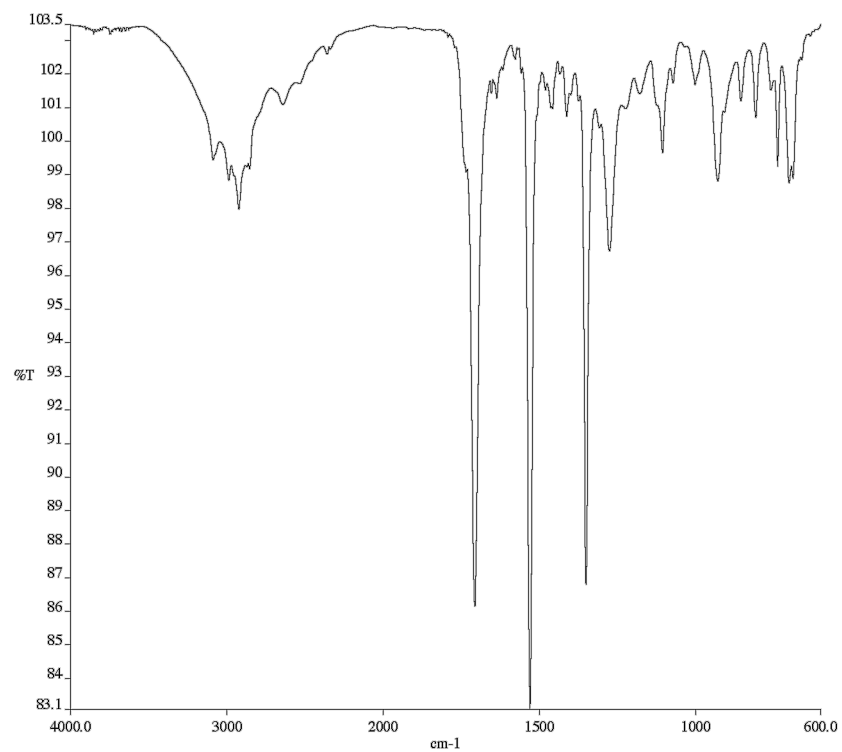

Infrared spectrum (Thin Film, NaCl) of compound **7h**.

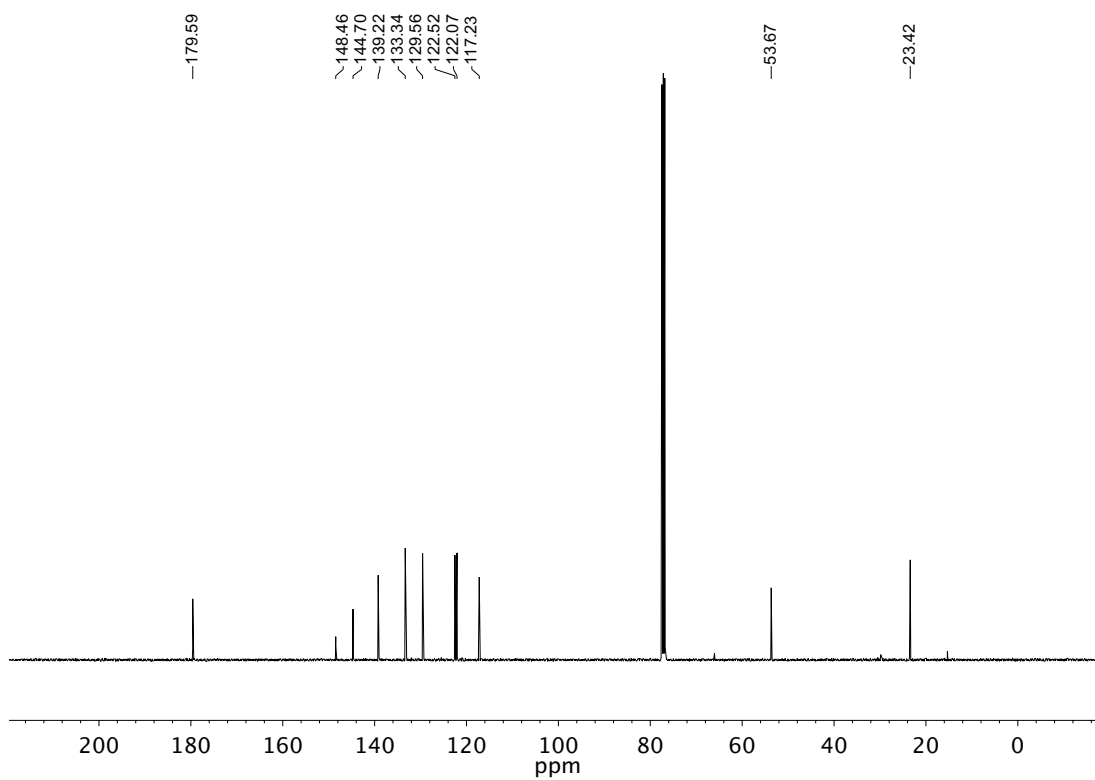

<sup>13</sup>C NMR (101 MHz, CDCl<sub>3</sub>) of compound **7h**.

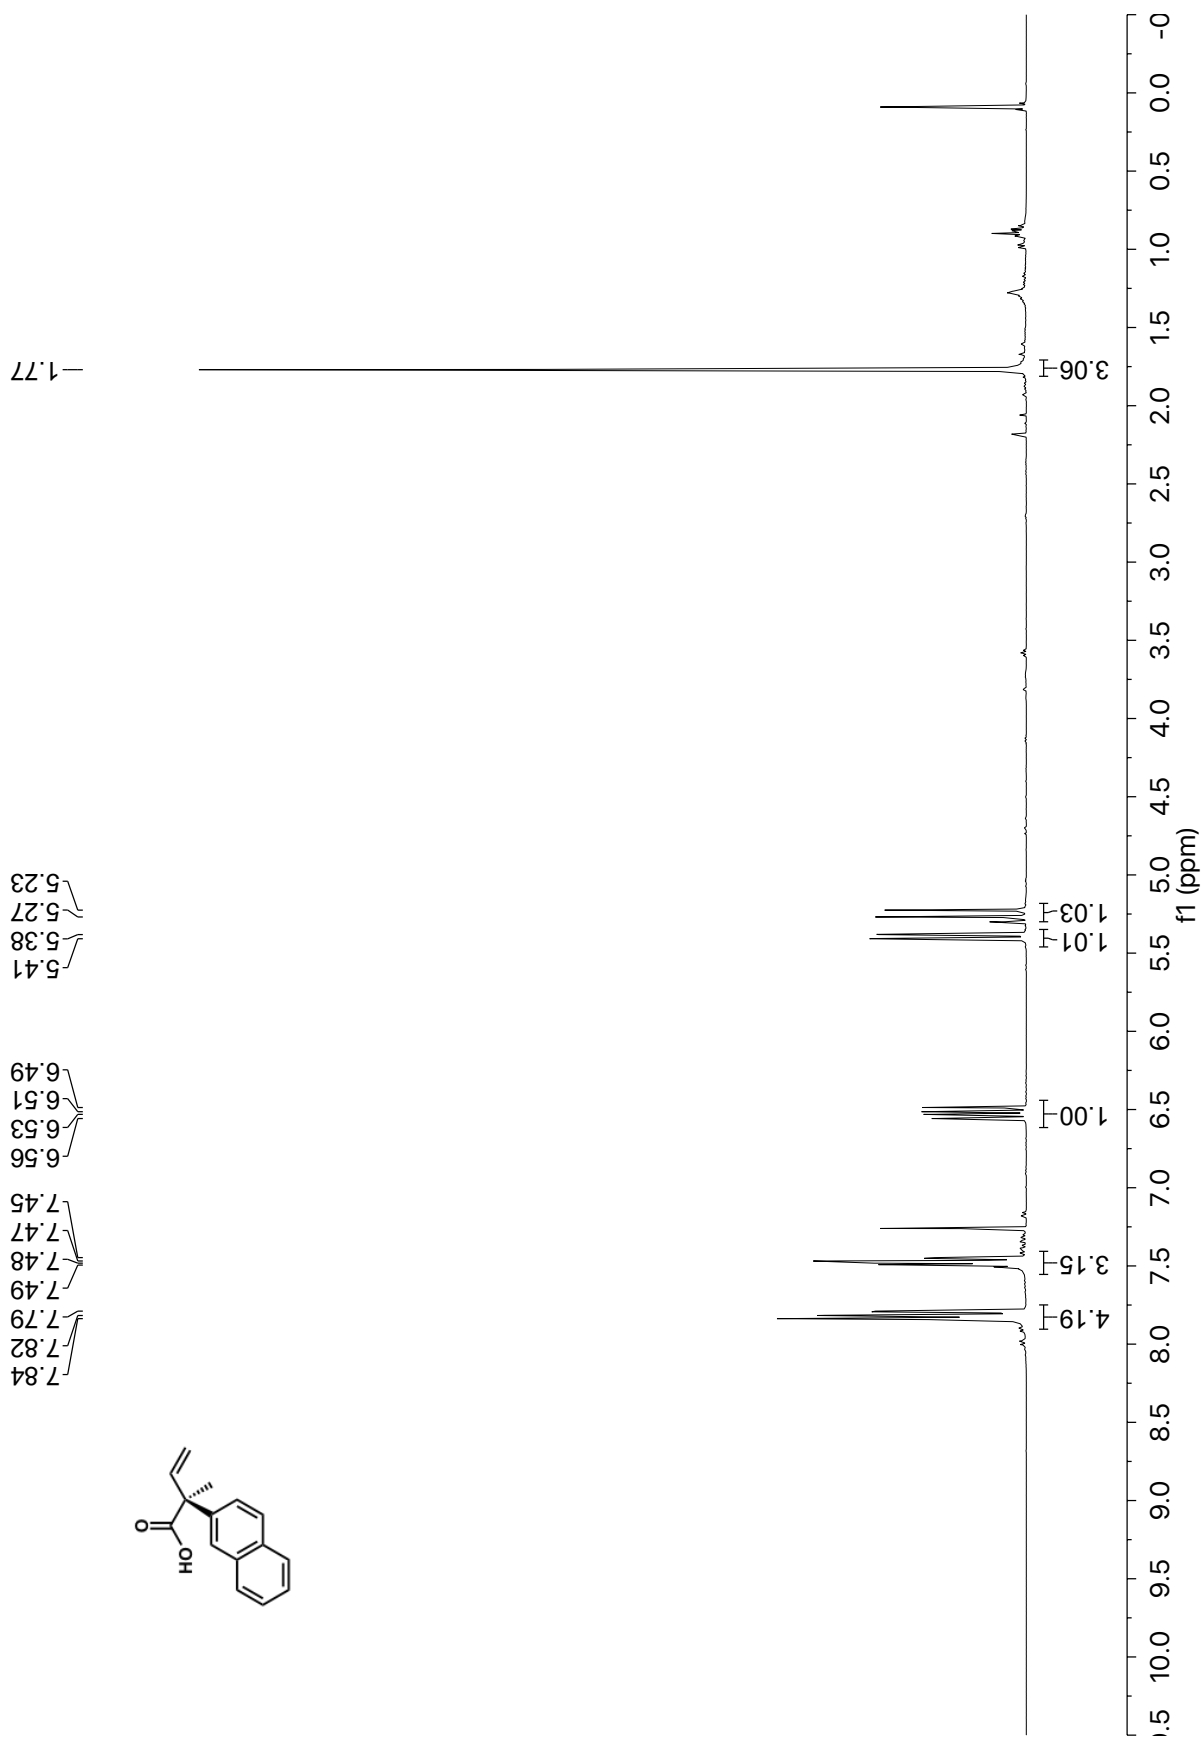

<sup>1</sup>H NMR (400 MHz, CDCl<sub>3</sub>) of compound 7i.

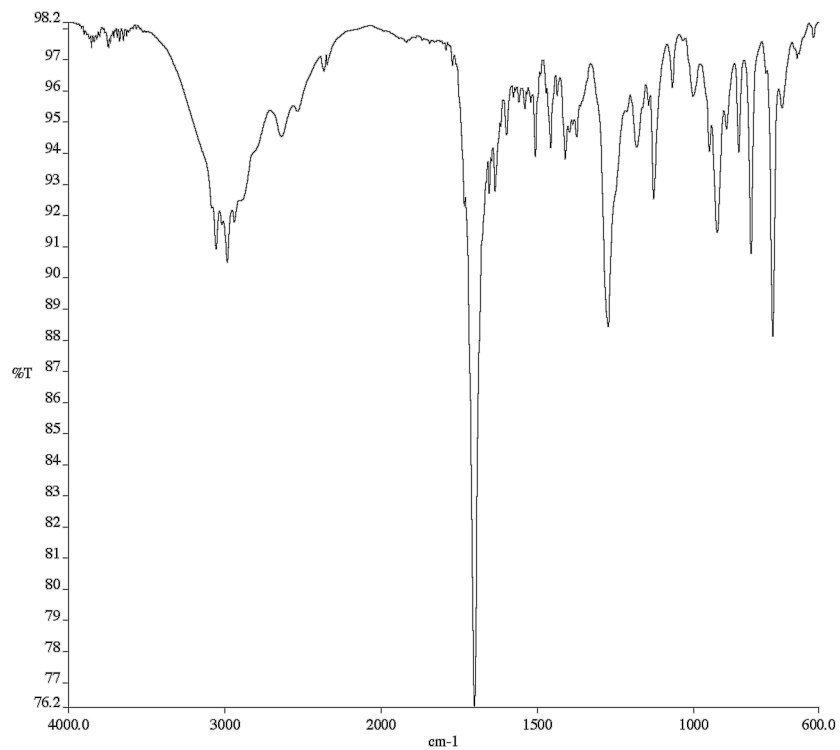

Infrared spectrum (Thin Film, NaCl) of compound **7i**.

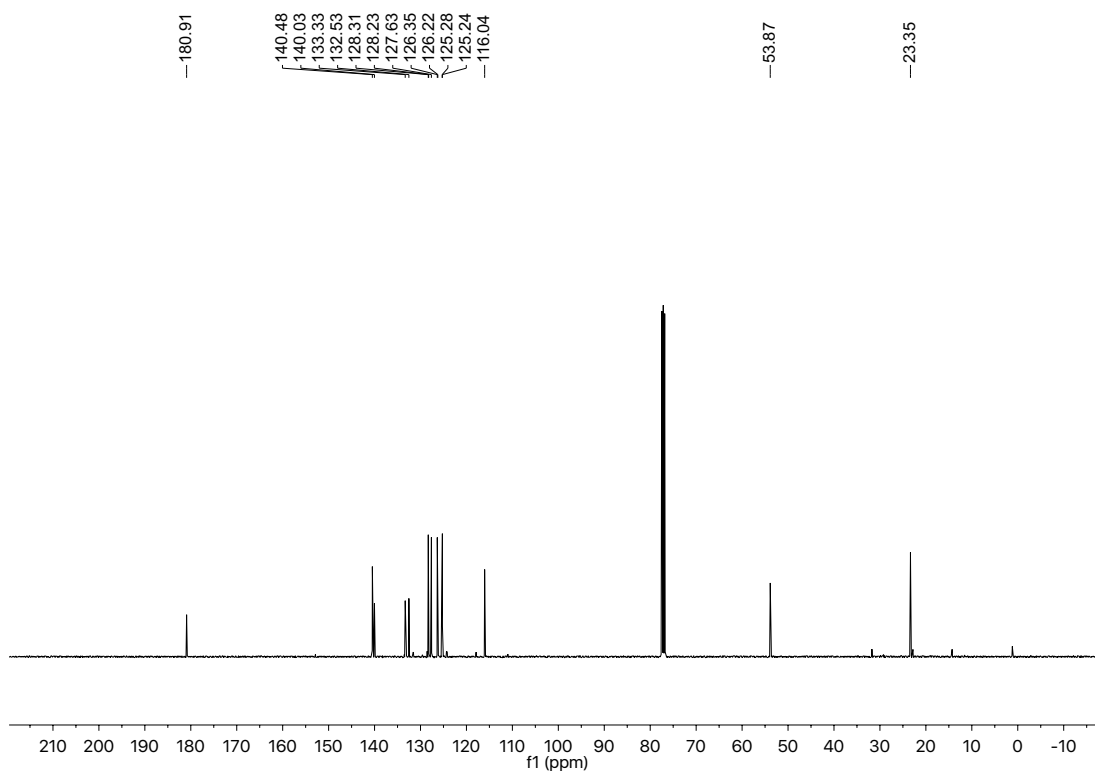

<sup>13</sup>C NMR (101 MHz, CDCl<sub>3</sub>) of compound **7i**.



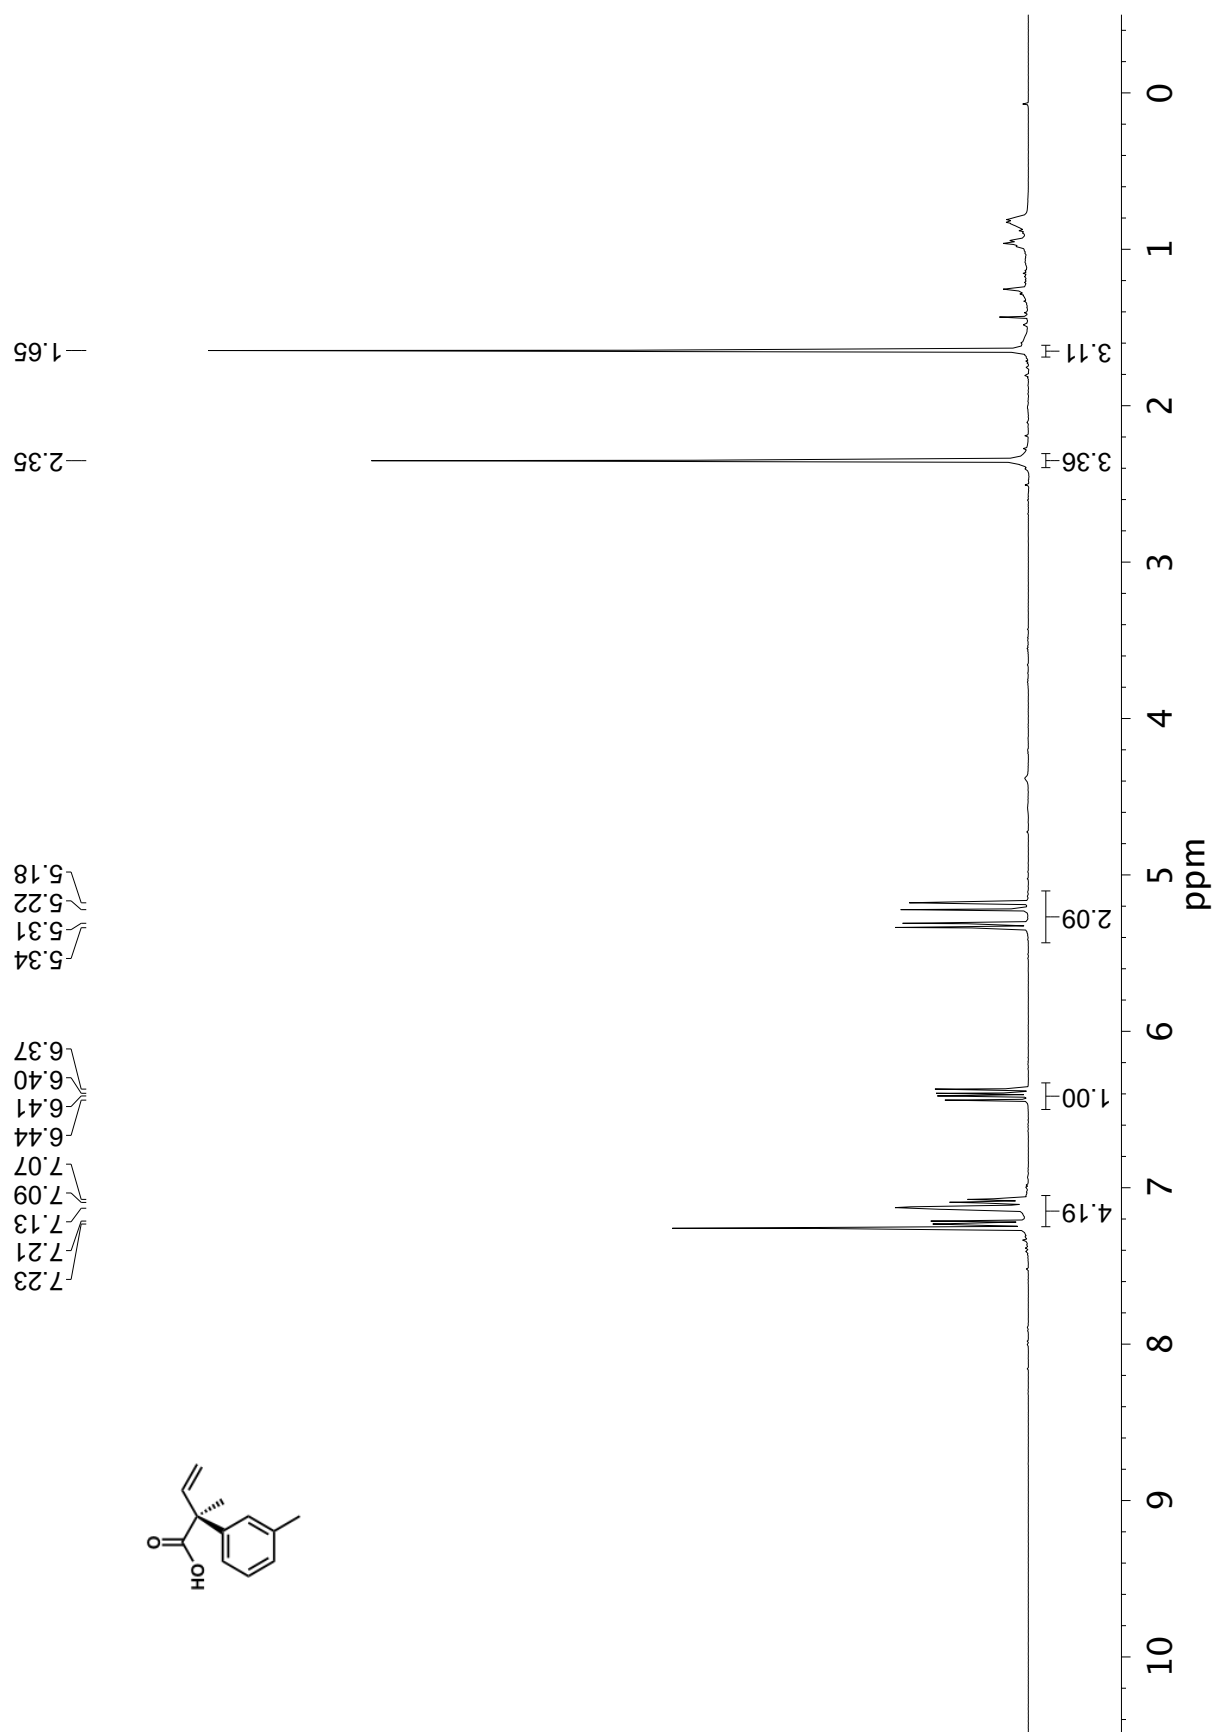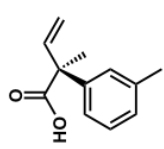

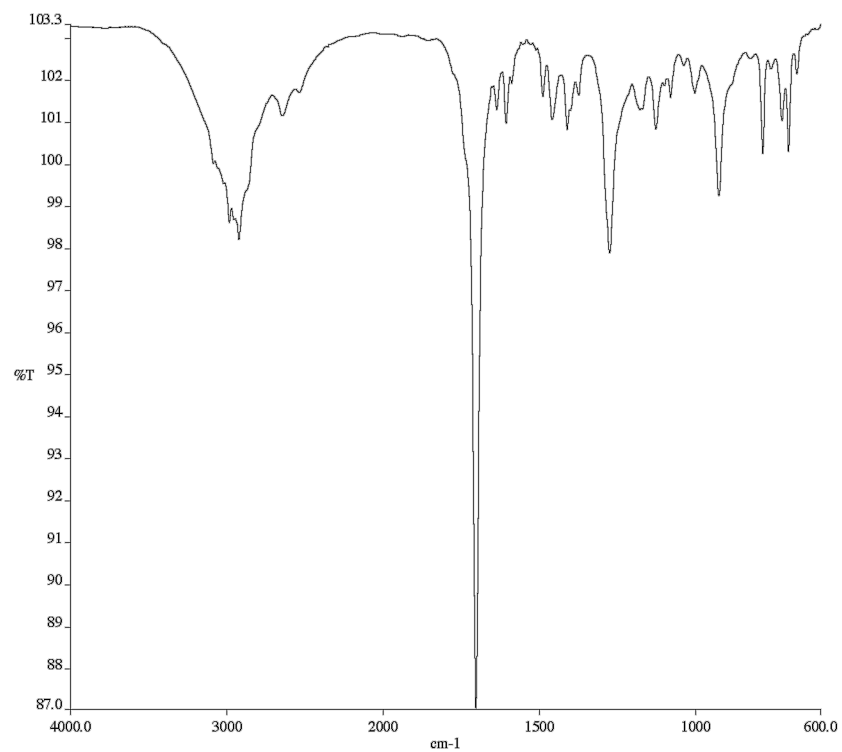

Infrared spectrum (Thin Film, NaCl) of compound **7j**.

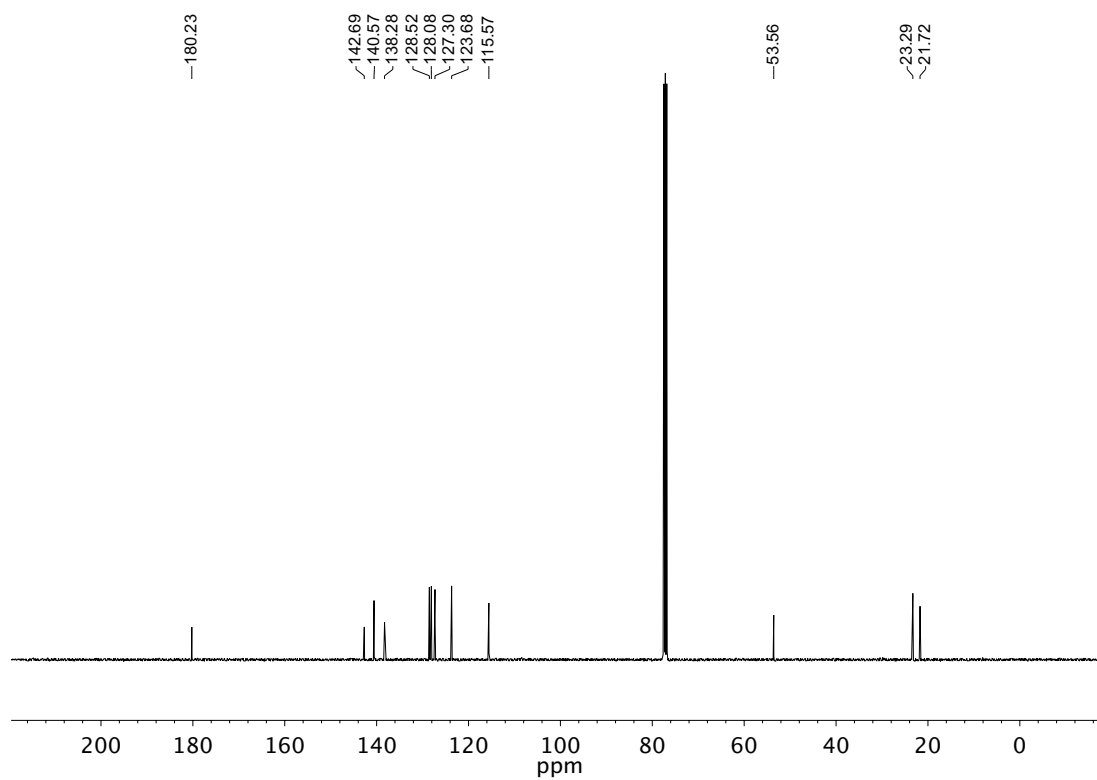

<sup>13</sup>C NMR (101 MHz, CDCl<sub>3</sub>) of compound **7j**.

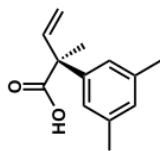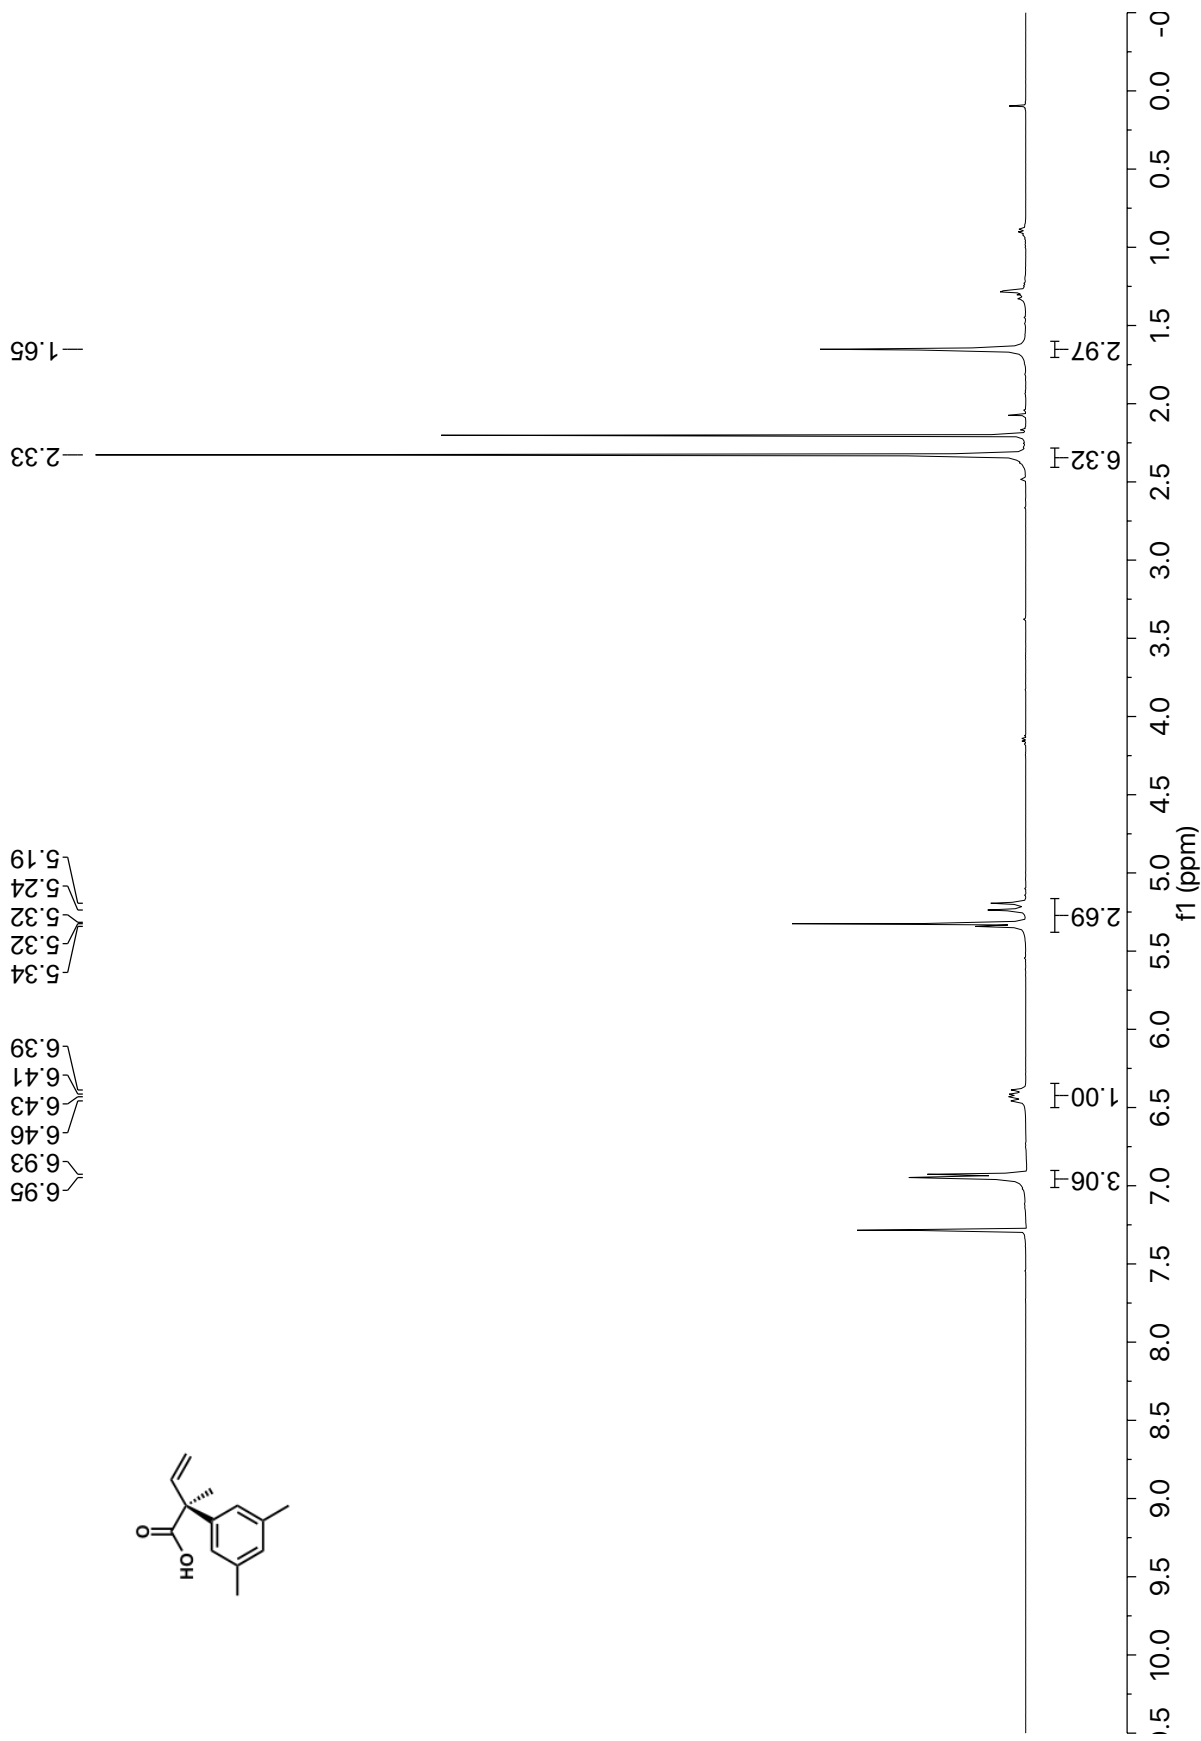

<sup>1</sup>H NMR (400 MHz, CDCl<sub>3</sub>) of compound 7k.

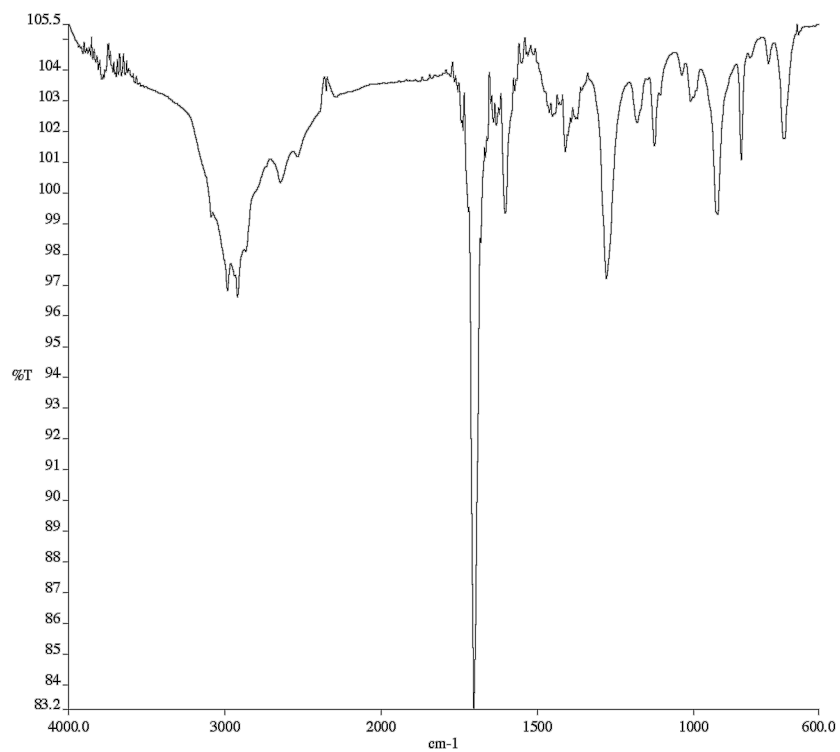

Infrared spectrum (Thin Film, NaCl) of compound **7k**.

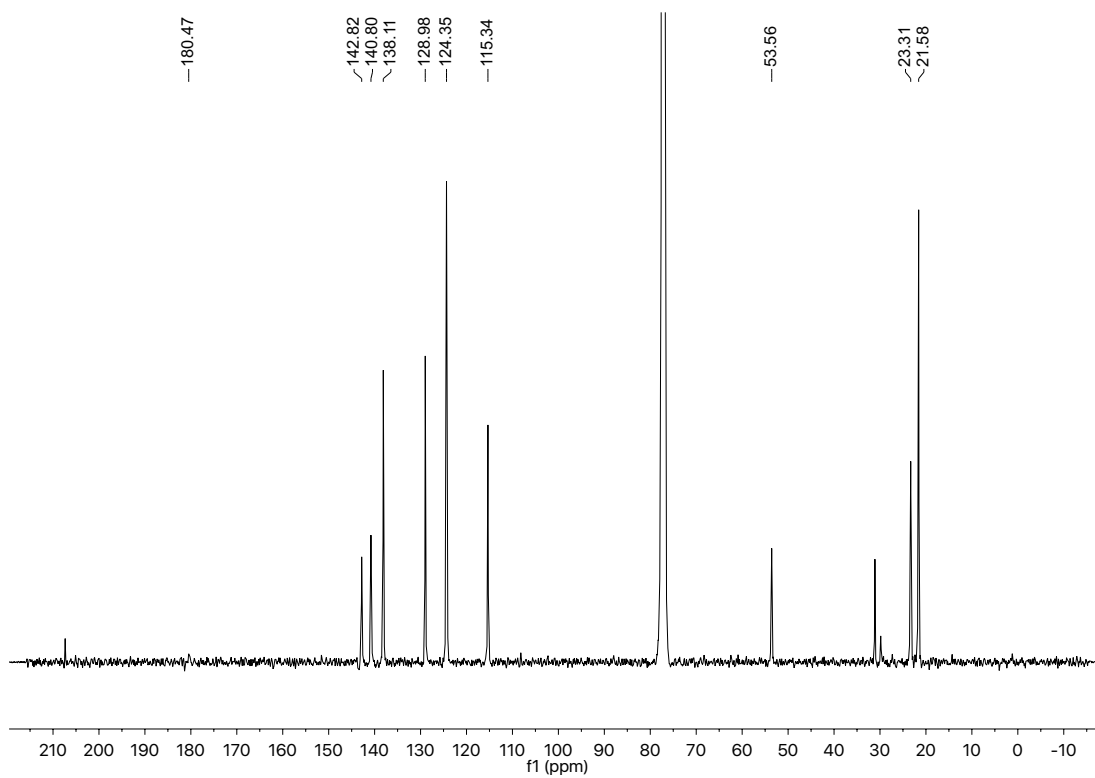

<sup>13</sup>C NMR (101 MHz, CDCl<sub>3</sub>) of compound **7k**.

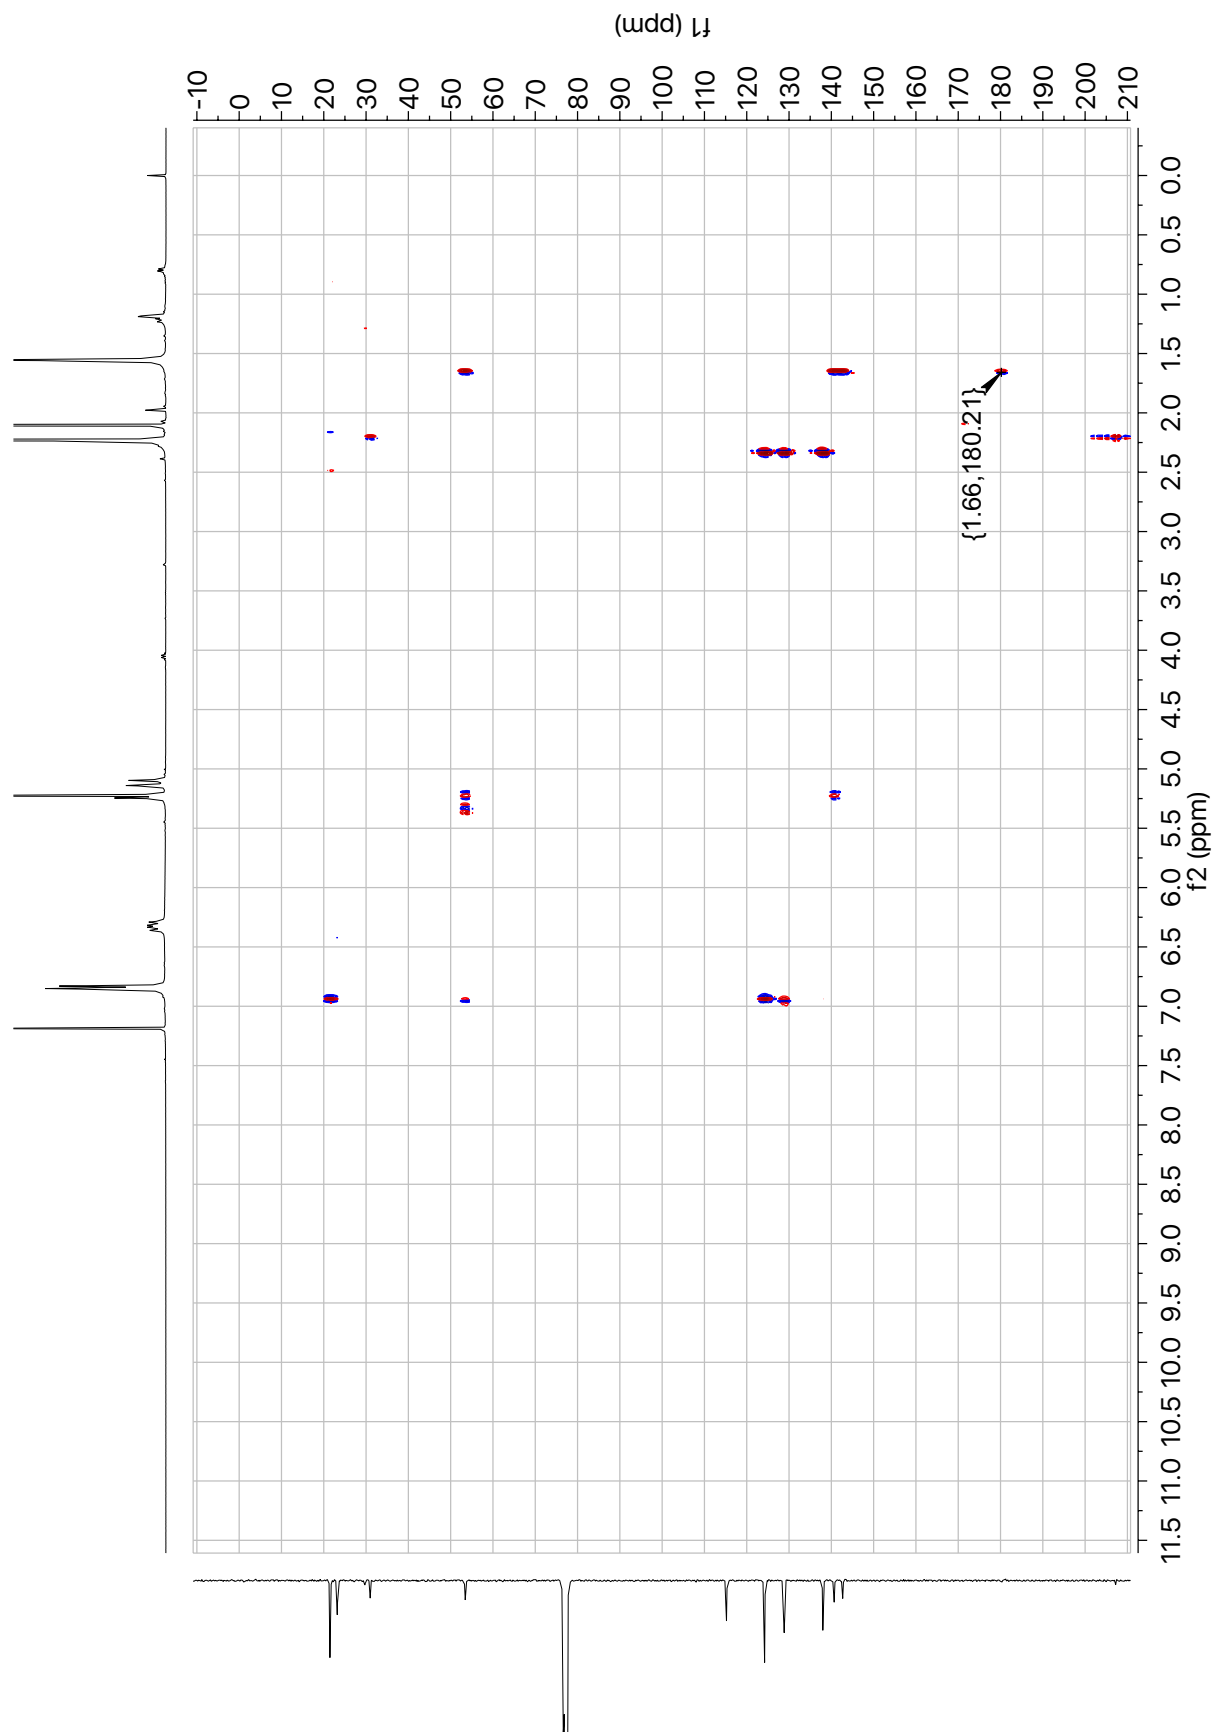

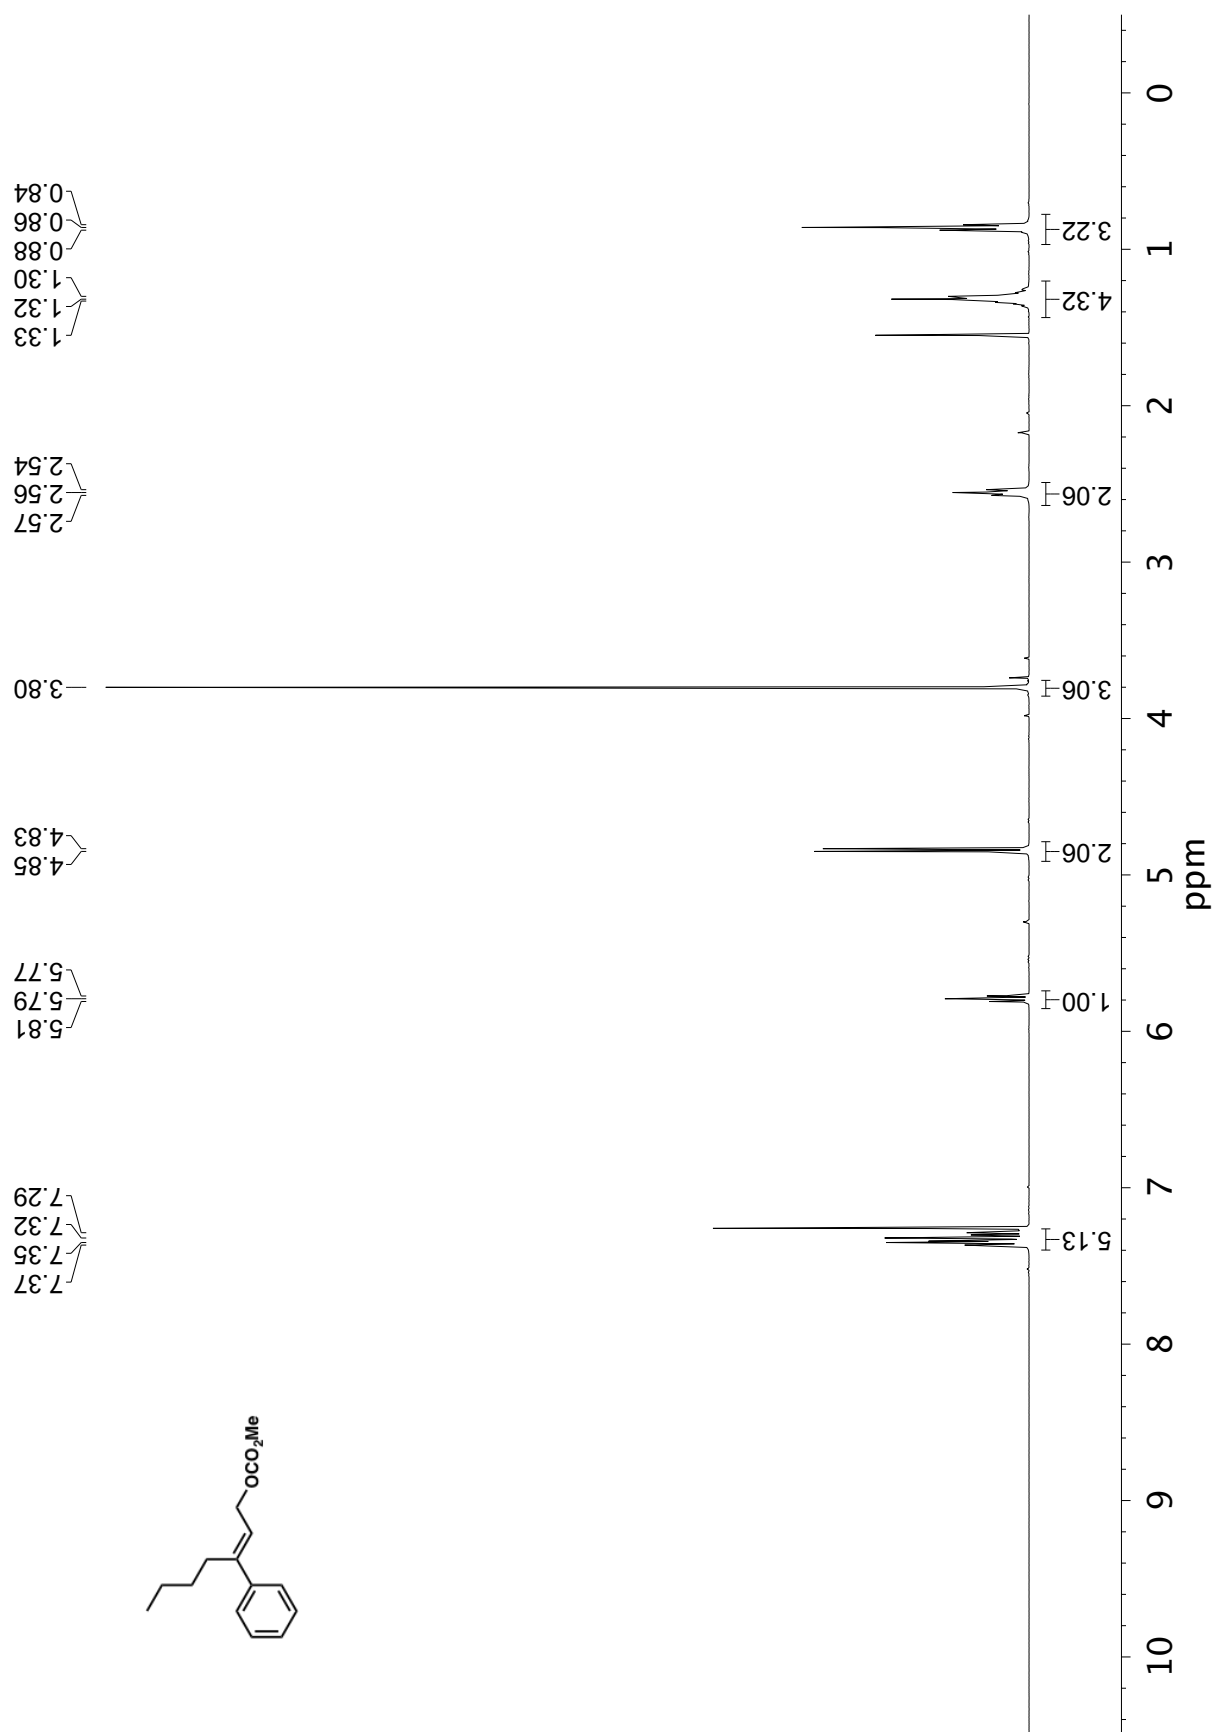

<sup>1</sup>H NMR (400 MHz, CDCl<sub>3</sub>) of compound **8b**.

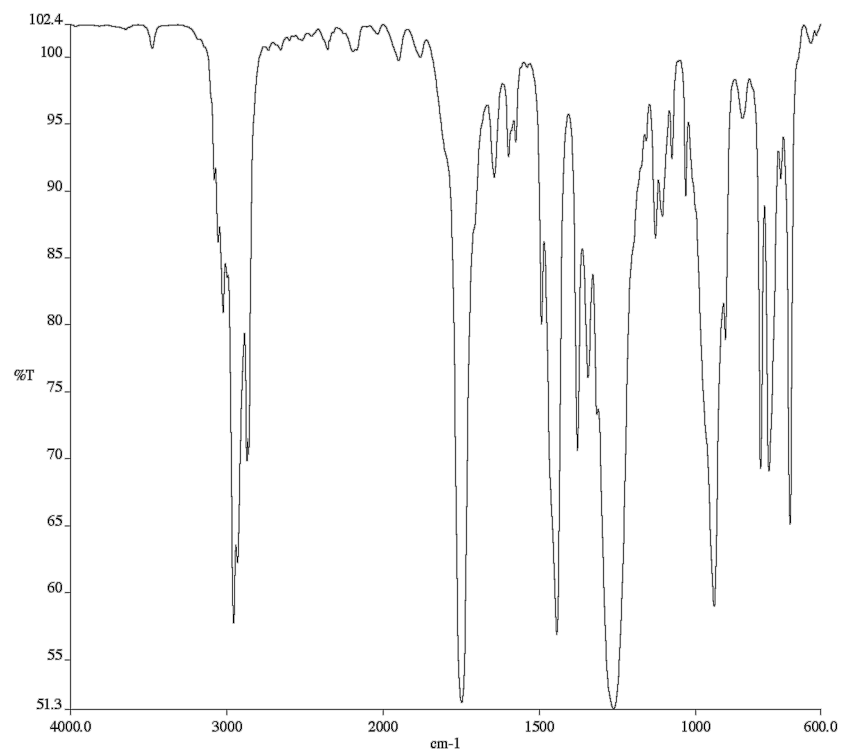

Infrared spectrum (Thin Film, NaCl) of compound **8b**.

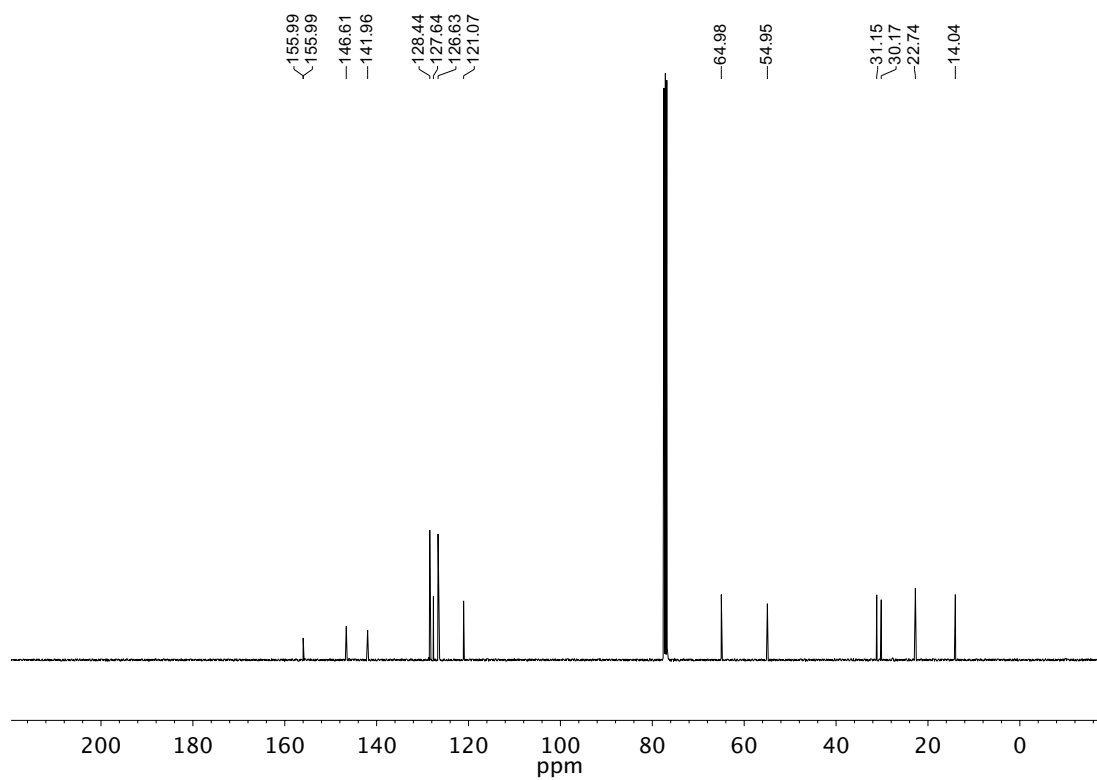

<sup>13</sup>C NMR (101 MHz, CDCl<sub>3</sub>) of compound **8b**.

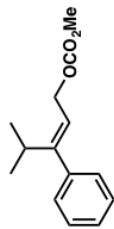

1.04  
1.02

2.62  
2.62  
2.62  
2.60  
2.60  
2.59  
2.58

3.75

4.47  
4.46  
4.45  
4.45

5.63  
5.61  
5.59

7.35  
7.31  
7.27  
7.09  
7.07

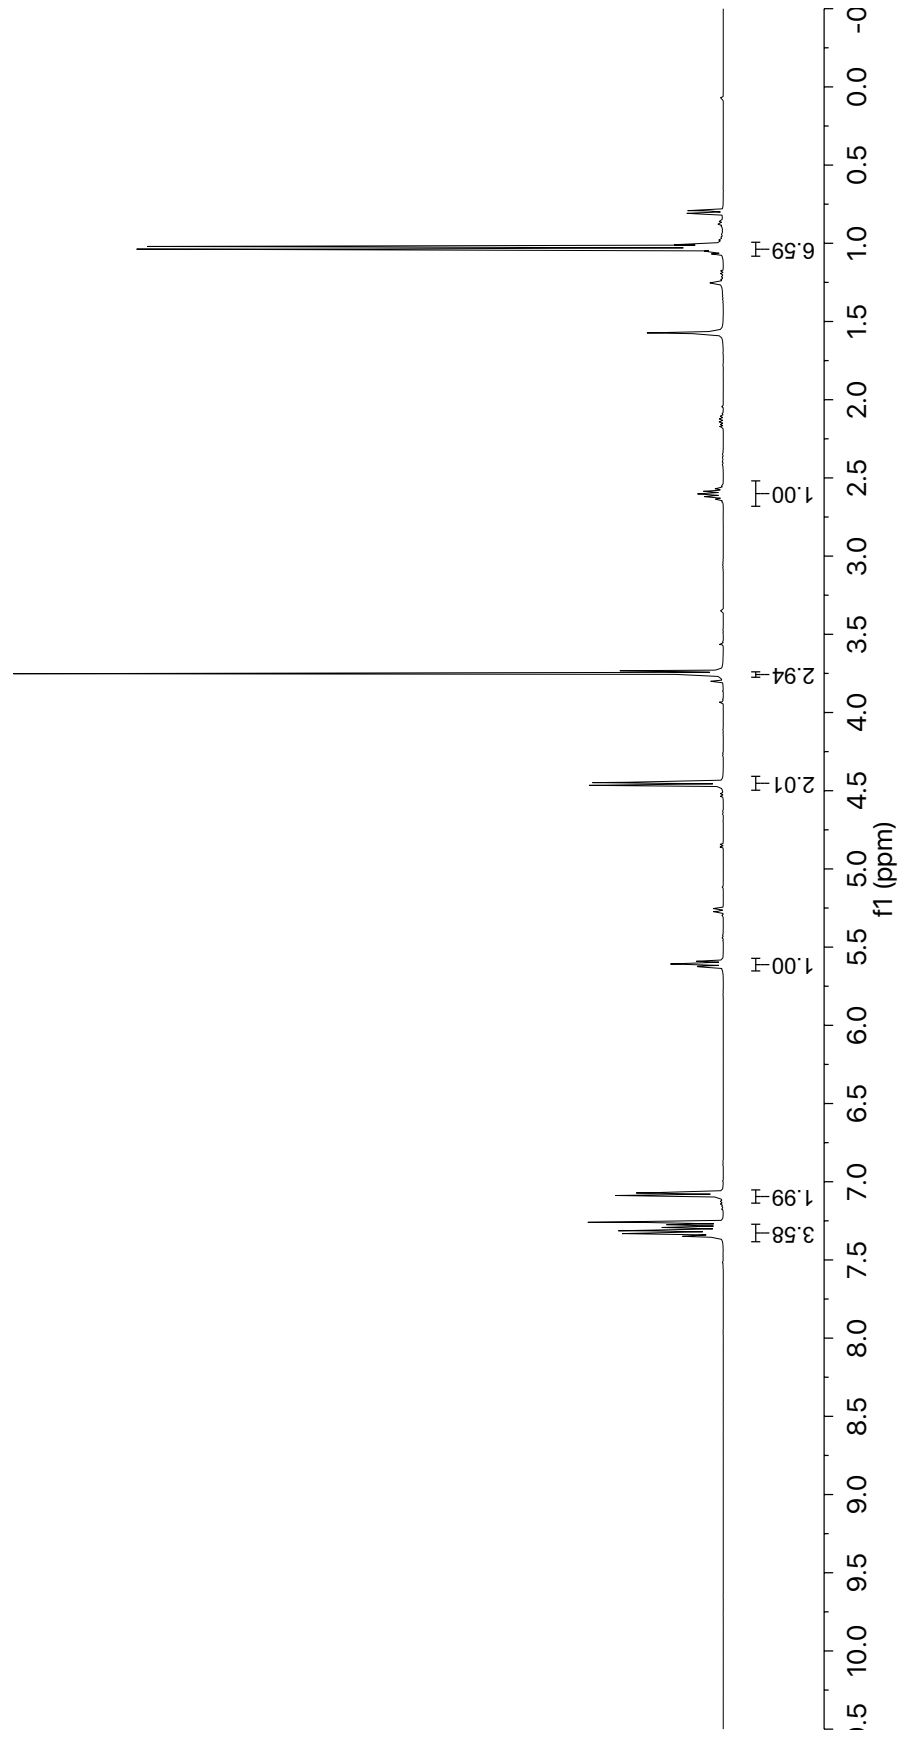

<sup>1</sup>H NMR (400 MHz, CDCl<sub>3</sub>) of compound **8c**.



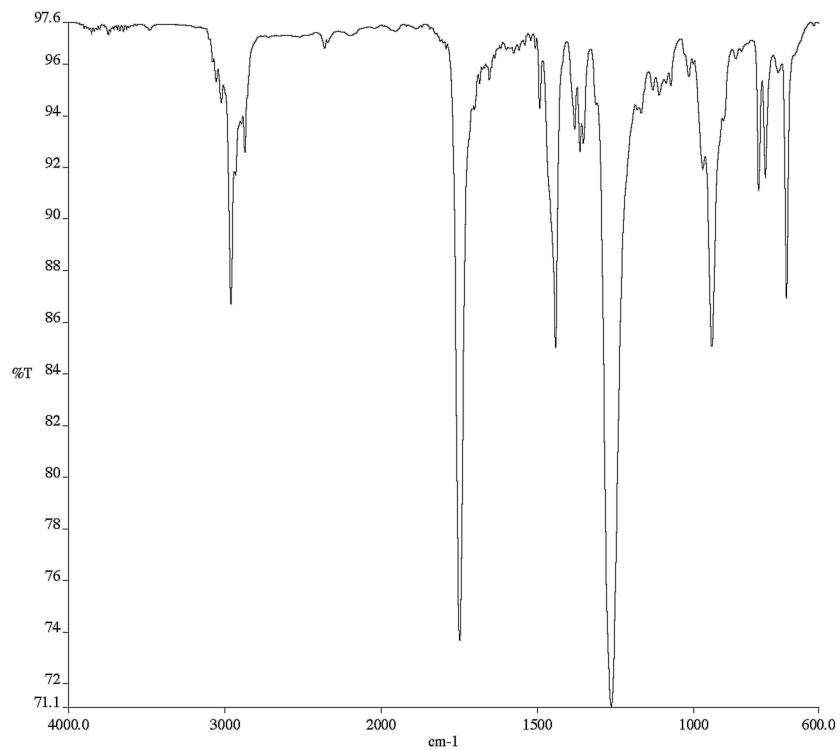

Infrared spectrum (Thin Film, NaCl) of compound **8c**.

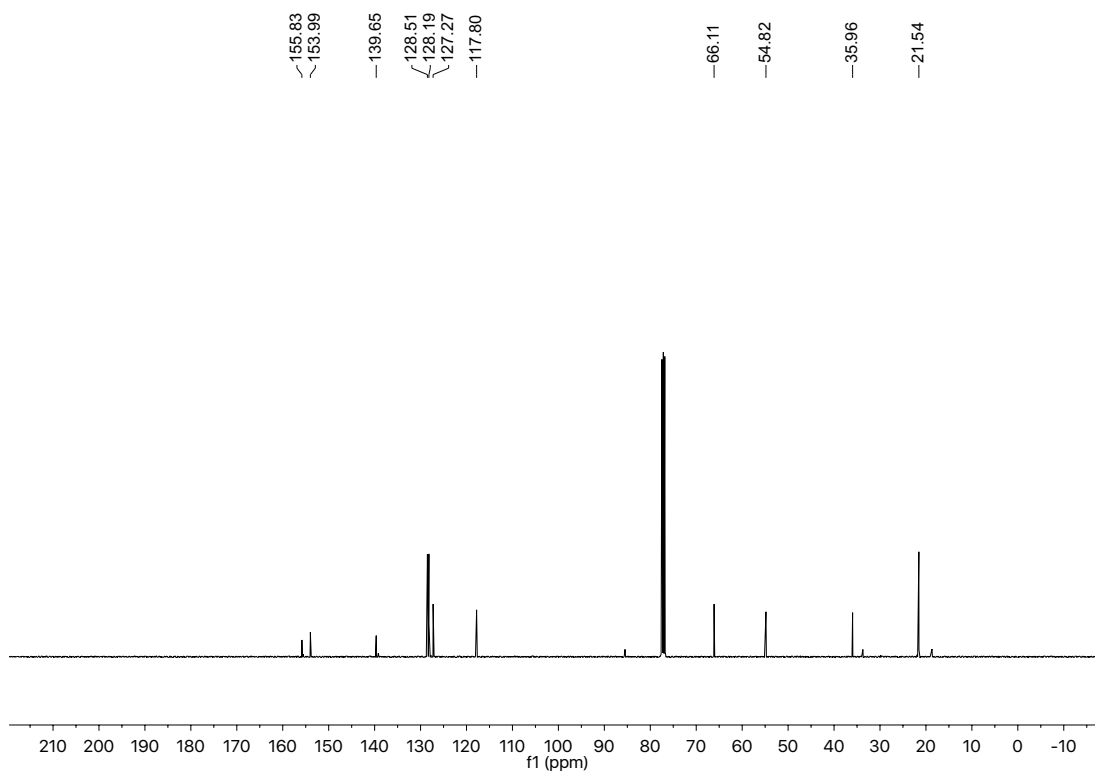

<sup>13</sup>C NMR (101 MHz, CDCl<sub>3</sub>) of compound **8c**.

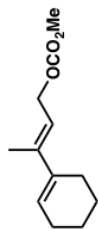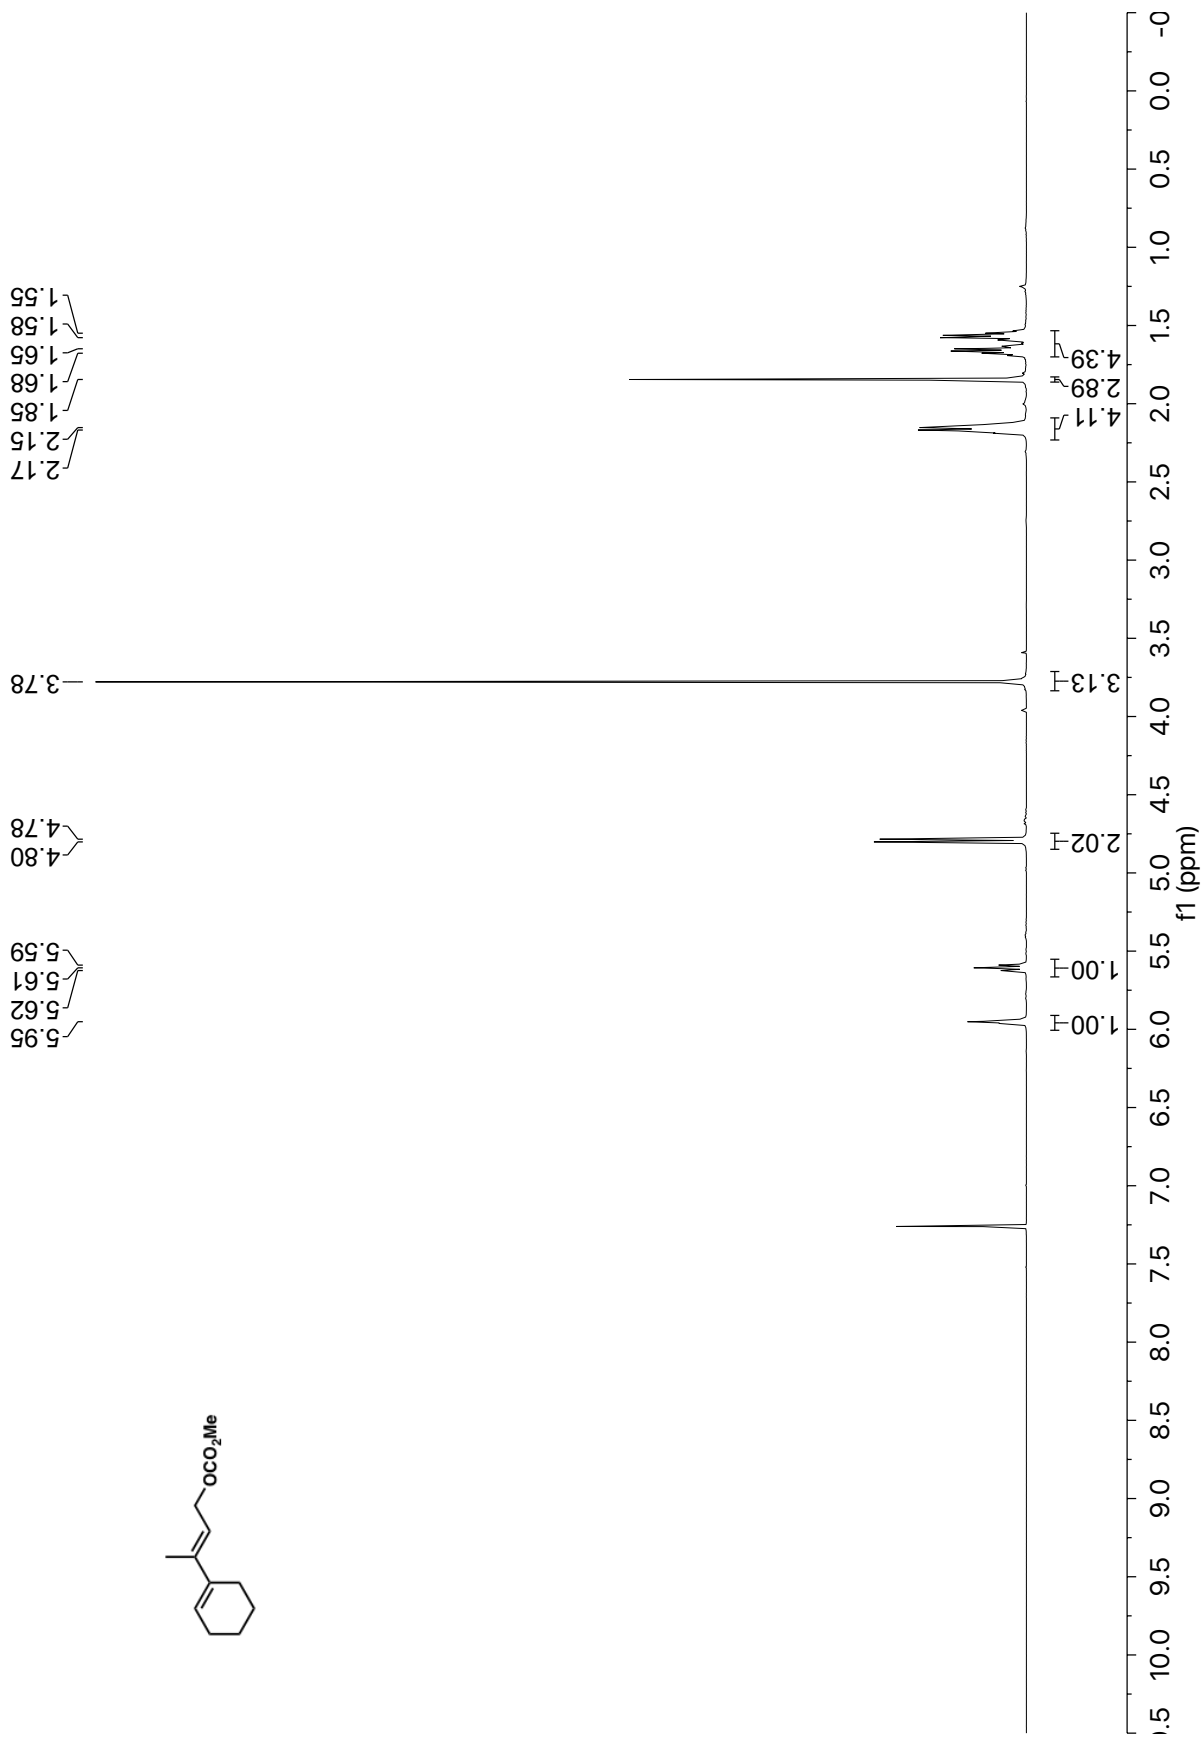

<sup>1</sup>H NMR (400 MHz, CDCl<sub>3</sub>) of compound **8c**.

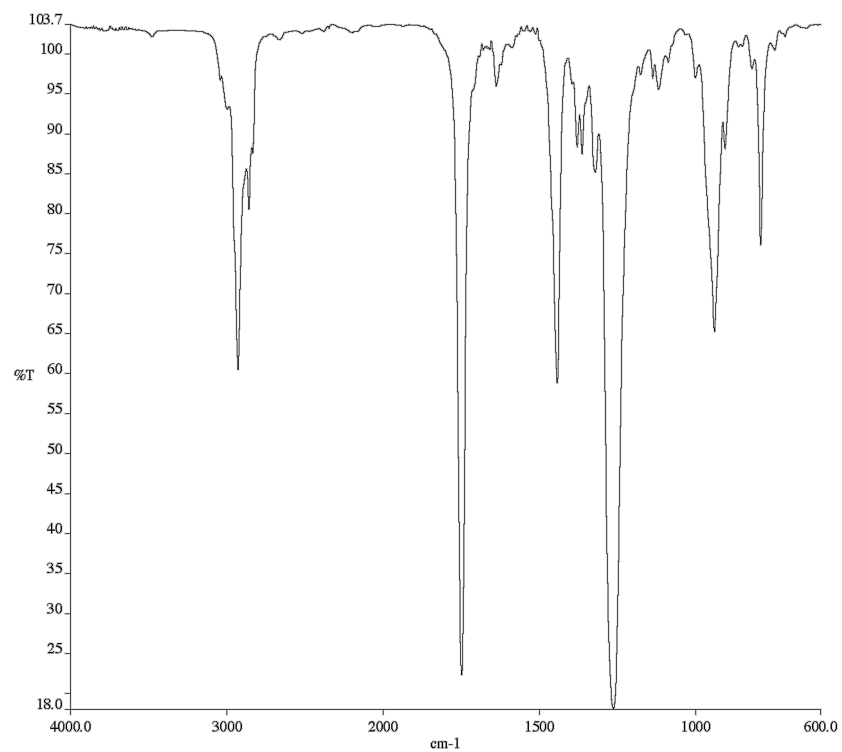

Infrared spectrum (Thin Film, NaCl) of compound **8e**.

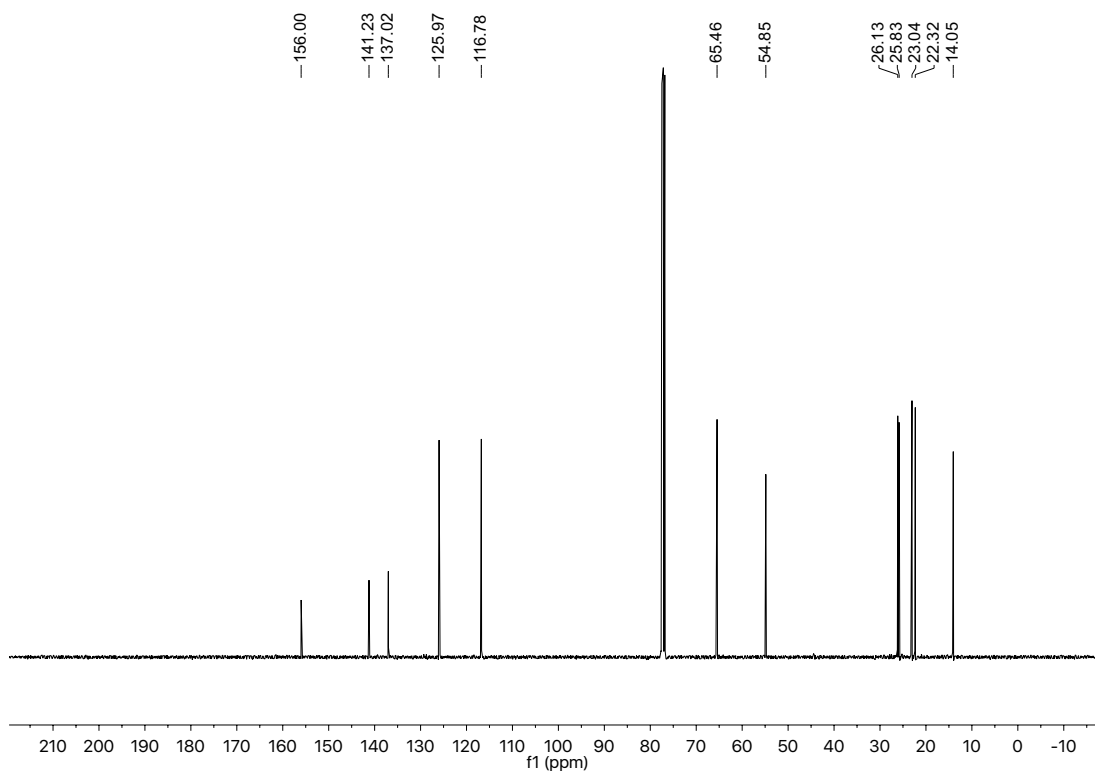

$^{13}\text{C}$  NMR (101 MHz,  $\text{CDCl}_3$ ) of compound **8e**.

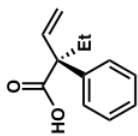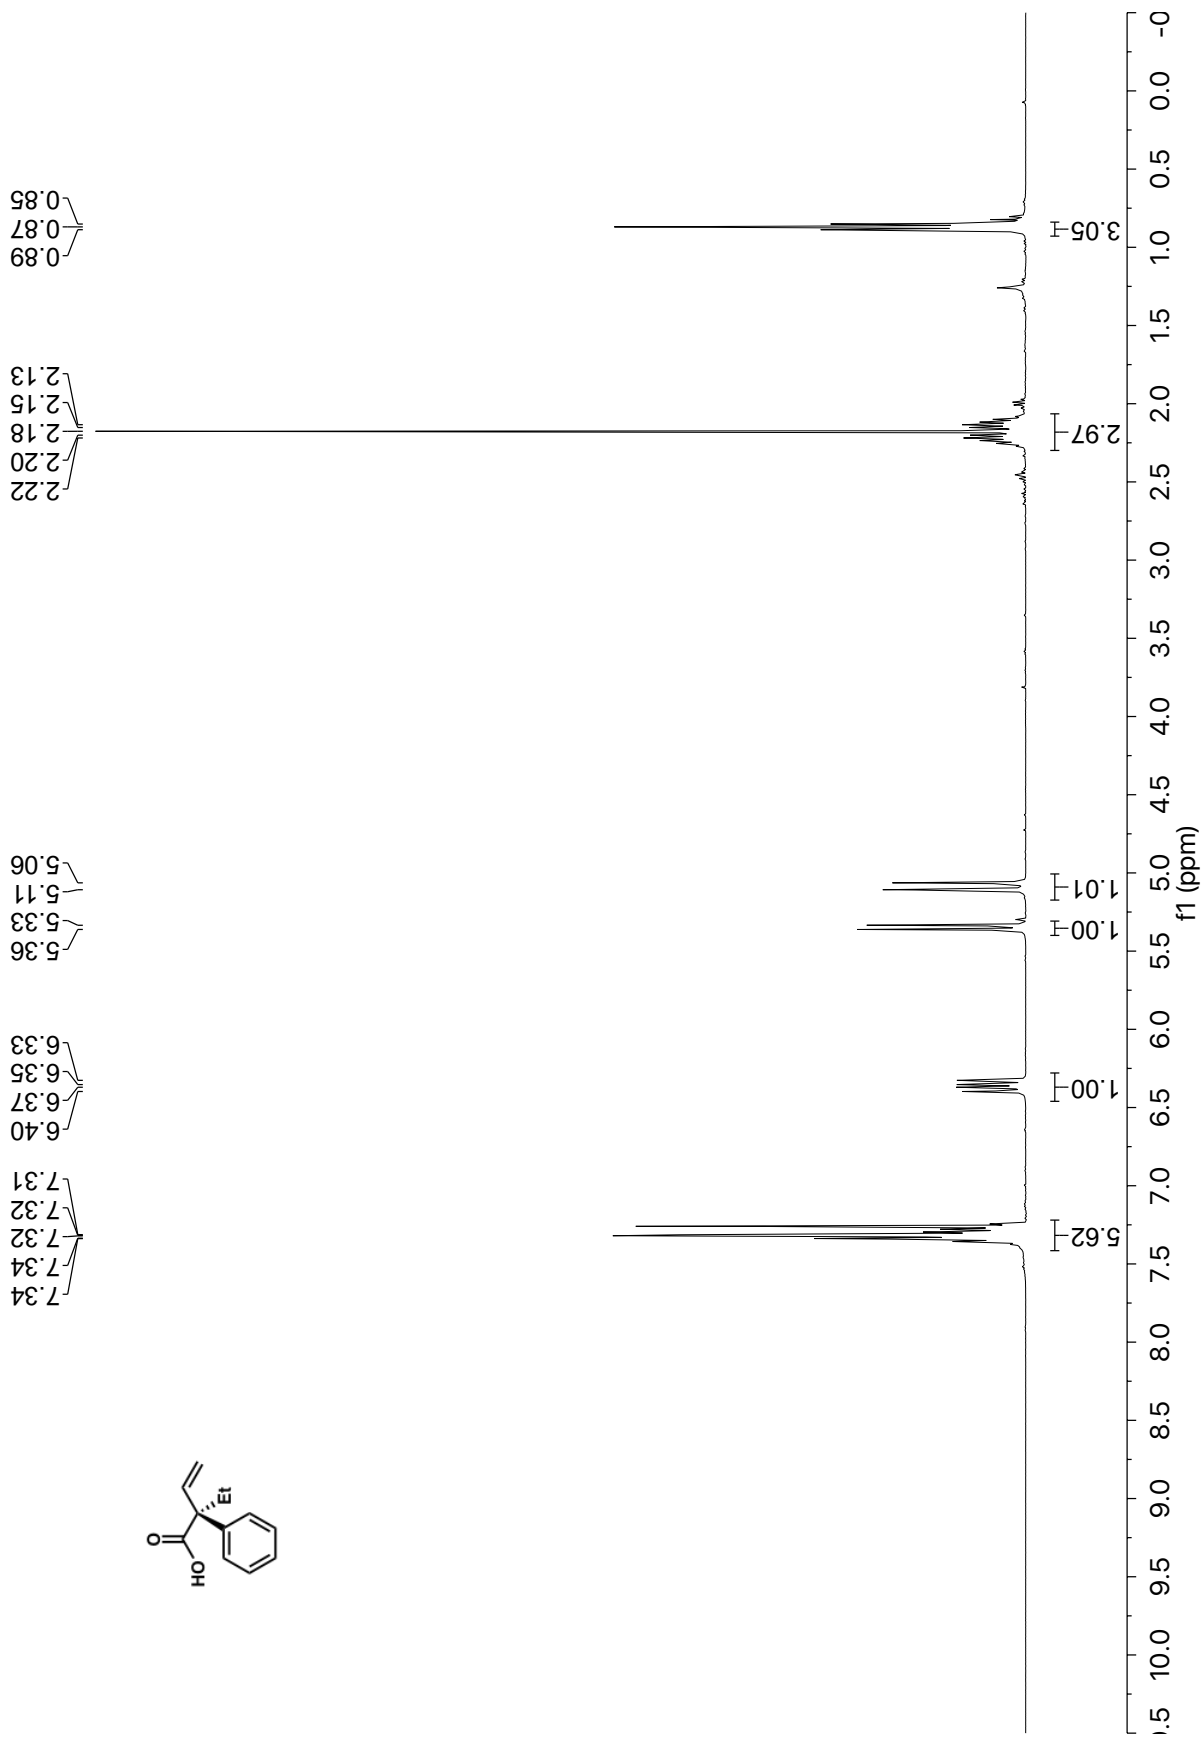

<sup>1</sup>H NMR (400 MHz, CDCl<sub>3</sub>) of compound 9a.

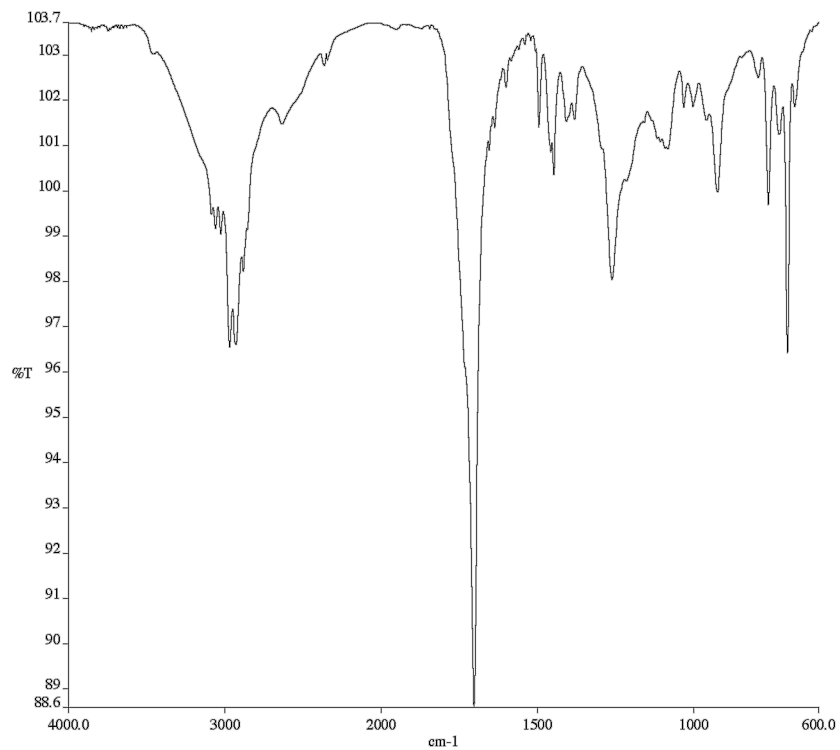

Infrared spectrum (Thin Film, NaCl) of compound **9a**.

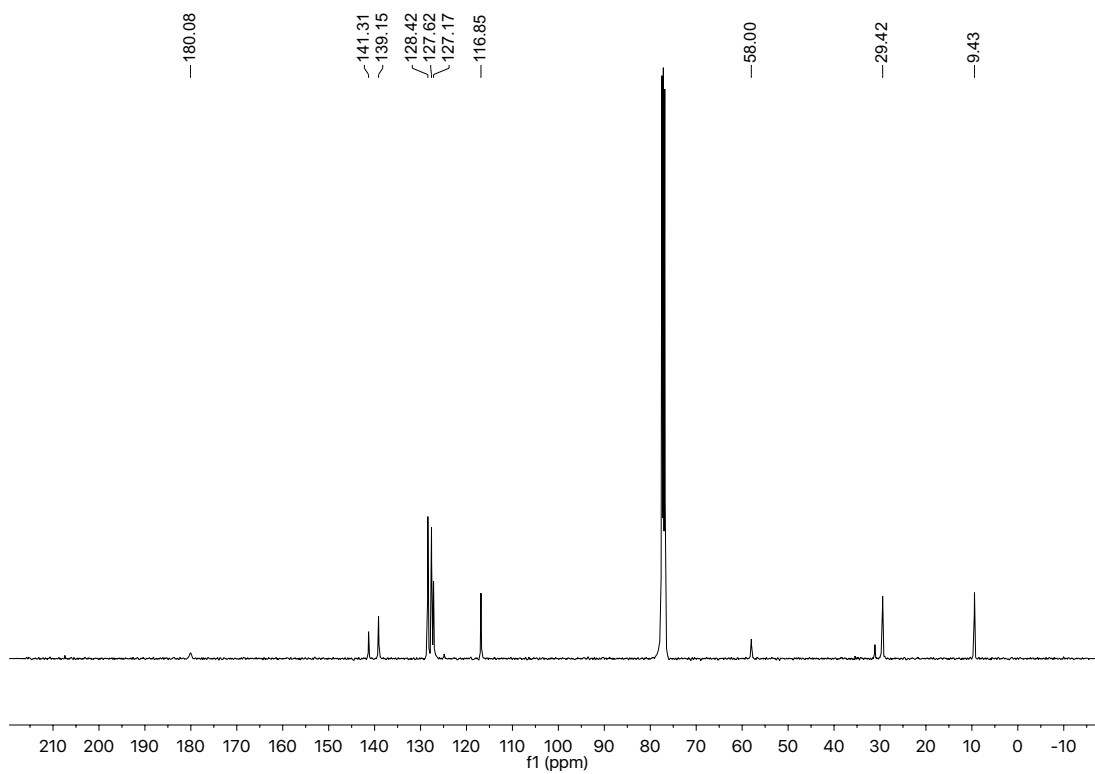

<sup>13</sup>C NMR (101 MHz, CDCl<sub>3</sub>) of compound **9a**.

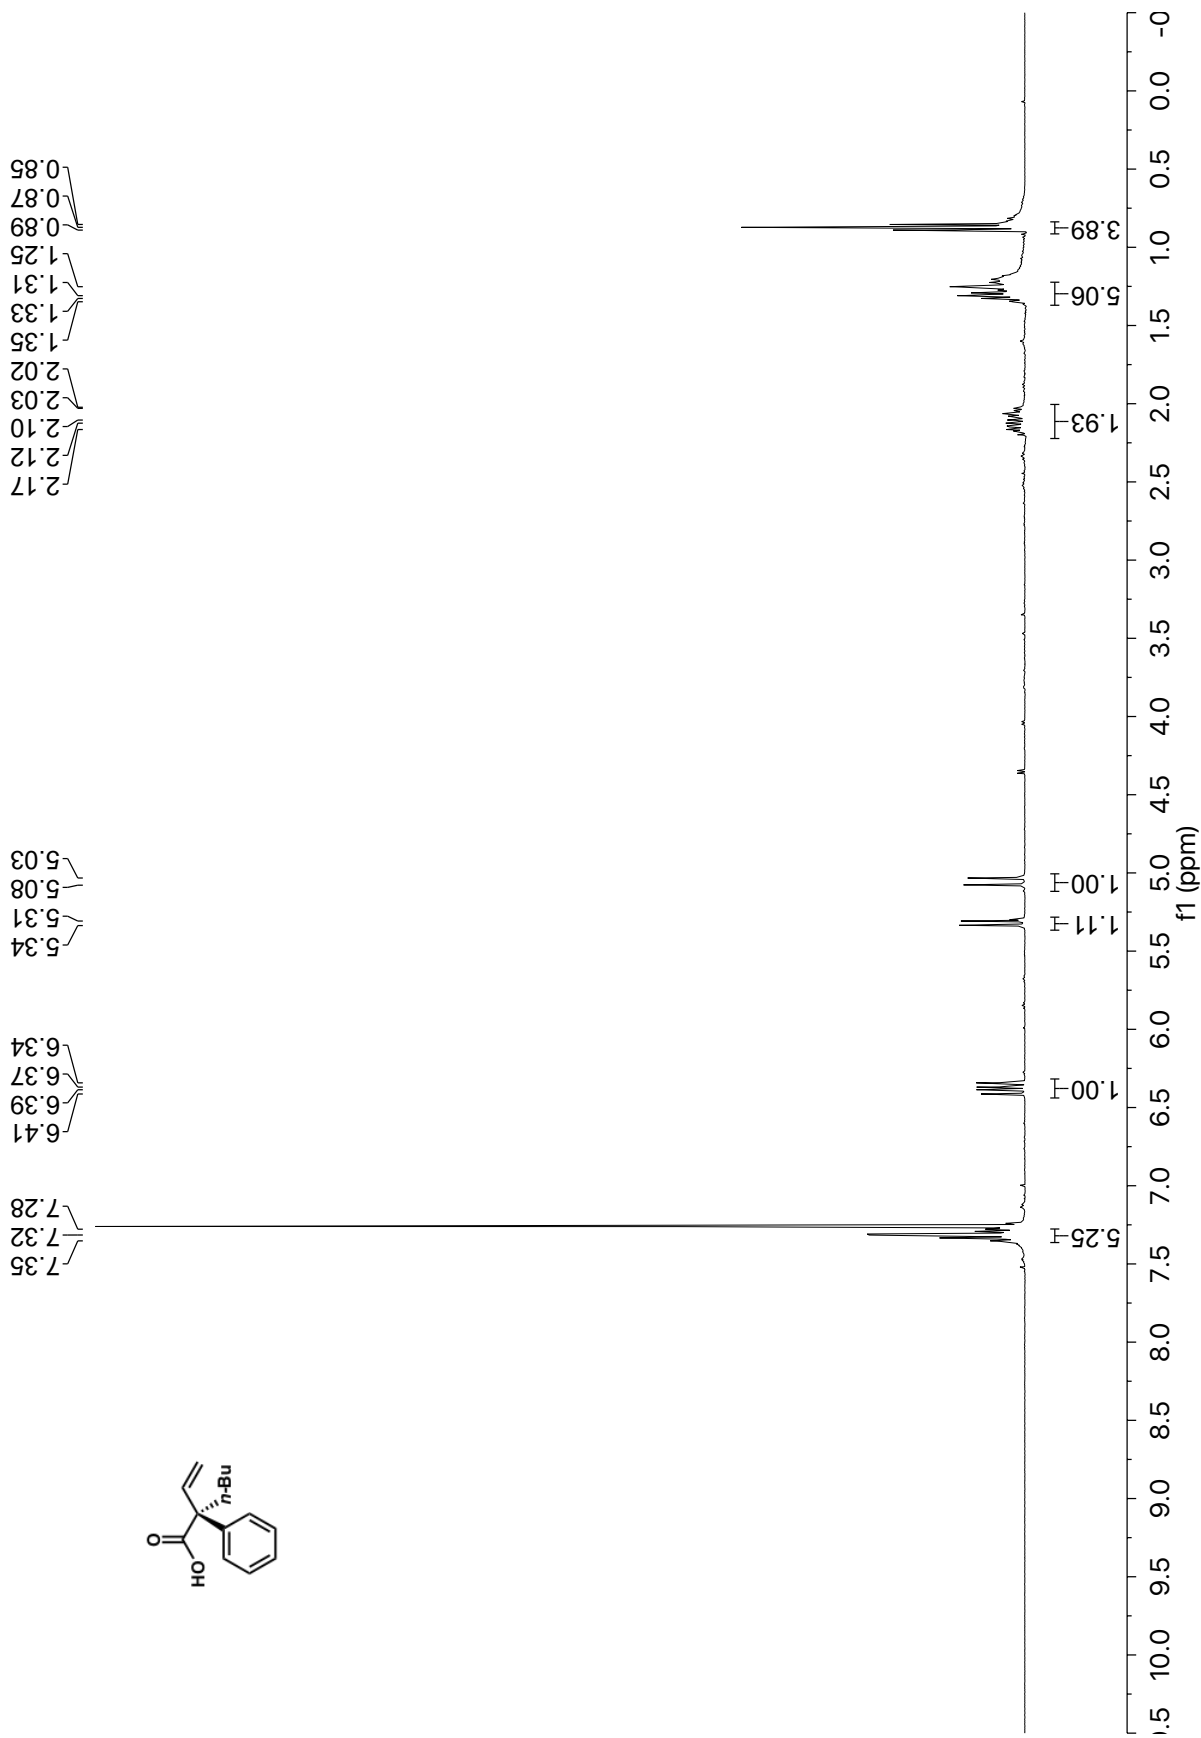

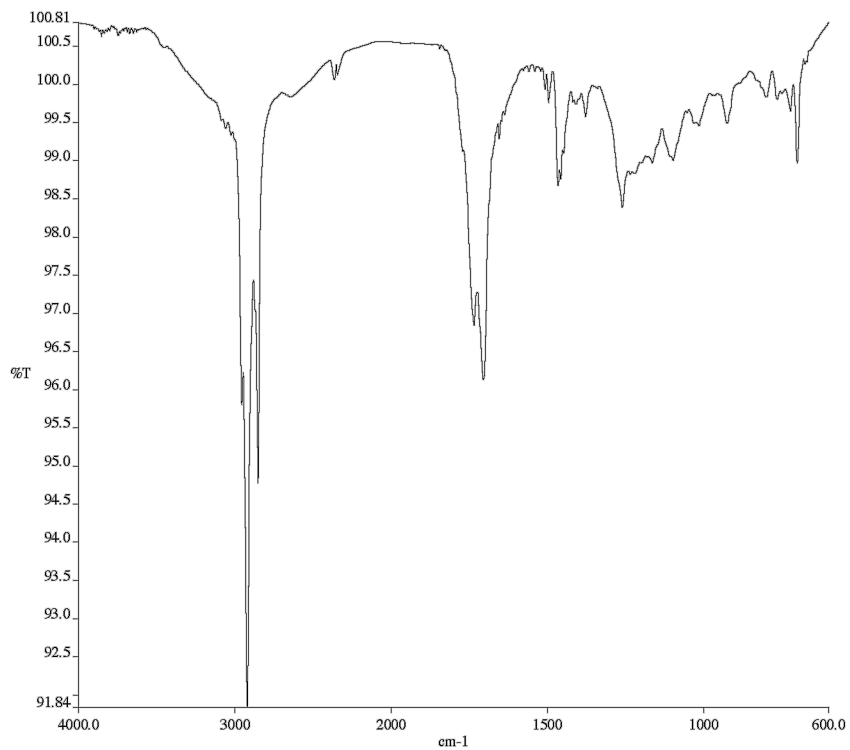

Infrared spectrum (Thin Film, NaCl) of compound **9b**.

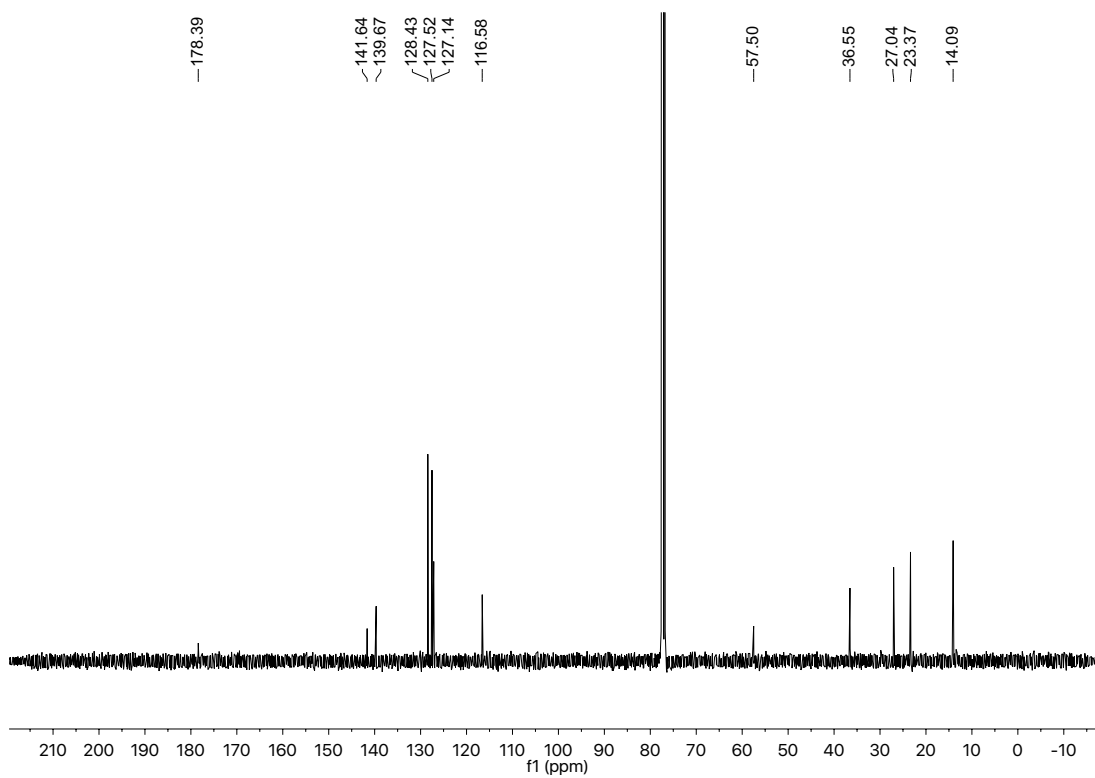

<sup>13</sup>C NMR (101 MHz, CDCl<sub>3</sub>) of compound **9b**.

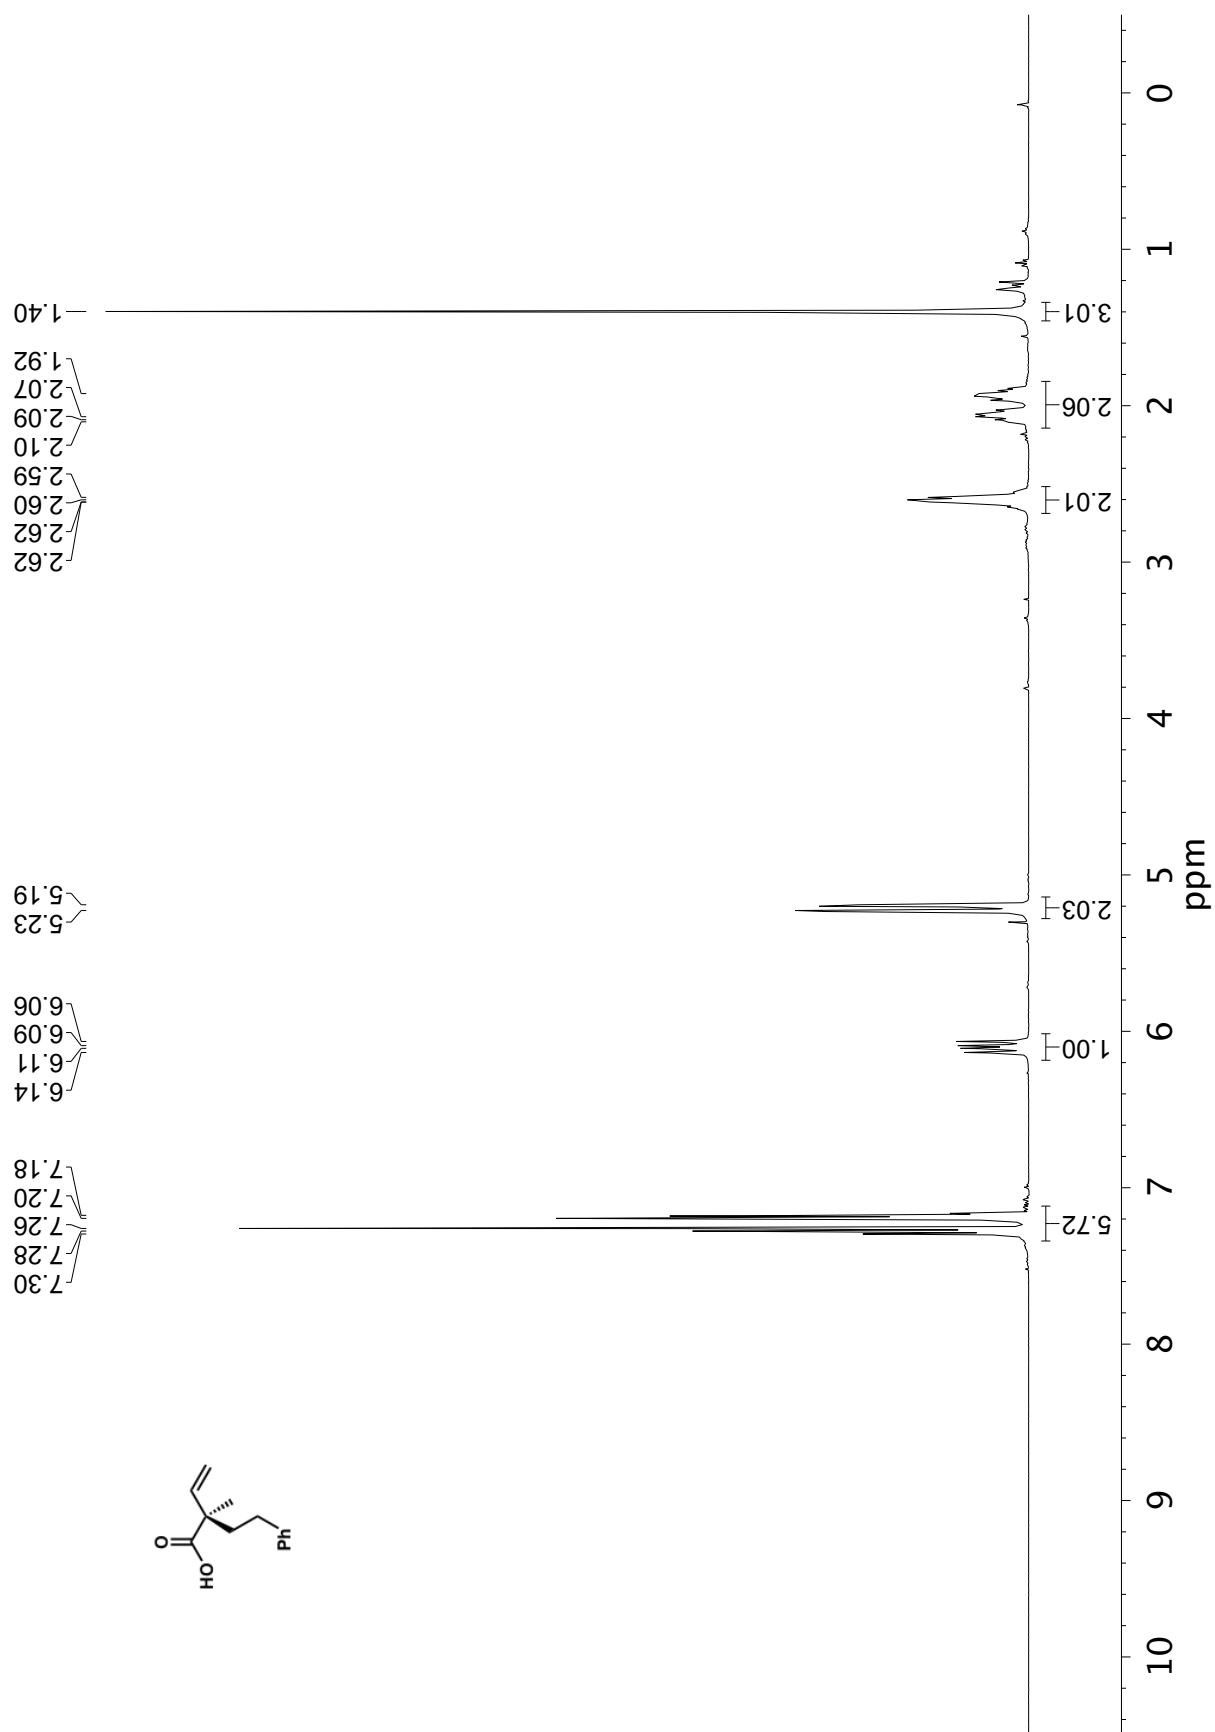



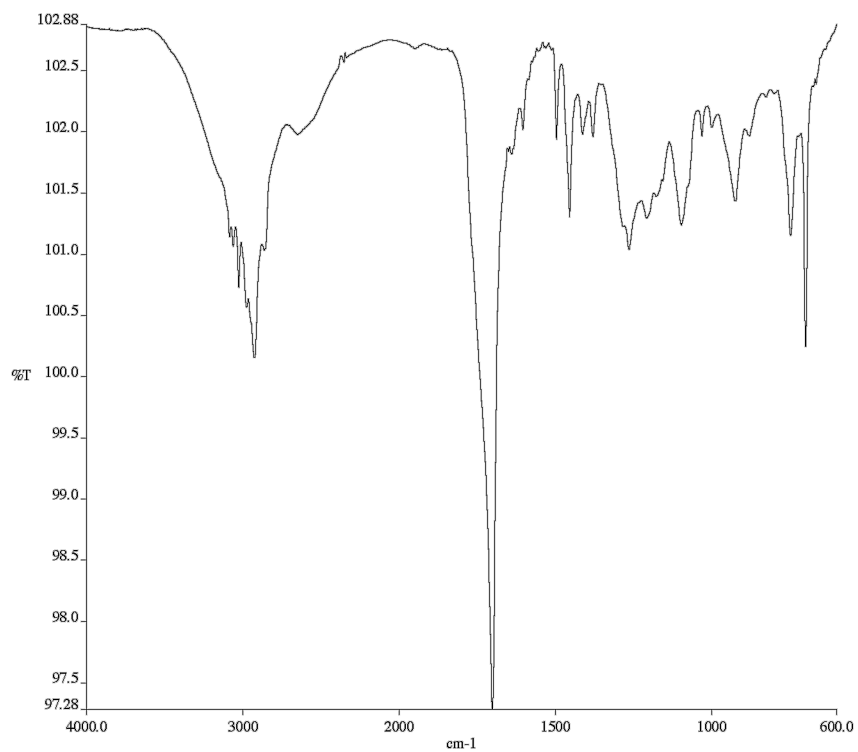

Infrared spectrum (Thin Film, NaCl) of compound **9f**.

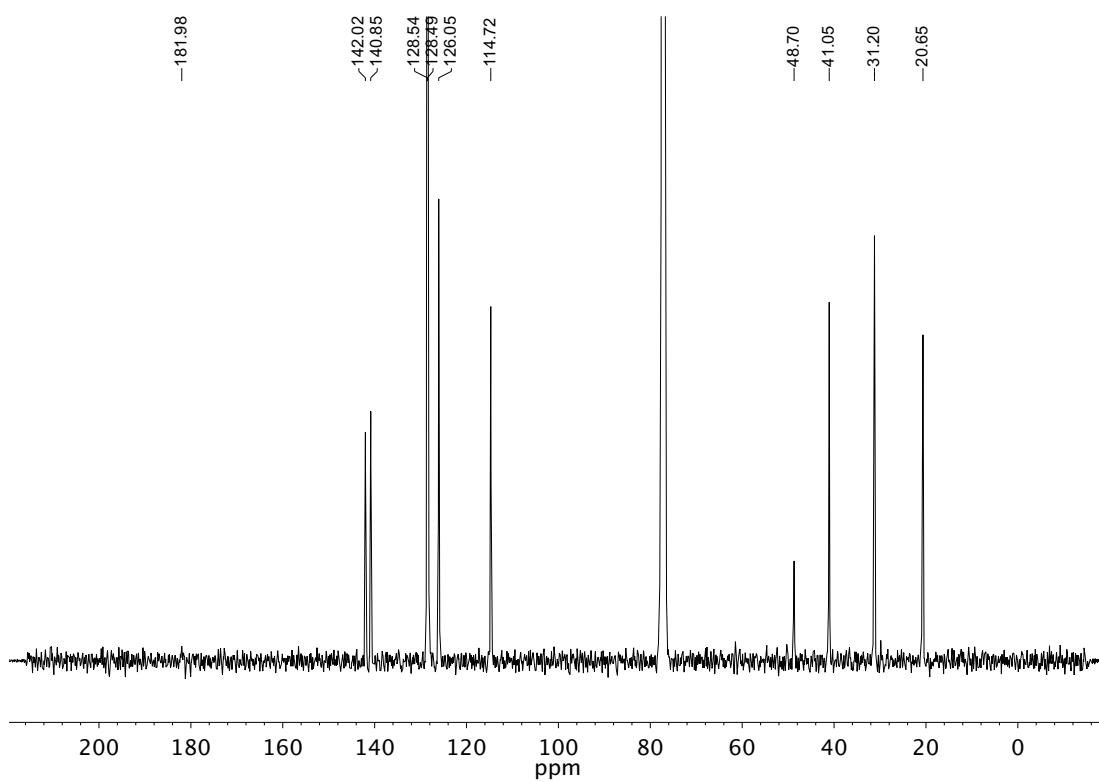

<sup>13</sup>C NMR (101 MHz, CDCl<sub>3</sub>) of compound **9f**.

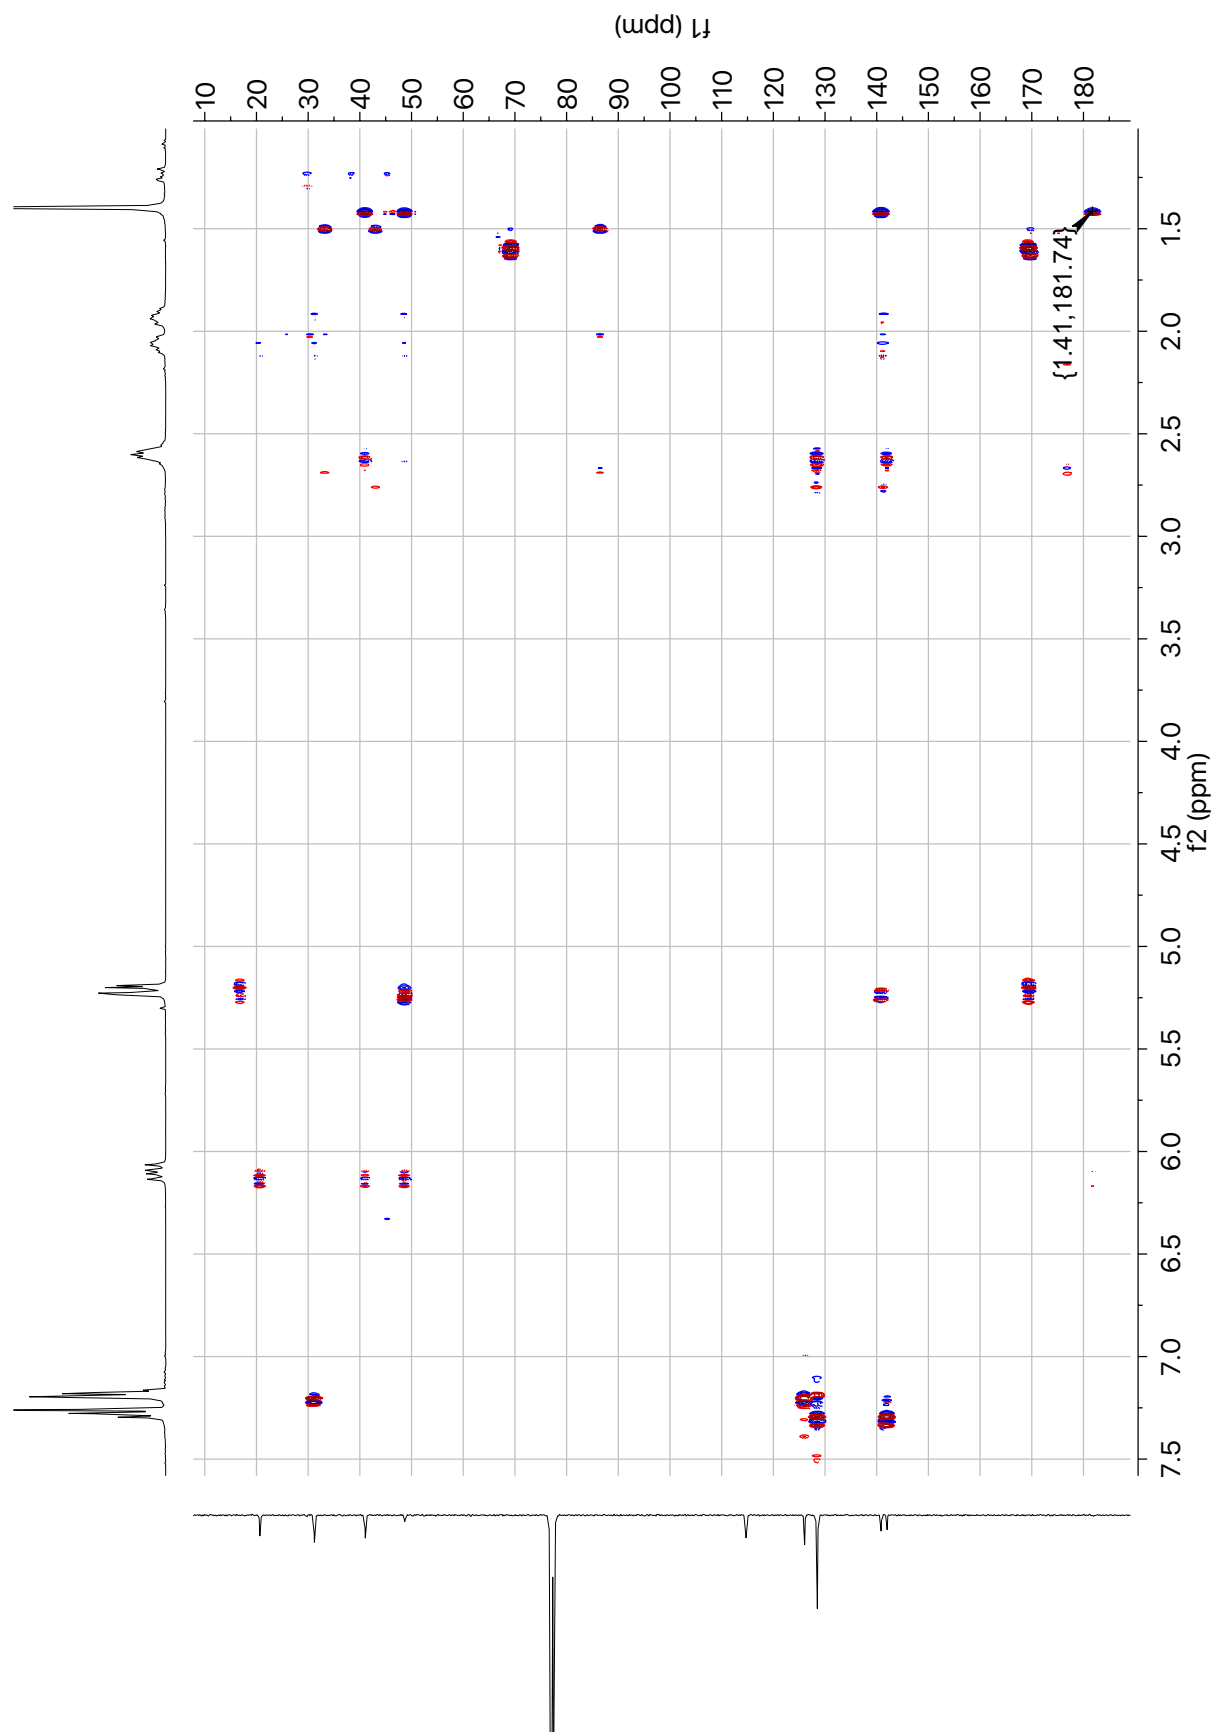

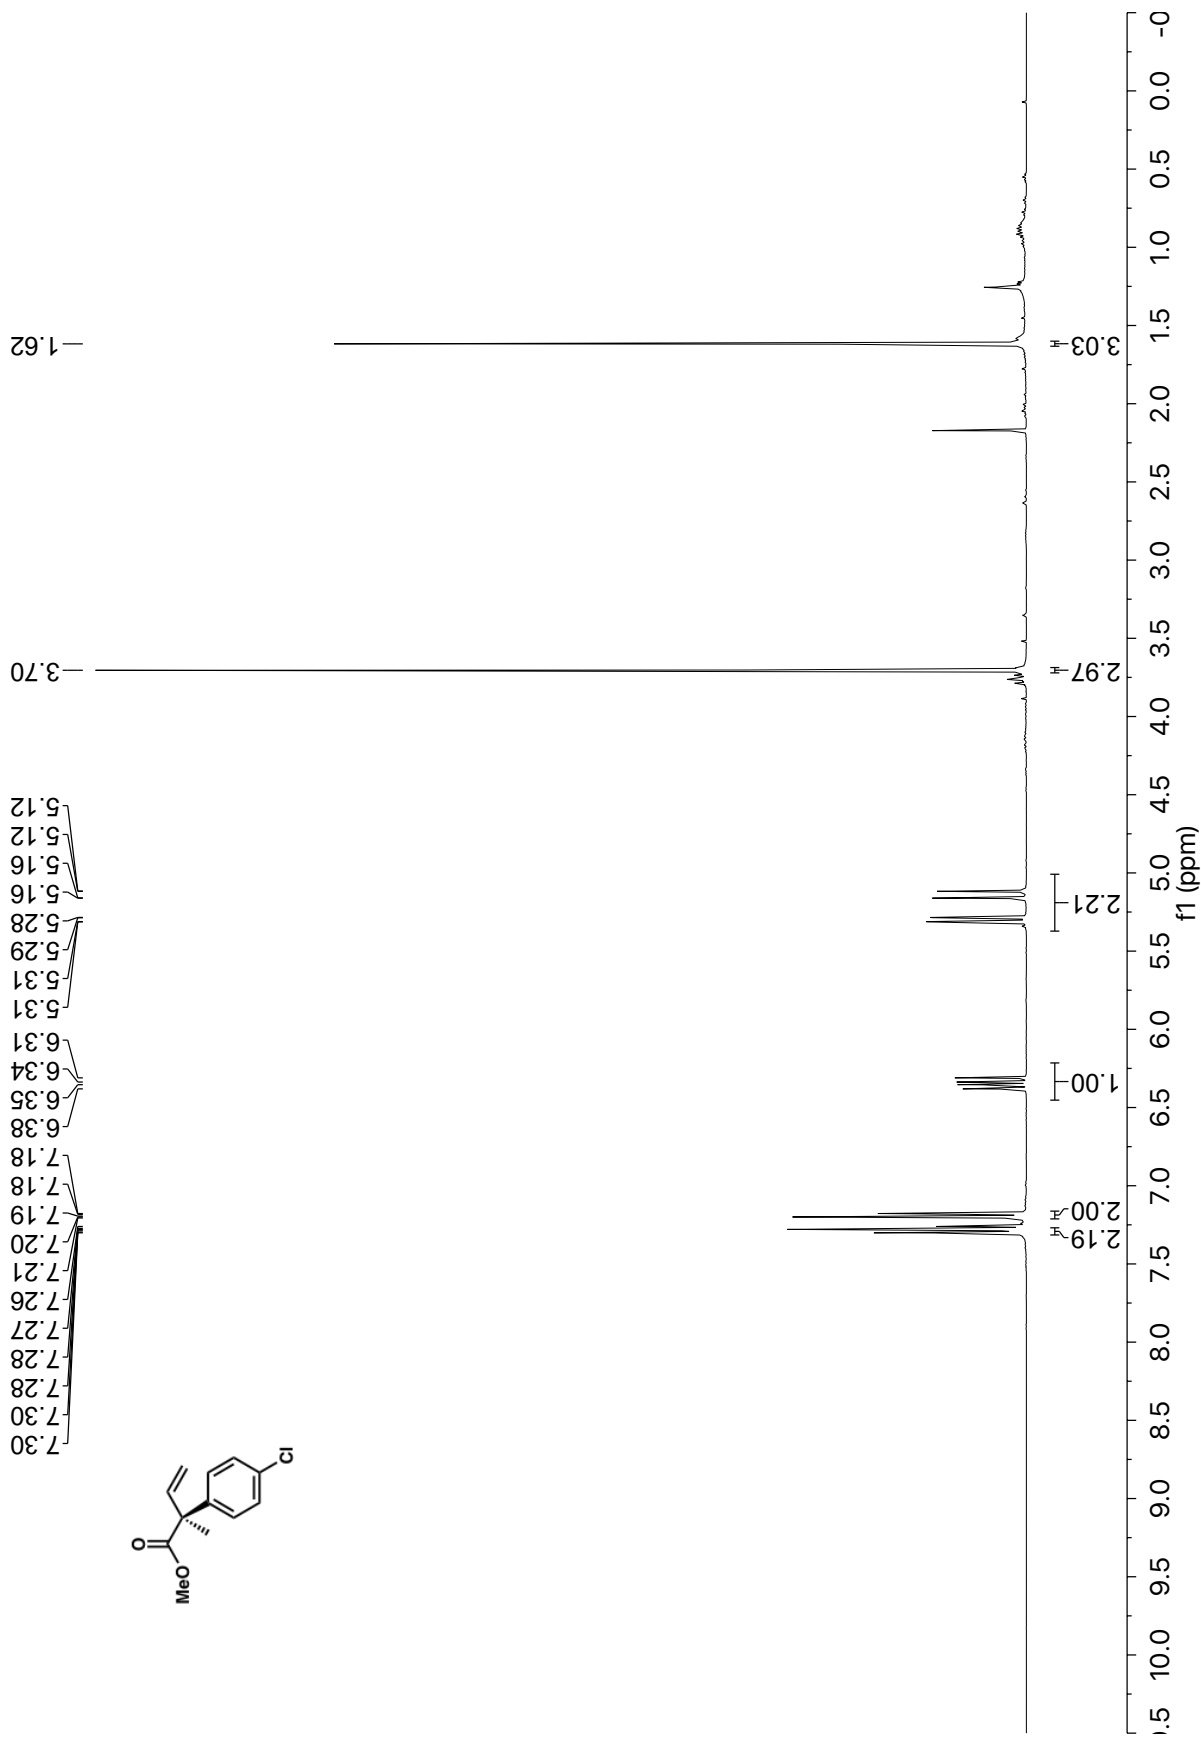

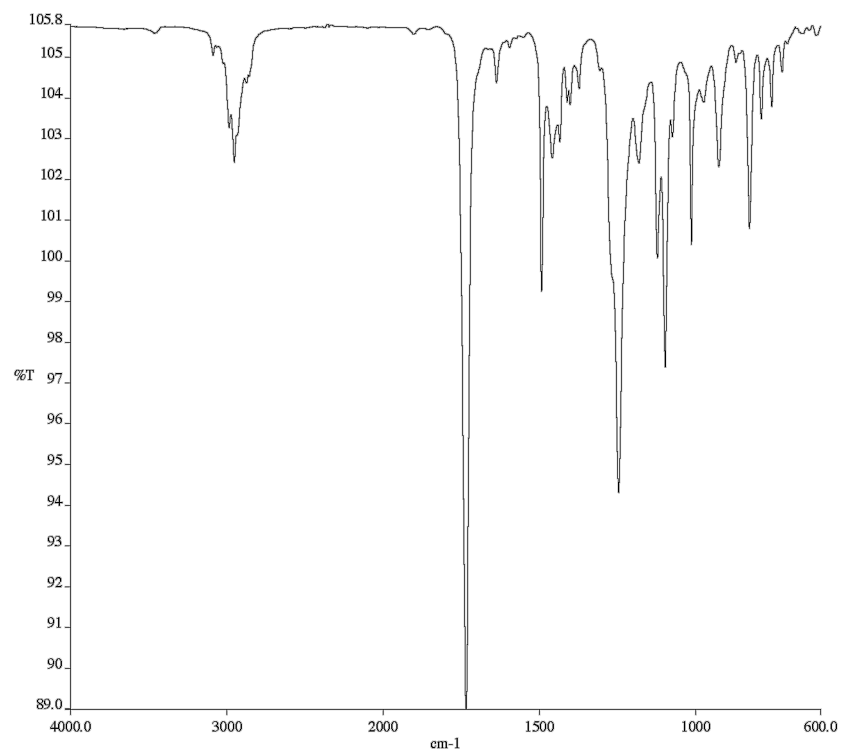

Infrared spectrum (Thin Film, NaCl) of compound **10**.

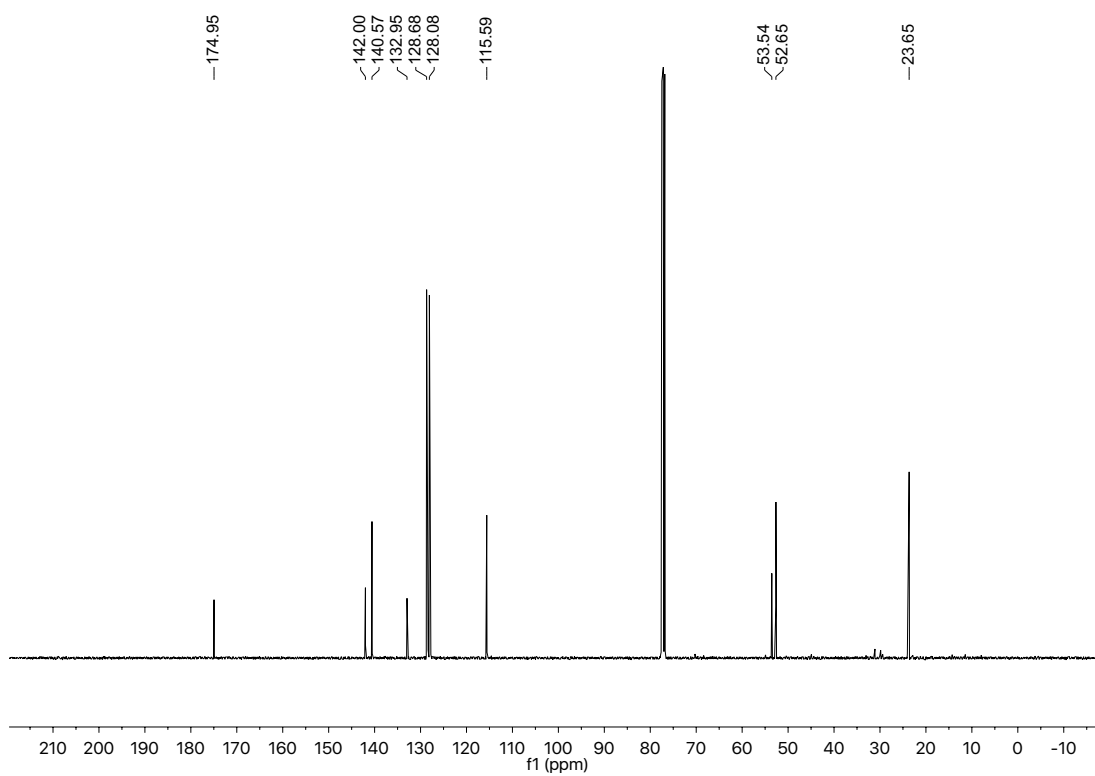

<sup>13</sup>C NMR (101 MHz, CDCl<sub>3</sub>) of compound **10**.

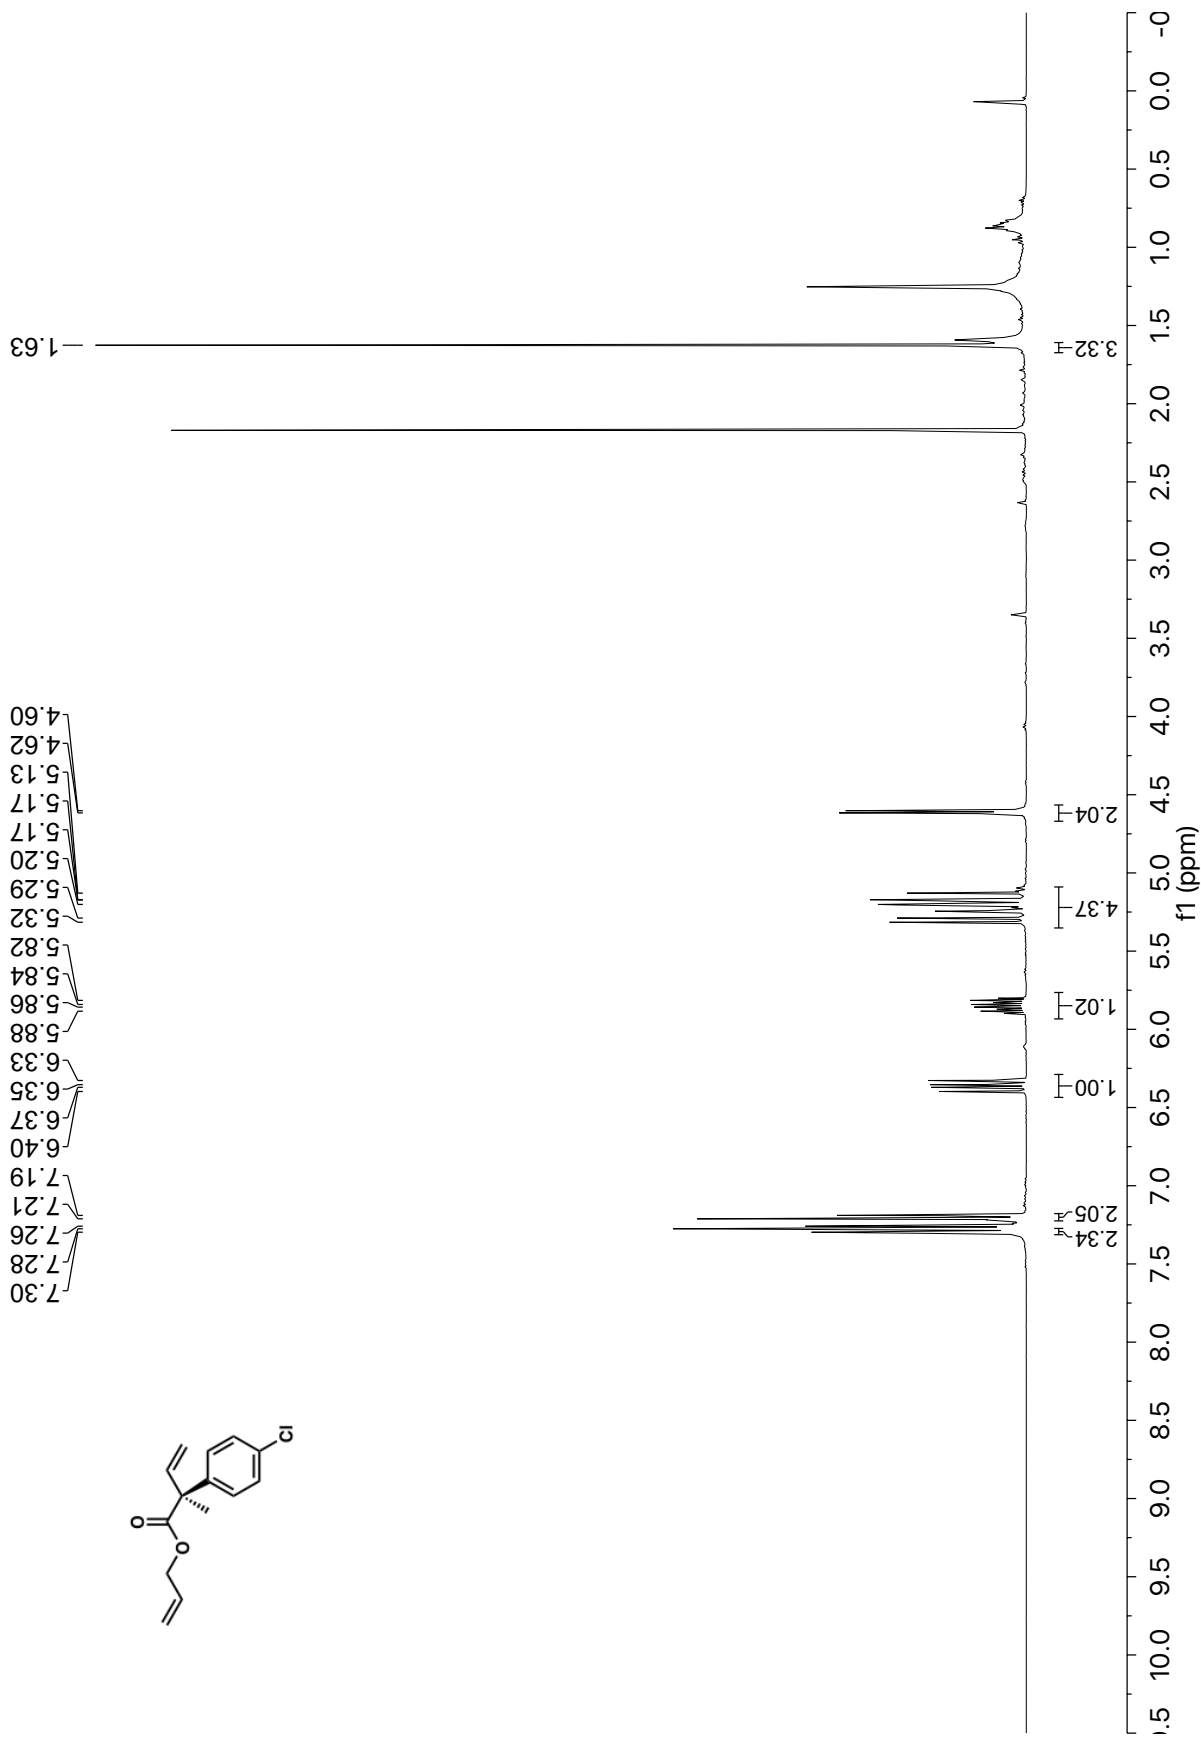

<sup>1</sup>H NMR (400 MHz, CDCl<sub>3</sub>) of compound 11.

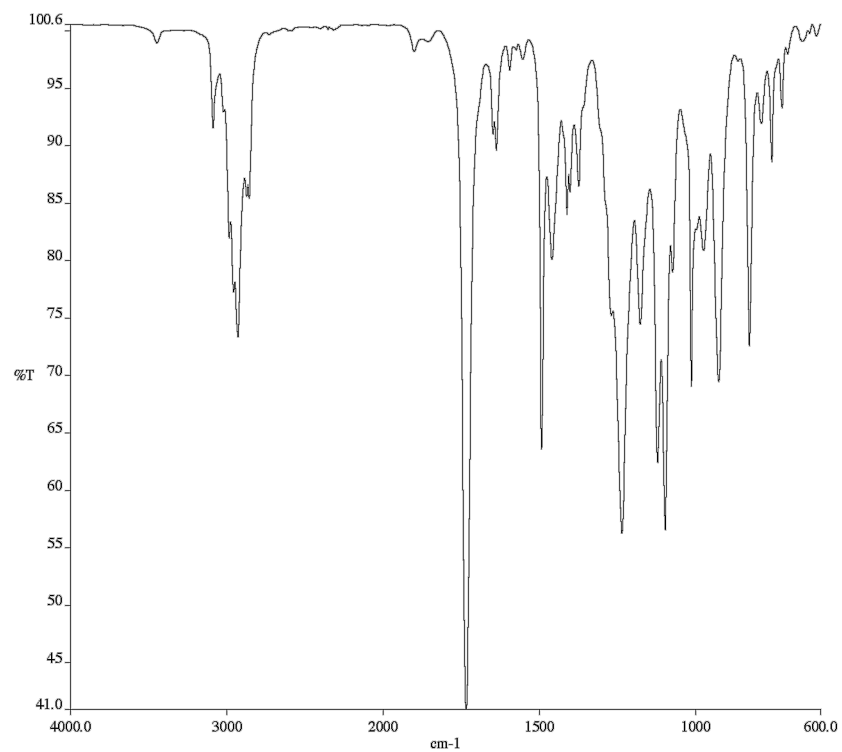

Infrared spectrum (Thin Film, NaCl) of compound **11**.

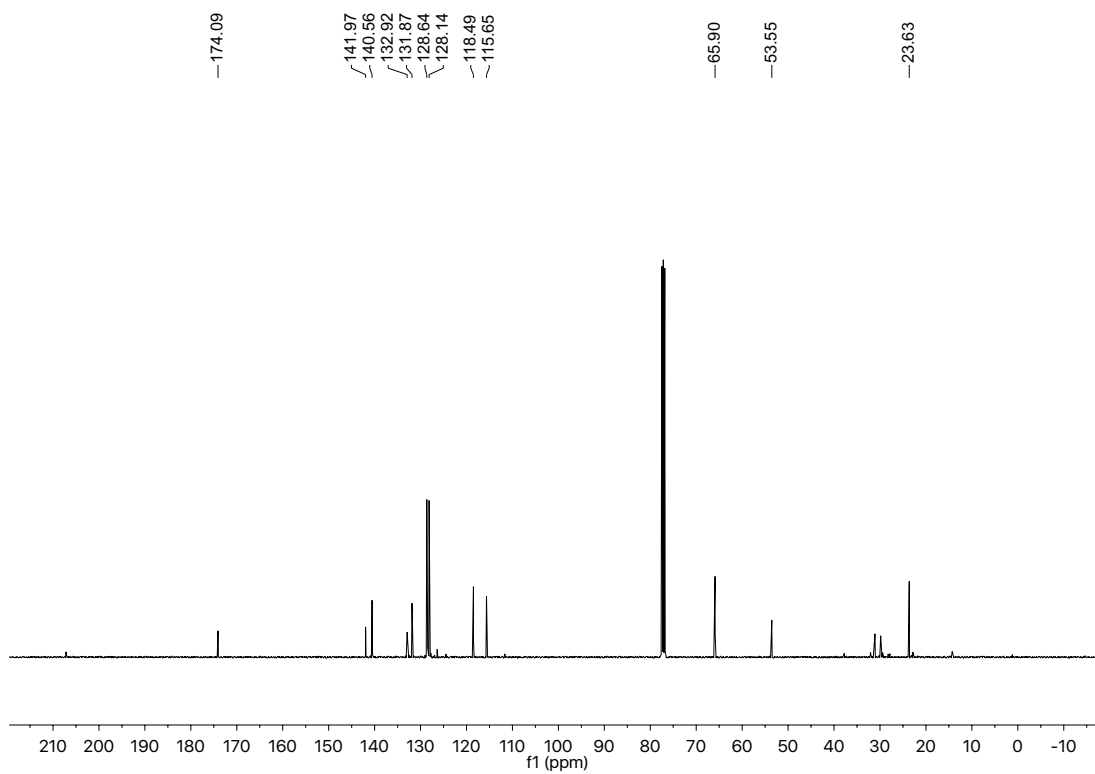

<sup>13</sup>C NMR (101 MHz, CDCl<sub>3</sub>) of compound **11**.



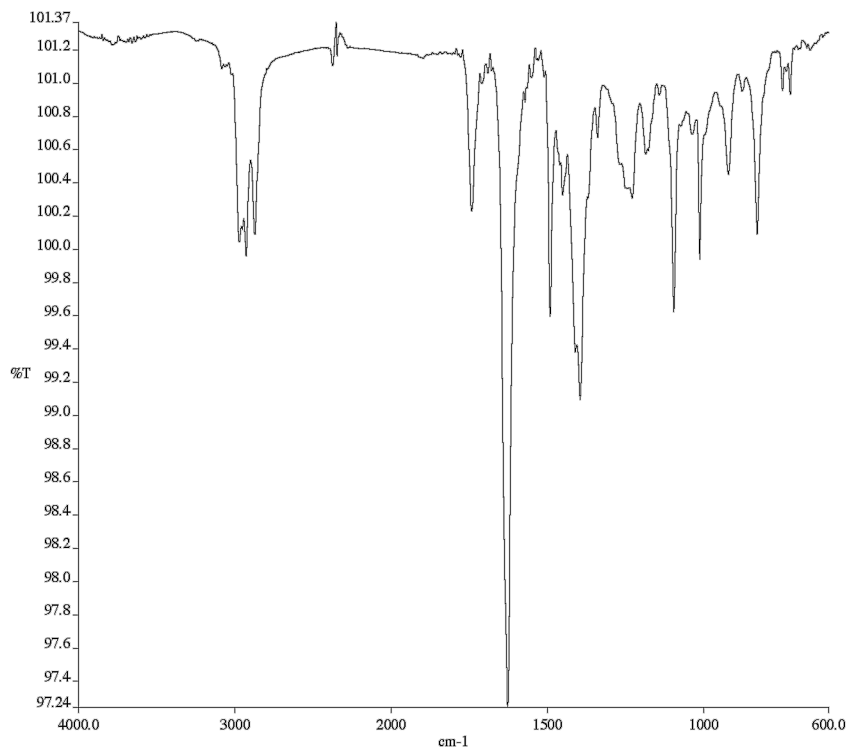

Infrared spectrum (Thin Film, NaCl) of compound **12**.

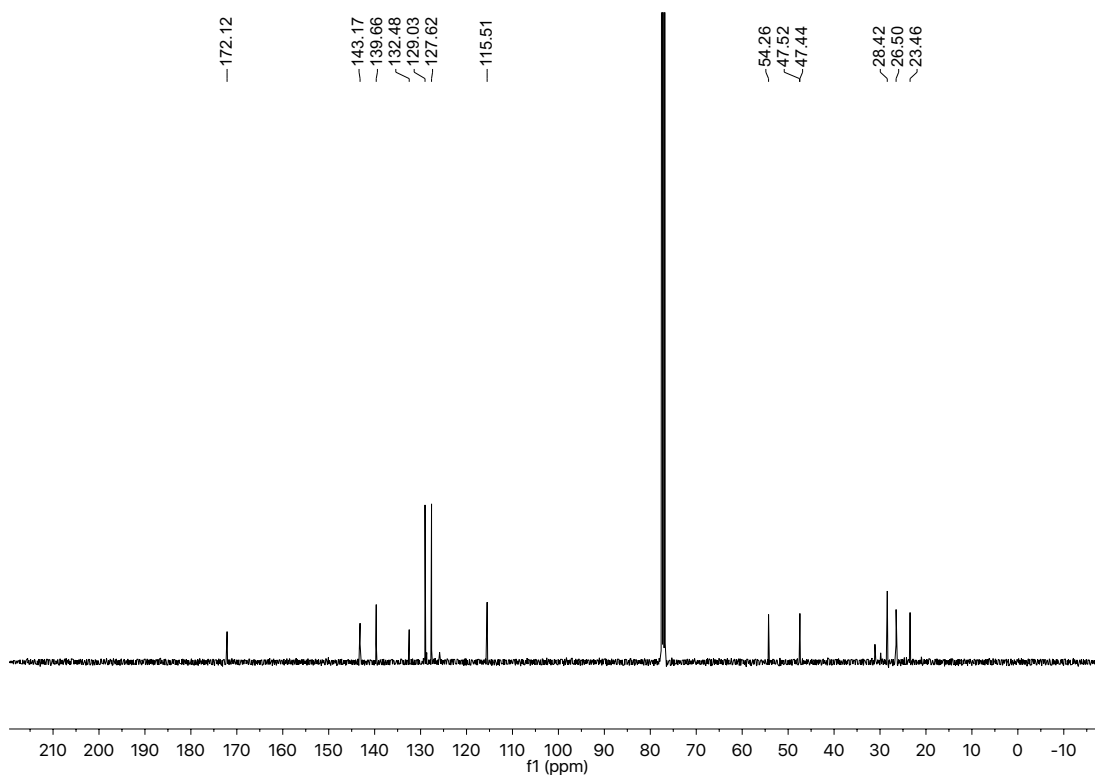

<sup>13</sup>C NMR (101 MHz, CDCl<sub>3</sub>) of compound **12**.



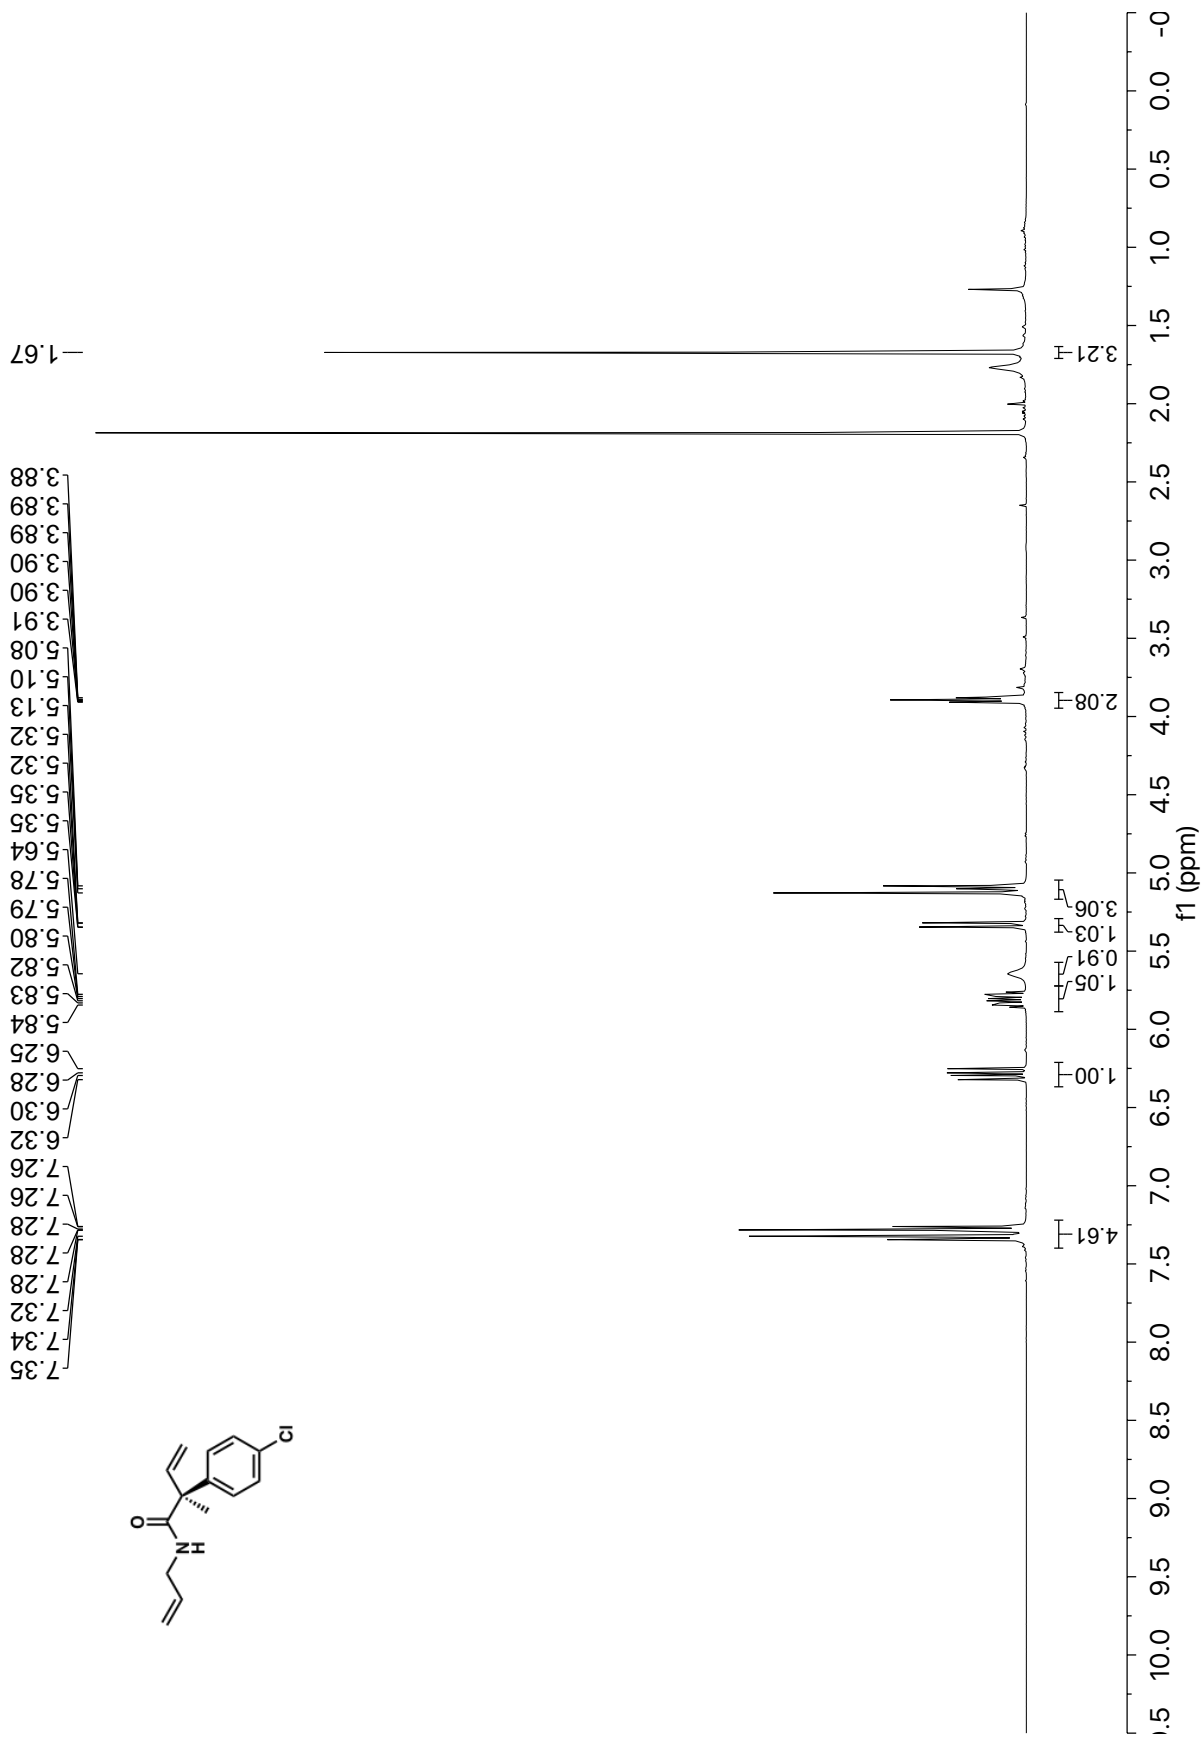

<sup>1</sup>H NMR (400 MHz, CDCl<sub>3</sub>) of compound **13**.

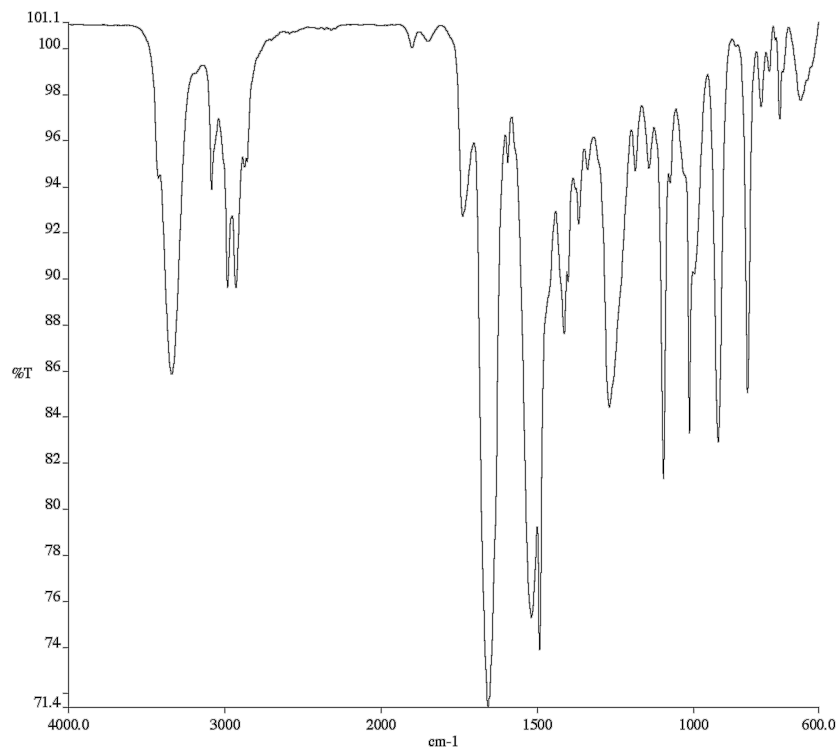

Infrared spectrum (Thin Film, NaCl) of compound **13**.

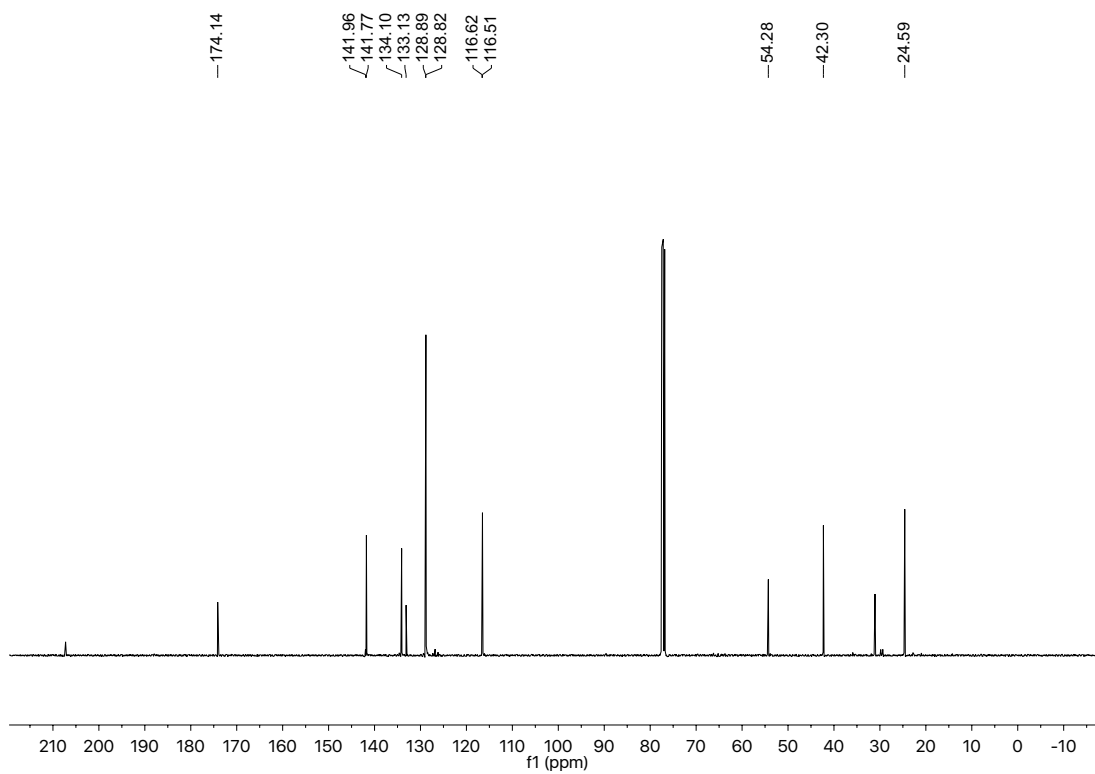

<sup>13</sup>C NMR (101 MHz, CDCl<sub>3</sub>) of compound **13**.

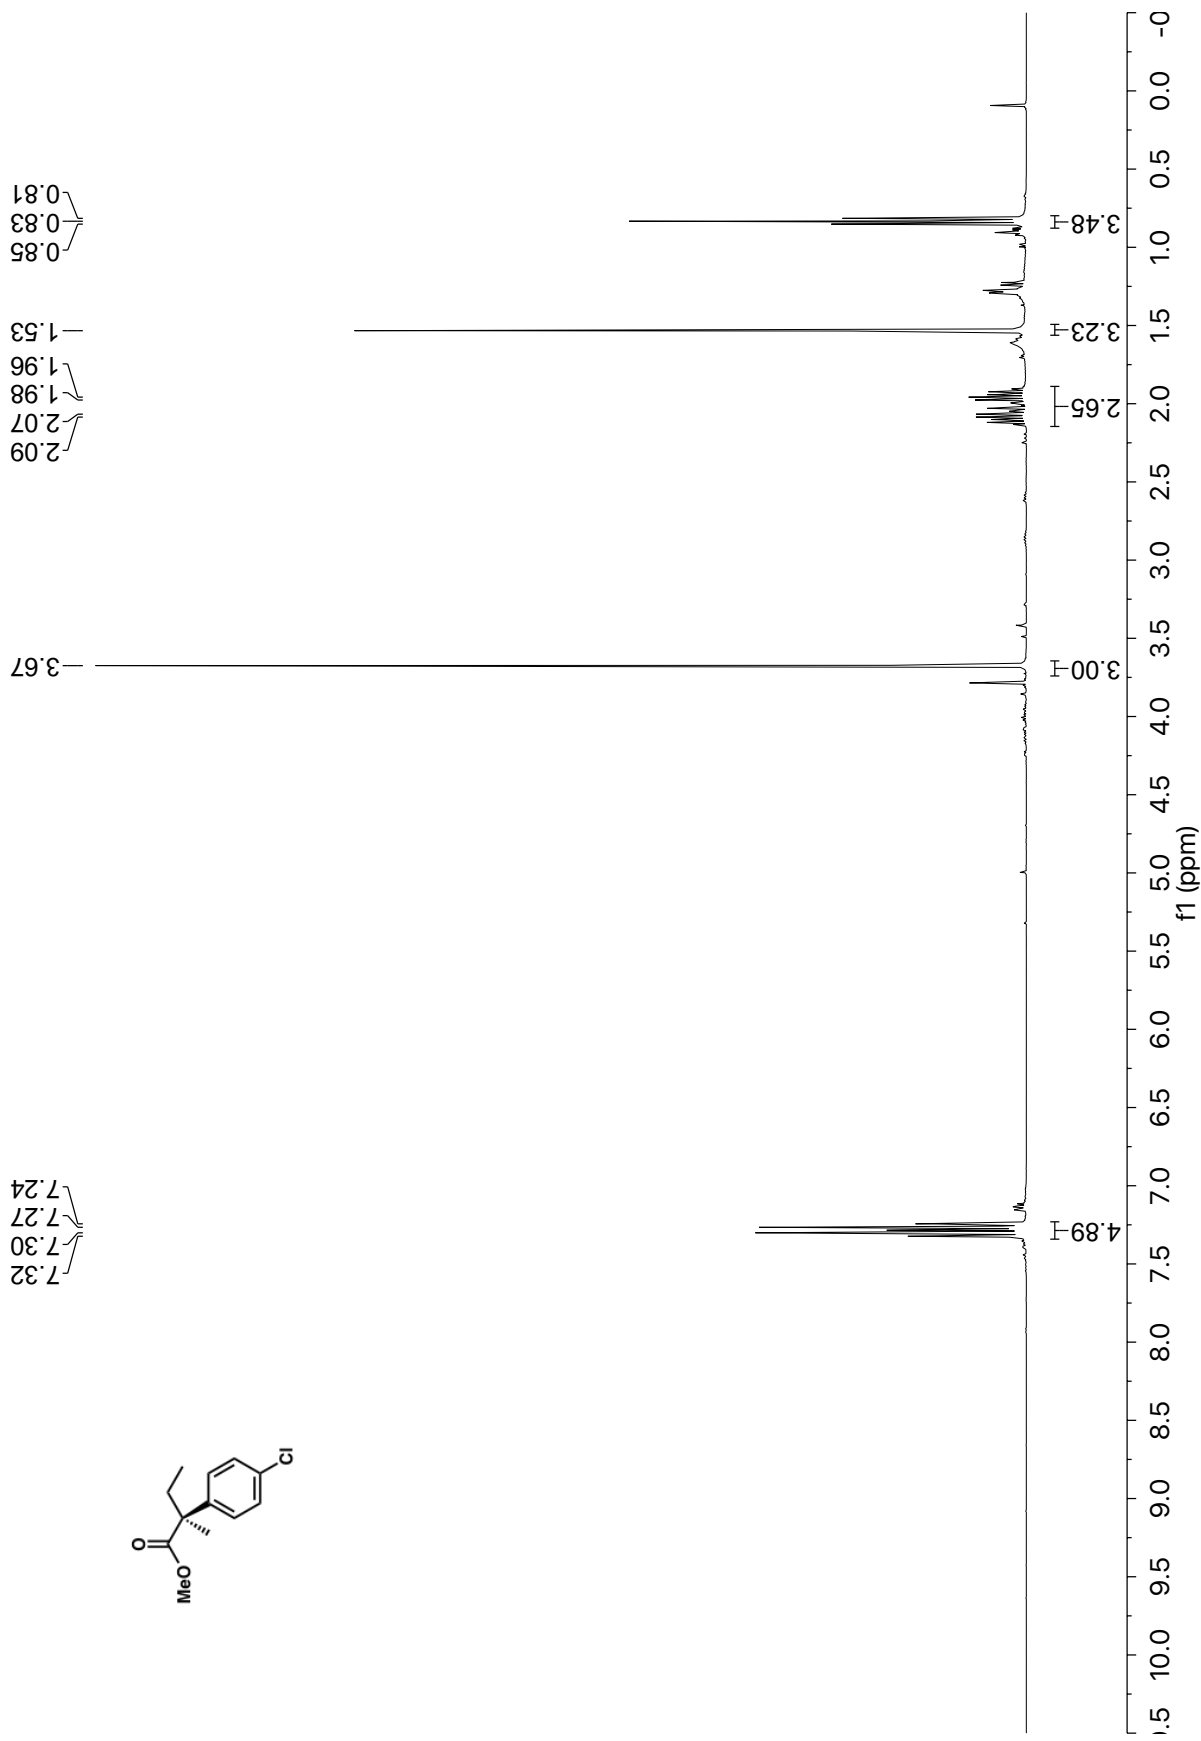

<sup>1</sup>H NMR (400 MHz, CDCl<sub>3</sub>) of compound 14.

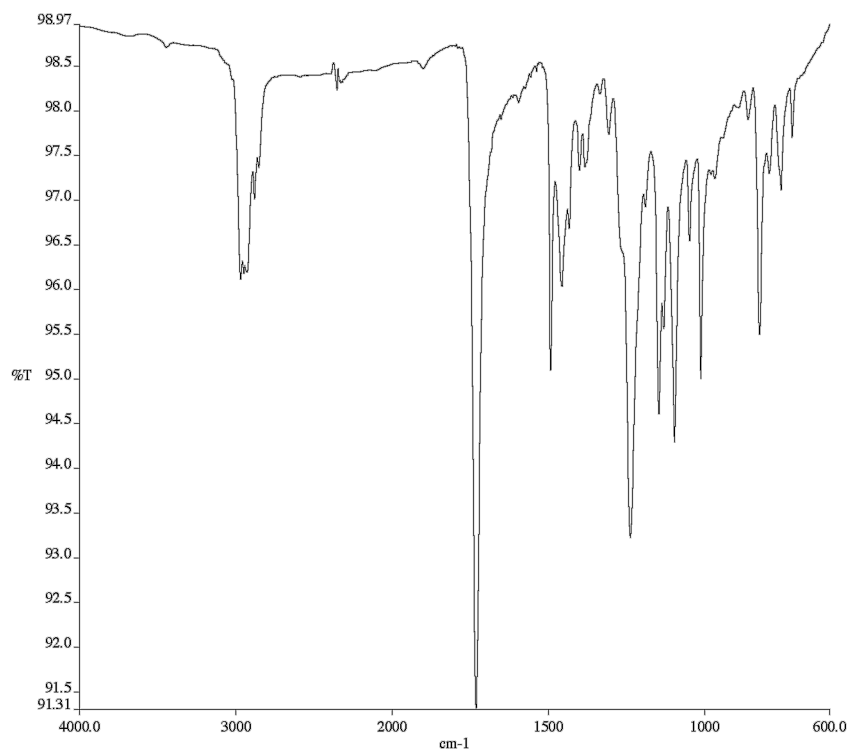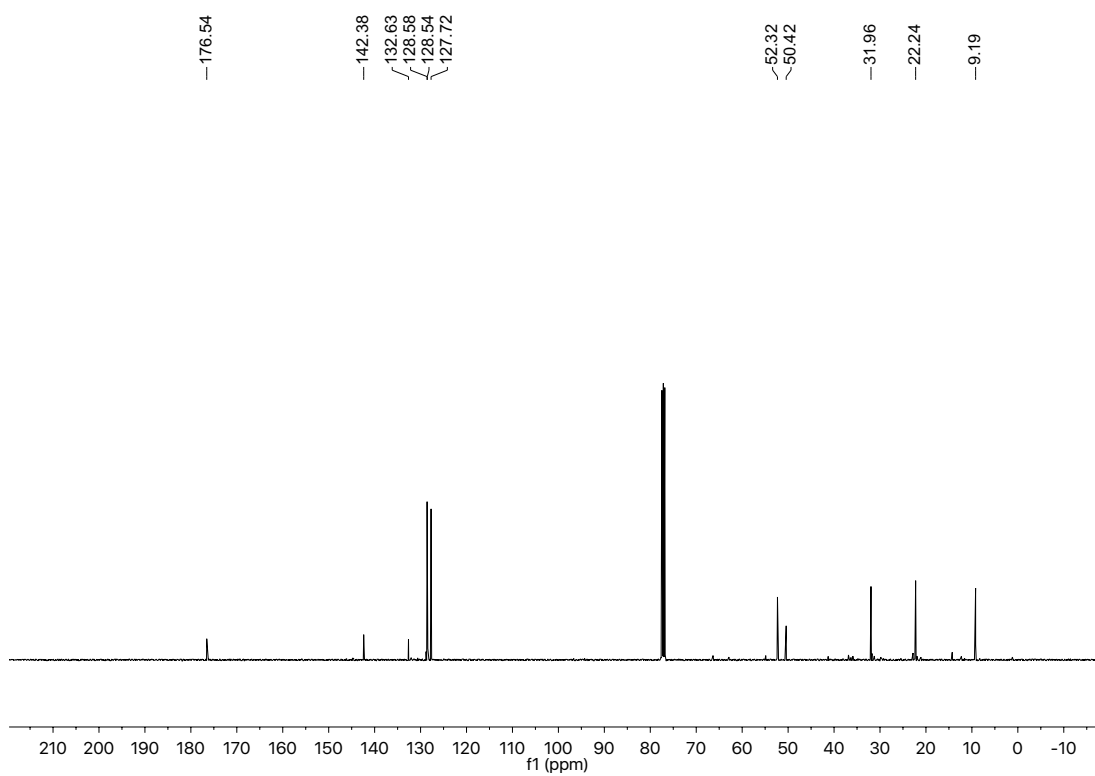

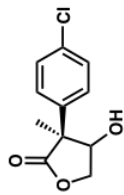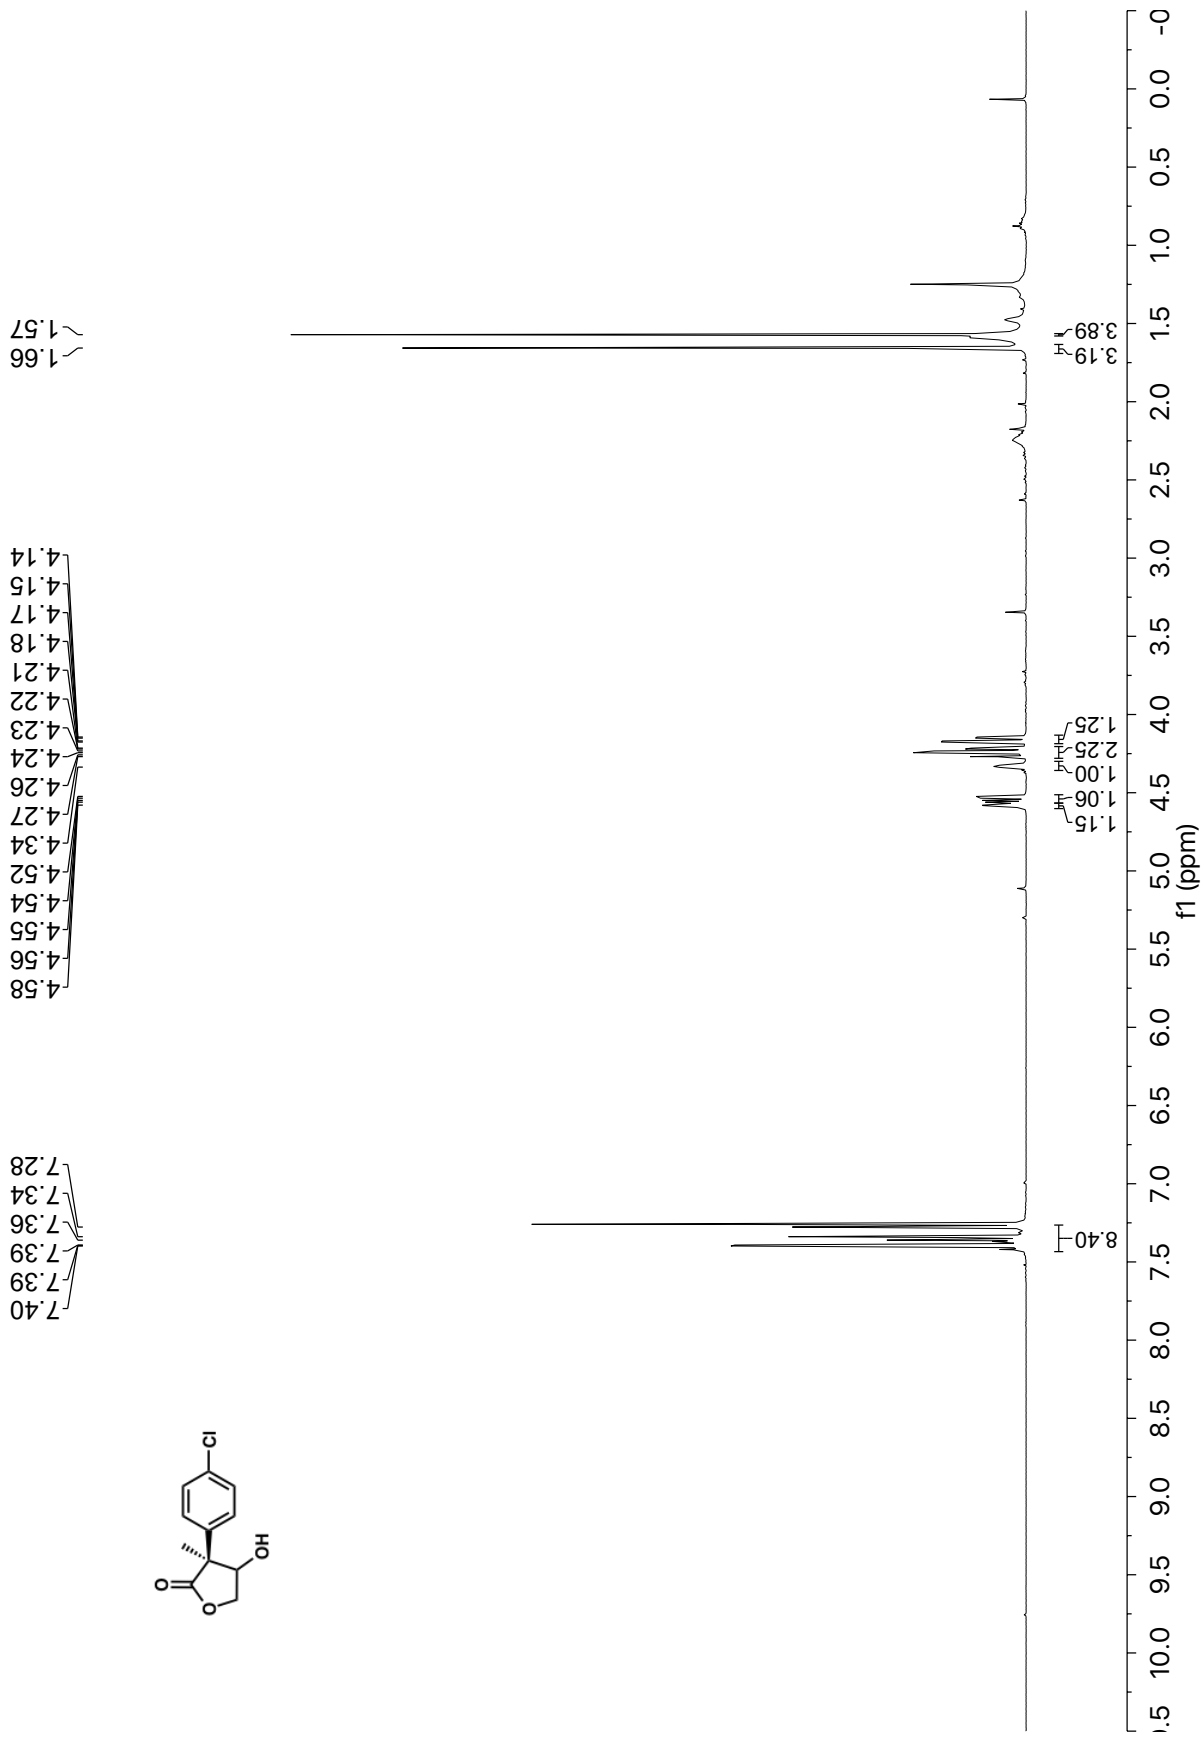

<sup>1</sup>H NMR (400 MHz, CDCl<sub>3</sub>) of compound **16**.

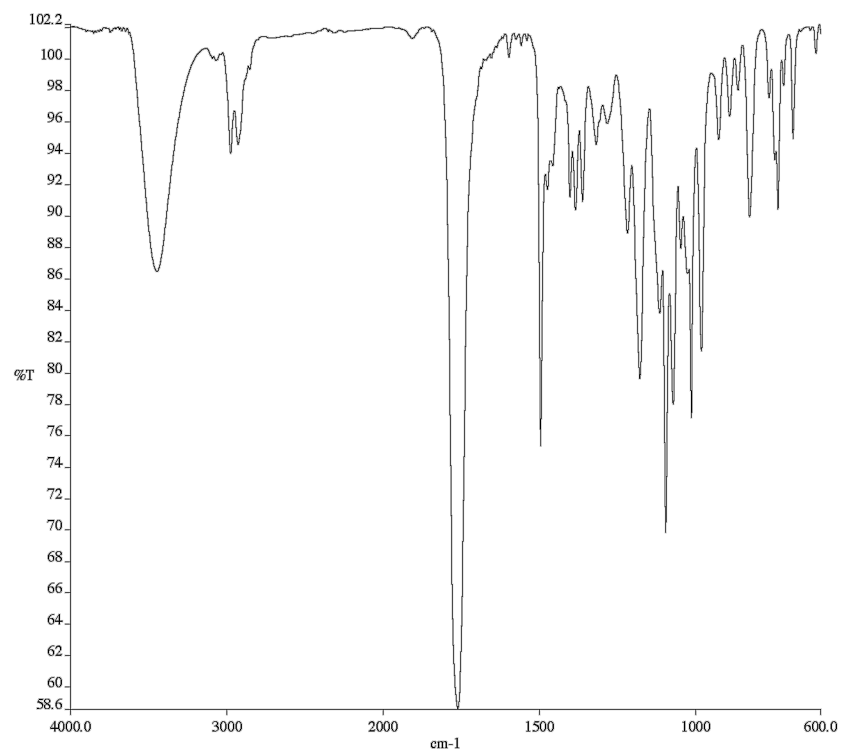

Infrared spectrum (Thin Film, NaCl) of compound **16**.

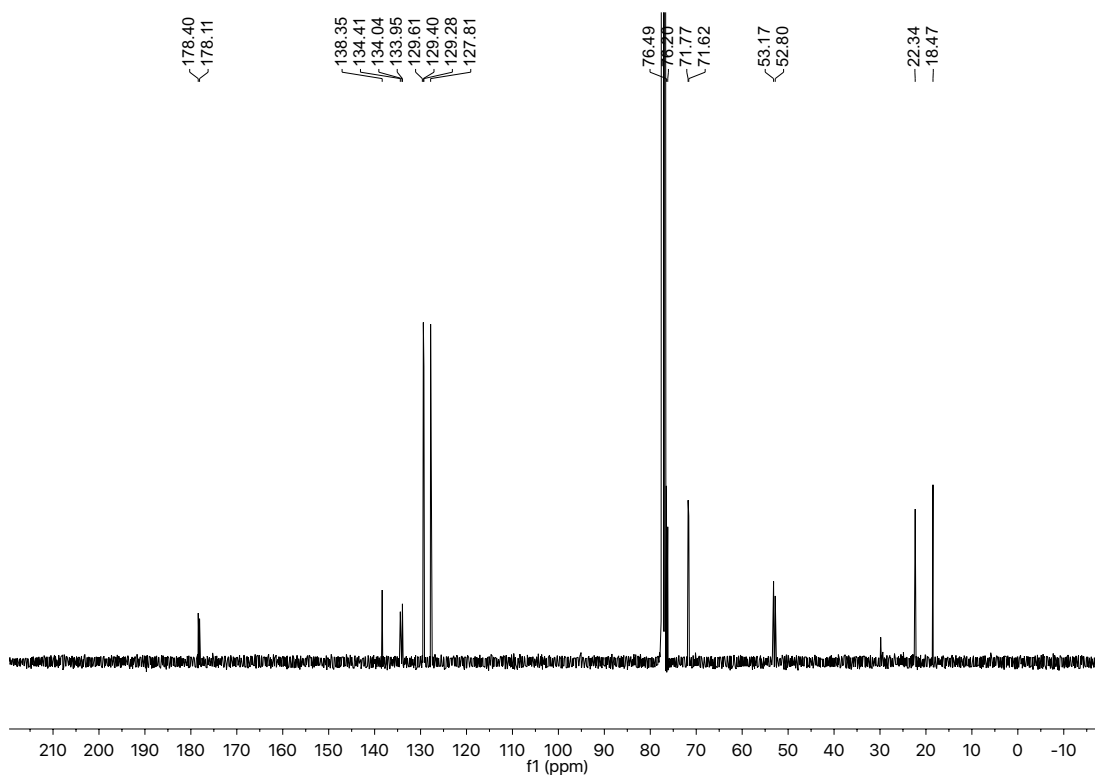

$^{13}\text{C}$  NMR (101 MHz,  $\text{CDCl}_3$ ) of compound **16**.

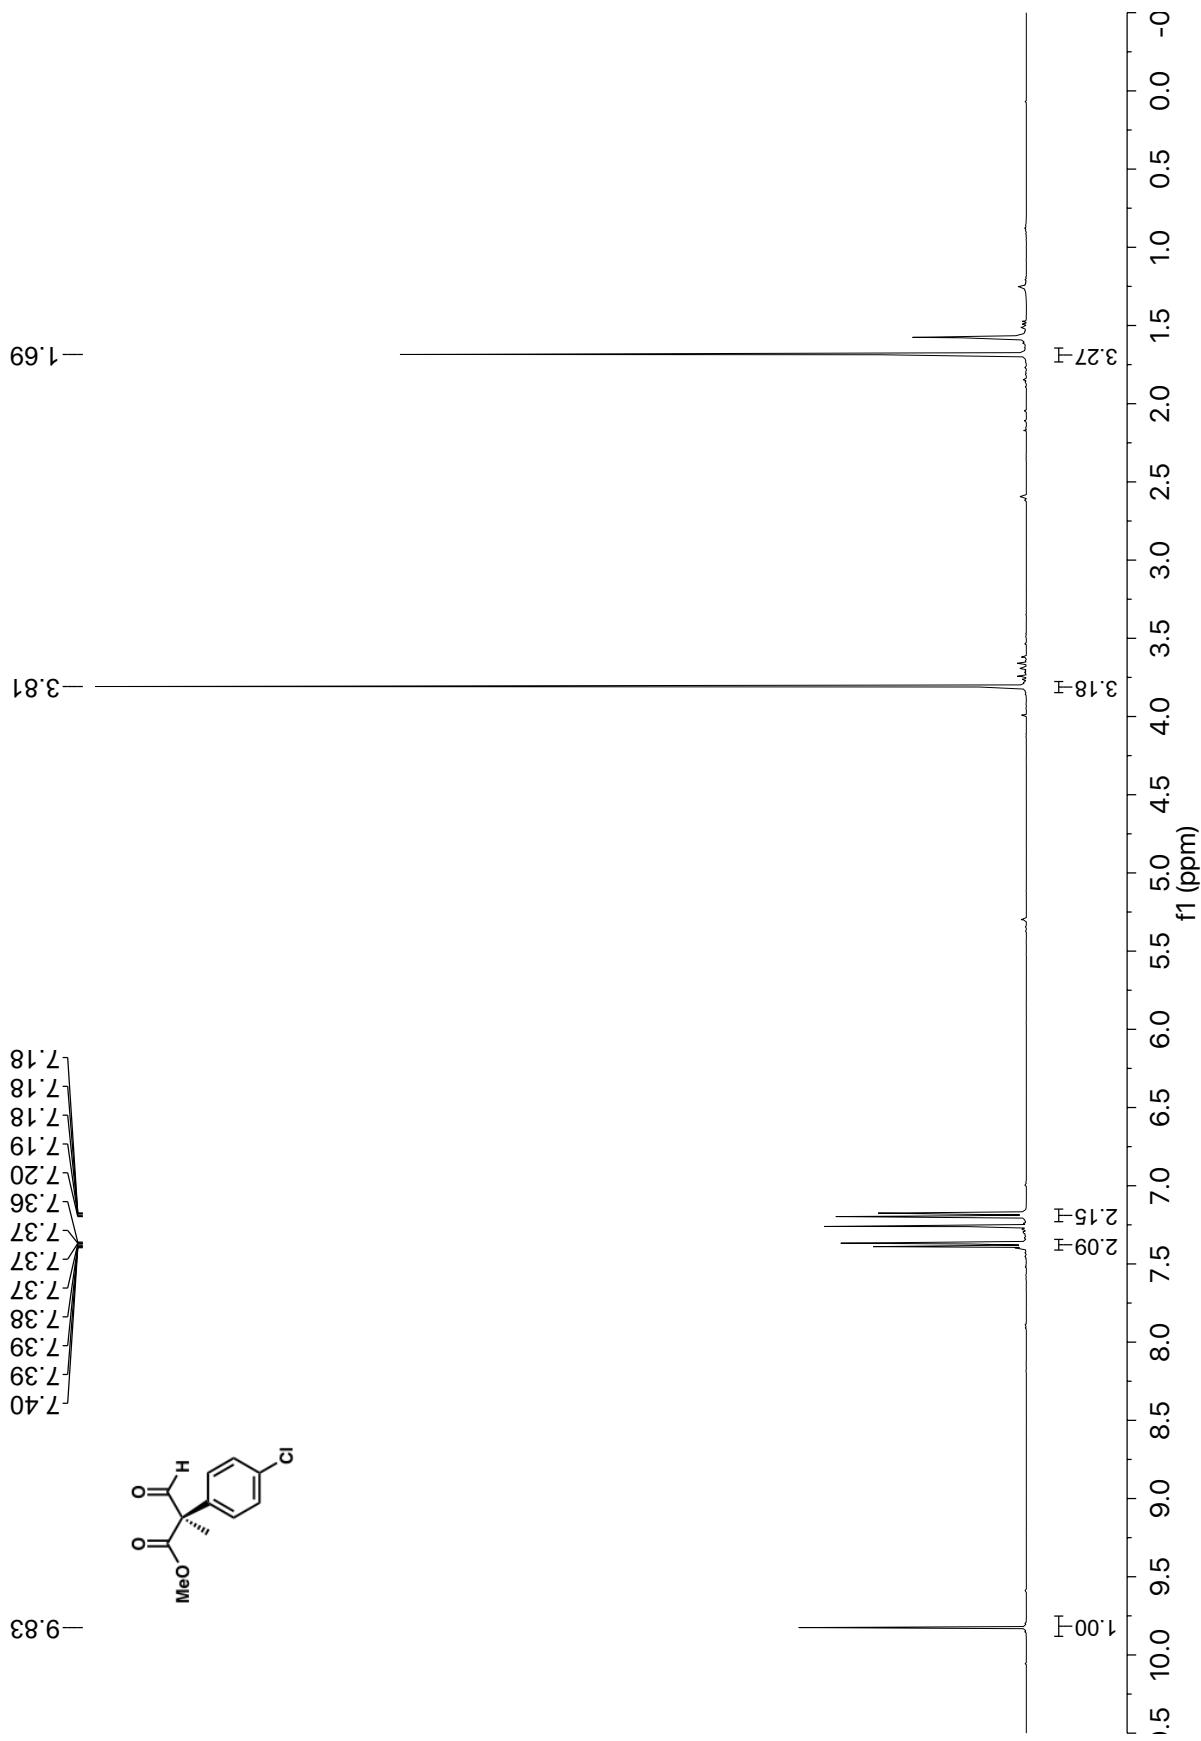

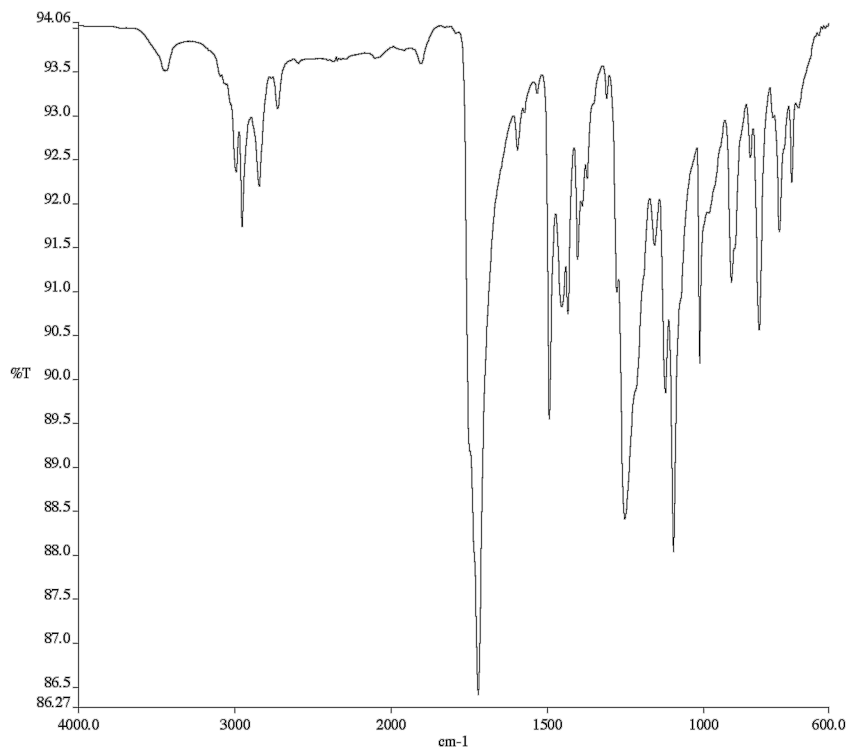

Infrared spectrum (Thin Film, NaCl) of compound 17.

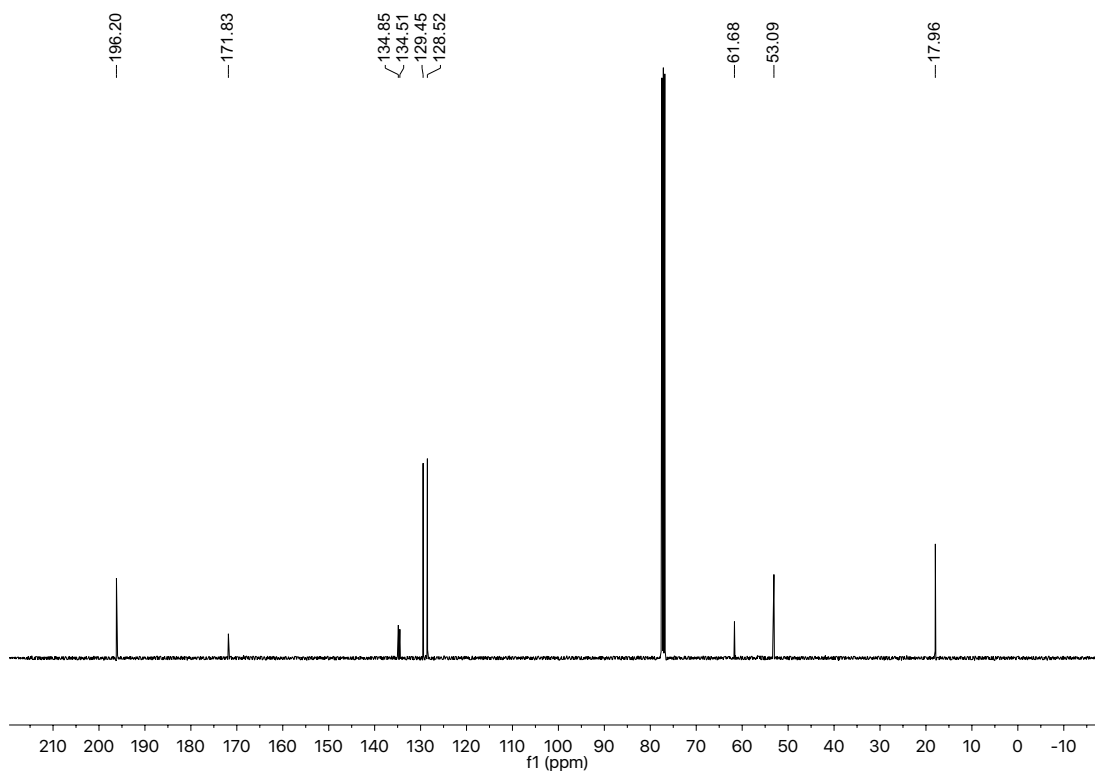

<sup>13</sup>C NMR (101 MHz, CDCl<sub>3</sub>) of compound 17.
